# Supplementary material for: Magnetically recoverable nickel-palladium alloy nanocatalysts for direct C–H arylation reactions
Source: Royal Society of Chemistry journal article supplement (doi:10.1039/d1dt02985a), 2021-01-01

## SUPPORTING INFORMATION

### **Magnetically Recoverable Nickel-Palladium Alloy Nanocatalysts for the C-H Arylation Reactions**

Yunus Zozik,<sup>a,b</sup> Melike Sevim,<sup>a,c</sup> Ferruh Lafzi,<sup>a</sup> Haydar Kilic,<sup>a,b,\*</sup> Önder Metin,<sup>d,\*</sup>

<sup>a</sup>*Department of Chemistry, Faculty of Science, Atatürk University, 25240, Erzurum, TURKEY*

<sup>b</sup>*Oltu Vocational Training School, 25400, Oltu, Erzurum, TURKEY*

<sup>c</sup>*Department of Nanoscience and Nanoengineering, Atatürk University, 25240, Erzurum,  
TURKEY*

<sup>d</sup>*Department of Chemistry, College of Sciences, Koç University, 34450, Sarıyer, İstanbul,  
TURKEY*

## Table of Contents

|                                                                                |         |
|--------------------------------------------------------------------------------|---------|
| 1. Materials and Instrumentation.....                                          | S3      |
| 2. Compound Characterization.....                                              | S3-S9   |
| 3. Reference.....                                                              | S9      |
| 4. Copies of $^1\text{H}$ and $^{13}\text{C}$ NMR Spectra of All Products..... | S10-S44 |

## Experimental details

### Materials

Oleylamine (OAm) (>70%), 1-octadecene (ODE, 90%), palladium (II) acetylacetonate ( $\text{Pd}(\text{acac})_2$ , 99%), nickel(II) acetylacetonate ( $\text{Ni}(\text{acac})_2$ , 97%), Cobalt(II) acetylacetonate ( $\text{Co}(\text{acac})_2$ , 97%), iron(III) acetylacetonate ( $\text{Fe}(\text{acac})_3$ , 97%), benzyl ether (BE, 99%), 1,2-tetradecanediol (1,2-TDD, 97%), borane-tert-bütylamine (BTB, 97%), hexanes (99%), ethanol (99%), acetone (97%), Phosphorus pentoxide ( $\text{P}_2\text{O}_5$ , 95%), Potassium peroxodisulfate ( $\text{K}_2\text{S}_2\text{O}_8$ , 95%), potassium permanganate ( $\text{KMnO}_4$ ), hydrogen peroxide ( $\text{H}_2\text{O}_2$ , 30%), sodium nitrate ( $\text{NaNO}_3$ , 99%), sulfuric acid ( $\text{H}_2\text{SO}_4$ , 98%), dimethylformamide (DMF, >99%) and were purchased from Sigma-Aldrich<sup>®</sup> used as received. Natural graphite flakes (average particle size: 325 mesh) were purchased from Alfa-Aesar. All organic compounds received from commercially sources. A deionized water was distilled using a Milli-Q water purification system.

### Instrumentation

All low-resolution transmission electron microscope (TEM) images were recorded on a Hitachi HT7700 TEM instrument equipped with the EXALENS HR-TEM lens operated at 120 kV. X-ray diffraction (XRD) patterns were recorded on a Panalytical Empyrean diffractometer with Cu-K $\alpha$  radiation (40 kV, 15 mA, 1.54051 Å) over a 2 $\theta$  range from 10°–90° at room temperature. Elemental analysis measurements were carried out on an Agilent Technologies 7700x inductively coupled plasma-mass spectroscopy (ICP-MS) after each sample was completely dissolved in aqua-regia (HCl/HNO<sub>3</sub>: 3/1 v/v ratio). X-ray photoelectron spectra (XPS) were recorded on Thermo Scientific K-Alpha spectrometer using an Al K $\alpha$  (h $\nu$ : 1486.6 eV) radiation. <sup>1</sup>H NMR and <sup>13</sup>C NMR experiments were performed on either 400 MHz Varian and 400 MHz Bruker Avance II instruments using CDCl<sub>3</sub>, DMSO-*d*<sub>6</sub>, MeOD, Acetone-*d*<sub>6</sub> as the solvent with tetramethylenesilane (TMS) as internal standard at room temperature, and the coupling constants *J* are given in hertz. The multiplicity is designated as s = singlet, d = doublet, t = triplet, q = quartet, dd = doublet of doublets, m = multiplet.

### Compound Characterization

**3-Phenylimidazo[1,2-*a*]pyridine (3a).**<sup>[1]</sup> Light yellow crystal, 94 mg from bromobenzene (97% yield, 30:70 EtOAc/hexane) and 93 mg from iodobenzene (96% yield). <sup>1</sup>H NMR (400 MHz, CDCl<sub>3</sub>):  $\delta$  8.18 (d, *J* = 6.9 Hz, 1H), 7.59 – 7.50 (m, 2H), 7.45 – 7.33 (m, 4H), 7.32 – 7.24 (m, 1H), 7.09 – 6.99 (m, 1H), 6.65 (t, *J* = 6.9 Hz, 1H). <sup>13</sup>C NMR (100 MHz, CDCl<sub>3</sub>):  $\delta$  146.0, 132.3, 129.2, 129.2, 128.2, 128.0, 125.7, 124.3, 123.3, 118.1, 112.6.

**3-(4-Nitrophenyl)imidazo[1,2-*a*]pyridine (3b).**<sup>[1]</sup> Yellow solid, 116 mg from 1-bromo-4-nitrobenzene (97% yield, 30:70 EtOAc/hexane) and 115 mg from 1-iodo-4-nitrobenzene (96% yield). <sup>1</sup>H NMR (400 MHz, CDCl<sub>3</sub>):  $\delta$  8.35 (d, *J* = 7.0 Hz, 1H), 8.33 – 8.26 (m, 2H), 7.79 (s, 1H), 7.73 – 7.64 (m, 3H), 7.28 – 7.20

(m, 1H), 6.87 (t,  $J = 6.8$  Hz, 1H).  $^{13}\text{C}$  NMR (100 MHz,  $\text{CDCl}_3$ ):  $\delta$  147.3, 146.8, 135.9, 134.7, 127.5, 125.5, 124.8, 123.7, 123.2, 118.8, 113.6.

**4-(Imidazo[1,2-*a*]pyridin-3-yl)benzotrile (3c).**<sup>[1]</sup> Light yellow solid, 105 mg from 4-bromobenzotrile (96% yield, 30:70 EtOAc/hexane) and 107 mg from 4-iodobenzotrile (97% yield).  $^1\text{H}$  NMR (400 MHz,  $\text{CDCl}_3$ ):  $\delta$  8.30 (d,  $J = 7.0$  Hz, 1H), 7.74 – 7.68 (m, 3H), 7.66 – 7.58 (m, 3H), 7.24 – 7.15 (m, 1H), 6.83 (t,  $J = 7.4$  Hz, 1H).  $^{13}\text{C}$  NMR (100 MHz,  $\text{CDCl}_3$ ):  $\delta$  147.0, 134.1, 133.9, 133.1, 127.6, 125.3, 124.0, 123.2, 118.6, 118.5, 113.5, 111.2.

**4-(Imidazo[1,2-*a*]pyridin-3-yl)benzaldehyde (3d).**<sup>[1]</sup> Light yellow solid, 106 mg from 4-bromobenzaldehyde (95% yield, 30:70 EtOAc/hexane) and 108 mg from 4-iodobenzaldehyde (97% yield).  $^1\text{H}$  NMR (400 MHz,  $\text{CDCl}_3$ ):  $\delta$  9.92 (s, 1H), 8.31 (d,  $J = 6.8$  Hz, 1H), 7.88 (d,  $J = 8.1$  Hz, 2H), 7.70 (s, 1H), 7.63 – 7.57 (m, 3H), 7.19 – 7.08 (m, 1H), 6.78 (t,  $J = 6.8$  Hz, 1H).  $^{13}\text{C}$  NMR (100 MHz,  $\text{CDCl}_3$ ):  $\delta$  191.3, 146.9, 135.3, 135.2, 134.0, 130.6, 127.4, 125.1, 124.5, 123.4, 118.4, 113.3.

**1-(4-(Imidazo[1,2-*a*]pyridin-3-yl)phenyl)ethan-1-one (3e).**<sup>[1]</sup> Light yellow solid, 115 mg from 1-(4-bromophenyl)ethan-1-one (97% yield, 30:70 EtOAc/hexane) and 114 mg from 1-(4-iodophenyl)ethan-1-one (96% yield).  $^1\text{H}$  NMR (400 MHz,  $\text{CDCl}_3$ ):  $\delta$  8.32 (d,  $J = 7.1$  Hz, 1H), 8.01 (d,  $J = 8.4$  Hz, 2H), 7.71 (s, 1H), 7.65 – 7.55 (m, 3H), 7.23 – 7.11 (m, 1H), 6.79 (t,  $J = 7.1$  Hz, 1H), 2.57 (s, 3H).  $^{13}\text{C}$  NMR (100 MHz,  $\text{CDCl}_3$ ):  $\delta$  197.2, 146.8, 136.2, 134.0, 133.8, 129.3, 127.3, 124.9, 124.7, 123.4, 118.5, 113.1, 26.6.

**Methyl 4-(imidazo[1,2-*a*]pyridin-3-yl)benzoate (3f).**<sup>[2]</sup> White solid, 106 mg from methyl 4-bromobenzoate (84% yield, 30:70 EtOAc/hexane) and 109 mg from methyl 4-iodobenzoate (86% yield).  $^1\text{H}$  NMR (400 MHz,  $\text{CDCl}_3$ ):  $\delta$  8.33 (d,  $J = 6.9$  Hz, 1H), 8.11 (d,  $J = 8.3$  Hz, 2H), 7.72 (s, 1H), 7.65 – 7.58 (m, 3H), 7.22 – 7.10 (m, 1H), 6.81 (t,  $J = 6.9$  Hz, 1H), 3.89 (s, 3H).  $^{13}\text{C}$  NMR (100 MHz,  $\text{CDCl}_3$ ):  $\delta$  166.6, 146.8, 133.9, 133.6, 130.6, 129.4, 127.2, 124.8, 123.4, 118.5, 115.6, 113.1, 52.3.

**3-(4-(Trifluoromethyl)phenyl)imidazo[1,2-*a*]pyridine (3g).**<sup>[1]</sup> Light yellow solid, 121 mg from 1-iodo-4-(trifluoromethyl)benzene (92% yield, 30:70 EtOAc/hexane).  $^1\text{H}$  NMR (400 MHz,  $\text{CDCl}_3$ ):  $\delta$  8.27 (d,  $J = 7.0$  Hz, 1H), 7.69 (t,  $J = 4.1$  Hz, 3H), 7.62 (t,  $J = 7.4$  Hz, 3H), 7.23 – 7.10 (m, 1H), 6.79 (t,  $J = 7.4$  Hz, 1H).  $^{13}\text{C}$  NMR (100 MHz,  $\text{CDCl}_3$ ):  $\delta$  146.7, 133.4, 133.0, 130.1, 129.8, 127.8, 126.4-126.2 (m, 1C), 124.9, 124.3, 123.2, 118.5, 113.1.

**3-(3-Nitrophenyl)imidazo[1,2-*a*]pyridine (3h).**<sup>[3]</sup> Brownish solid, 113 mg from 1-bromo-3-nitrobenzene (94% yield, 30:70 EtOAc/hexane) and 111 mg from 1-iodo-3-nitrobenzene (93% yield).  $^1\text{H}$  NMR (400 MHz,  $\text{CDCl}_3$ ):  $\delta$  8.37 (m, 1H), 8.30 – 8.25 (m, 1H), 8.19 – 8.17 (m, 1H), 7.87 – 7.80 (m, 1H), 7.74 (m, 1H), 7.66 – 7.62 (m, 2H), 7.25 – 7.17 (m, 1H), 6.84 (t,  $J = 6.8$  Hz, 1H).  $^{13}\text{C}$  NMR (100 MHz,  $\text{CDCl}_3$ ):  $\delta$  148.9, 146.8, 133.9, 133.5, 131.2, 130.4, 125.1, 123.3, 122.9, 122.7, 122.1, 118.7, 113.4.

**3-(Imidazo[1,2-*a*]pyridin-3-yl)benzotrile (3i).**<sup>[2]</sup> Light brownish solid, 108 mg from 3-bromobenzotrile (98% yield, 30:70 EtOAc/hexane) and 106 mg from 3-iodobenzotrile (97% yield). <sup>1</sup>H NMR (400 MHz, CDCl<sub>3</sub>): δ 8.22 (d, *J* = 7.0 Hz, 1H), 7.76 (s, 1H), 7.73 – 7.70 (m, 1H), 7.65 (s, 1H), 7.62 – 7.52 (m, 3H), 7.19 – 7.12 (m, 1H), 6.80 (t, *J* = 7.3 Hz, 1H). <sup>13</sup>C NMR (100 MHz, CDCl<sub>3</sub>): δ 146.7, 133.6, 131.9, 131.3, 130.9, 130.8, 130.3, 125.0, 123.4, 122.9, 118.5, 118.3, 113.6, 113.3.

**3-(Imidazo[1,2-*a*]pyridin-3-yl)benzaldehyde (3j).**<sup>[2]</sup> Light yellow solid, 106 mg from 3-bromobenzaldehyde (95% yield, 30:70 EtOAc/hexane) and 102 mg from 3-iodobenzaldehyde (92% yield). <sup>1</sup>H NMR (400 MHz, CDCl<sub>3</sub>): δ 10.07 (s, 1H), 8.33 (d, *J* = 7.0 Hz, 1H), 8.06 (s, 1H), 7.93 – 7.86 (m, 1H), 7.84 – 7.78 (m, 1H), 7.75 (s, 1H), 7.72 – 7.63 (m, 2H), 7.27 – 7.17 (m, 1H), 6.85 (t, *J* = 7.3 Hz, 1H); <sup>13</sup>C NMR (100 MHz, CDCl<sub>3</sub>): δ 191.8, 146.5, 137.2, 133.6, 133.2, 130.4, 130.1, 129.5, 128.2, 124.8, 124.3, 123.1, 118.4, 113.1.

**2-(Imidazo[1,2-*a*]pyridin-3-yl)benzaldehyde (3k).**<sup>[2]</sup> Brownish oil, 102 mg from 2-bromobenzaldehyde (92% yield, 30:70 EtOAc/hexane) and 105 mg from 2-iodobenzaldehyde (94% yield). <sup>1</sup>H NMR (400 MHz, CDCl<sub>3</sub>): δ 9.80 (s, 1H), 8.02 (d, *J* = 7.8 Hz, 1H), 7.87 (d, *J* = 6.9 Hz, 1H), 7.71 – 7.62 (m, 2H), 7.62 (s, 1H), 7.58 – 7.44 (m, 2H), 7.25 – 7.13 (m, 1H), 6.77 (t, *J* = 6.9 Hz, 1H). <sup>13</sup>C NMR (100 MHz, CDCl<sub>3</sub>): δ 191.1, 146.2, 134.8, 134.7, 134.5, 131.3, 131.1, 129.5, 129.4, 125.5, 123.4, 120.9, 118.1, 113.4.

**3-(*p*-Tolyl)imidazo[1,2-*a*]pyridine (3l).**<sup>[1]</sup> Brownish solid, 76 mg from 1-bromo-4-methylbenzene (73% yield, 30:70 EtOAc/hexane) and 78 mg from 1-iodo-4-methylbenzene (75% yield). <sup>1</sup>H NMR (400 MHz, CDCl<sub>3</sub>): δ 8.16 (d, *J* = 6.9 Hz, 1H), 7.54 (d, *J* = 7.9 Hz, 2H), 7.30 (d, *J* = 8.0 Hz, 2H), 7.18 (d, *J* = 8.0 Hz, 2H), 7.06 – 7.00 (m, 1H), 6.64 (t, *J* = 6.9 Hz, 1H), 2.30 (s, 3H). <sup>13</sup>C NMR (100 MHz, CDCl<sub>3</sub>): δ 145.9, 138.1, 132.2, 129.9, 128.0, 126.3, 125.7, 124.0, 123.4, 118.1, 112.4, 21.3.

**3-(4-Methoxyphenyl)imidazo[1,2-*a*]pyridine (3m).**<sup>[1]</sup> Light yellow solid, 89 mg from 1-bromo-4-methoxybenzene (79% yield, 30:70 EtOAc/hexane) and 90 mg from 1-iodo-4-methoxybenzene (80% yield). <sup>1</sup>H NMR (400 MHz, CDCl<sub>3</sub>): δ 8.16 (d, *J* = 7.0 Hz, 1H), 7.58 – 7.55 (m, 2H), 7.44 – 7.31 (m, 2H), 7.13 – 7.05 (m, 1H), 7.01 – 6.90 (m, 2H), 6.69 (t, *J* = 6.8 Hz, 1H), 3.79 (s, 3H). <sup>13</sup>C NMR (100 MHz, CDCl<sub>3</sub>): δ 159.6, 145.8, 132.0, 129.6, 125.5, 123.9, 123.3, 121.6, 118.2, 114.7, 112.3, 55.4.

**3-(*m*-Tolyl)imidazo[1,2-*a*]pyridine (3n).**<sup>[4]</sup> Light yellow oil, 75 mg from 1-bromo-3-methylbenzene (72% yield, 30:70 EtOAc/hexane) and 83 mg from 1-iodo-3-methylbenzene (80% yield). <sup>1</sup>H NMR (400 MHz, CDCl<sub>3</sub>): δ 8.31 (d, *J* = 7.0 Hz, 1H), 7.66 (s, 1H), 7.64 (d, *J* = 9.1 Hz, 1H), 7.45 – 7.30 (m, 3H), 7.23 – 7.13 (m, 2H), 6.77 (t, *J* = 7.4 Hz, 1H), 2.41 (s, 3H). <sup>13</sup>C NMR (100 MHz, CDCl<sub>3</sub>): δ 146.1, 139.0, 132.5, 129.2, 129.1, 129.0, 128.7, 125.9, 125.0, 124.1, 123.4, 118.2, 112.4, 21.5.

**3-(3-Methoxyphenyl)imidazo[1,2-*a*]pyridine (3o).**<sup>[5]</sup> Light yellow solid, 80 mg from 1-bromo-3-methoxybenzene (71% yield, 30:70 EtOAc/hexane) and 83 mg from 1-iodo-3-methoxybenzene (74% yield). <sup>1</sup>H NMR (400 MHz, CDCl<sub>3</sub>): δ 8.30 (d, *J* = 6.9 Hz, 1H), 7.65 (s, 1H), 7.62 (d, *J* = 9.1 Hz, 1H), 7.36 (t, *J* = 7.9 Hz, 1H), 7.17 – 7.00 (m, 3H), 6.89 (dd, *J* = 8.3, 2.5 Hz, 1H), 6.74 (t, *J* = 6.8 Hz, 1H), 3.80 (s, 3H). <sup>13</sup>C NMR (100 MHz, CDCl<sub>3</sub>): δ 160.4, 146.2, 132.5, 130.6, 130.5, 125.8, 124.6, 123.7, 120.4, 118.3, 113.9, 113.7, 112.9, 55.6.

**3-(*o*-Tolyl)imidazo[1,2-*a*]pyridine (3p).**<sup>[6]</sup> Light yellow oil, 70 mg from 1-bromo-2-methylbenzene (67% yield, 30:70 EtOAc/hexane) and 82 mg from 1-iodo-2-methylbenzene (79% yield). <sup>1</sup>H NMR (400 MHz, CDCl<sub>3</sub>): δ 7.66 (d, *J* = 6.8 Hz, 1H), 7.60 (d, *J* = 9.2 Hz, 1H), 7.53 (s, 1H), 7.32 – 7.18 (m, 4H), 7.12 – 7.08 (m, 1H), 6.67 (t, *J* = 6.4 Hz, 1H), 2.07 (s, 3H); <sup>13</sup>C NMR (100 MHz, CDCl<sub>3</sub>): δ 145.5, 138.3, 132.8, 131.1, 130.7, 129.2, 128.2, 126.2, 124.6, 124.0, 123.6, 118.0, 112.2, 19.7.

**3-(Pyridin-2-yl)imidazo[1,2-*a*]pyridine (3q).**<sup>[2]</sup> Light Brownish solid, 56 mg from 2-bromopyridine (57% yield, 30:70 EtOAc/ hexane) and 50 mg from 2-iodopyridine (51% yield). <sup>1</sup>H NMR (400 MHz, CDCl<sub>3</sub>): δ 9.94 (d, *J* = 7.1 Hz, 1H), 8.65 (d, *J* = 4.9 Hz, 1H), 8.14 (s, 1H), 7.77 – 7.63 (m, 3H), 7.41 – 7.20 (m, 1H), 7.22 – 7.09 (m, 1H), 6.93 (t, *J* = 6.4 Hz, 1H). <sup>13</sup>C NMR (100 MHz, CDCl<sub>3</sub>): δ 150.7, 148.7, 147.6, 136.5, 134.7, 128.1, 125.5, 123.7, 120.9, 120.4, 117.6, 112.9.

**3-(Pyridin-3-yl)imidazo[1,2-*a*]pyridine (3r).**<sup>[1]</sup> Light yellow solid, 84 mg from 3-bromopyridine (86% yield, 30:70 EtOAc/ hexane) and 87 mg from 3-iodopyridine (89% yield). <sup>1</sup>H NMR (400 MHz, CDCl<sub>3</sub>): δ 8.75 (d, *J* = 4.3 Hz, 1H), 8.56 – 8.55 (m, 1H), 8.19 (d, *J* = 7.0 Hz, 1H), 7.82 – 7.73 (m, 1H), 7.66 (s, 1H), 7.60 (d, *J* = 9.1 Hz, 1H), 7.38 – 7.34 (m, 1H), 7.17 – 7.12 (m, 1H), 6.79 – 6.75 (m, 1H). <sup>13</sup>C NMR (100 MHz, CDCl<sub>3</sub>): δ 149.2, 148.8, 146.6, 135.1, 133.3, 125.6, 124.8, 123.9, 123.0, 122.3, 118.4, 113.1.

**3-(Naphthalen-1-yl)imidazo[1,2-*a*]pyridine (3s).**<sup>[1]</sup> Light yellow oil, 93 mg from 1-iodonaphthalene (76% yield, 30:70 EtOAc/hexane). <sup>1</sup>H NMR (400 MHz, CDCl<sub>3</sub>): δ 7.89 – 7.84 (m, 2H), 7.73 (s, 1H), 7.69 (d, *J* = 9.1 Hz, 1H), 7.59 (d, *J* = 6.8 Hz, 1H), 7.49 (d, *J* = 4.9 Hz, 2H), 7.47 – 7.40 (m, 2H), 7.33 – 7.28 (m, 1H), 7.16 – 7.08 (m, 1H), 6.57 (t, *J* = 6.7 Hz, 1H). <sup>13</sup>C NMR (100 MHz, CDCl<sub>3</sub>): δ 146.0, 134.1, 133.9, 132.2, 129.8, 129.3, 128.9, 127.2, 126.6, 126.4, 125.8, 125.3, 124.6, 124.3, 123.9, 118.1, 112.5.

**1,2-Dimethyl-5-phenyl-1H-imidazole (4a).**<sup>[7]</sup> Light yellow solid, 78 mg from bromobenzene (91% yield, 60:40 EtOAc/hexane) and 74 mg from iodobenzene (86% yield). <sup>1</sup>H-NMR (400 MHz, CDCl<sub>3</sub>): δ 7.31 – 7.26 (m, 2H), 7.25 – 7.20 (m, 3H), 6.83 (s, 1H), 3.38 (s, 3H), 2.31 (s, 3H). <sup>13</sup>C-NMR (100 MHz, CDCl<sub>3</sub>): δ 145.9, 133.5, 130.5, 128.6, 128.5, 127.6, 125.7, 31.3, 13.6.

**1,2-Dimethyl-5-(4-nitrophenyl)-1H-imidazole (4b).**<sup>[7]</sup> Yellow solid, 100 mg from 1-bromo-4-nitrobenzene (92% yield, 60:40 EtOAc/hexane) and 92 mg from 1-iodo-4-nitrobenzene (85% yield). <sup>1</sup>H-

**NMR (400 MHz, CDCl<sub>3</sub>):**  $\delta$  8.24 – 8.20 (m, 2H), 7.48 – 7.45 (m, 2H), 7.06 (s, 1H), 3.55 (s, 3H), 2.42 (s, 3H). **<sup>13</sup>C-NMR (100 MHz, CDCl<sub>3</sub>):**  $\delta$  153.7, 148.0, 146.7, 136.9, 131.4, 128.2, 124.2, 31.8, 13.8.

**4-(1,2-Dimethyl-1H-imidazol-5-yl)benzotrile (4c).**<sup>[7]</sup> White solid, 86 mg from 4-bromobenzotrile (87% yield, 60:40 EtOAc/hexane) and 82 mg from 4-iodobenzotrile (83% yield). **<sup>1</sup>H-NMR (400 MHz, CDCl<sub>3</sub>):**  $\delta$  7.64 (d, *J* = 8.3 Hz, 2H), 7.40 (d, *J* = 8.3 Hz, 2H), 7.00 (s, 1H), 3.51 (s, 3H), 2.40 (s, 3H). **<sup>13</sup>C-NMR (100 MHz, CDCl<sub>3</sub>):**  $\delta$  147.7, 135.1, 132.6, 131.9, 128.3, 127.9, 118.7, 110.8, 31.5, 13.9.

**5-(4-methoxyphenyl)-1,2-dimethyl-1H-imidazole (4d).**<sup>[7]</sup> White solid, 55 mg from 1-bromo-4-methoxybenzene (54% yield, 60:40 EtOAc/hexane) and 63 mg from 1-iodo-4-methoxybenzene (62% yield). **<sup>1</sup>H-NMR (400 MHz, CDCl<sub>3</sub>):**  $\delta$  7.18 (d, *J* = 8.6 Hz, 2H), 6.87 (d, *J* = 8.7 Hz, 2H), 6.80 (s, 1H), 3.75 (s, 3H), 3.39 (s, 3H), 2.35 (s, 3H). **<sup>13</sup>C-NMR (100 MHz, CDCl<sub>3</sub>):**  $\delta$  159.3, 145.4, 133.3, 130.1, 125.1, 122.9, 114.1, 55.3, 31.2, 13.7.

**2,3-Diphenylindolizine (4e).**<sup>[8]</sup> Brown oil, 118 mg from bromobenzene (85% yield, 5:95 EtOAc/hexane) and 126 mg from iodobenzene (90% yield). **<sup>1</sup>H NMR (400 MHz, CDCl<sub>3</sub>):**  $\delta$  7.86 (d, *J* = 7.4 Hz, 1H), 7.40 – 7.27 (m, 6H), 7.26 – 7.21 (m, 2H), 7.19 – 7.06 (m, 3H), 6.64 – 6.56 (m, 2H), 6.38 – 6.28 (m, 1H). **<sup>13</sup>C NMR (100 MHz, CDCl<sub>3</sub>):**  $\delta$  136.1, 132.7, 131.9, 131.0, 129.1, 128.9, 128.2, 127.9, 127.8, 126.1, 122.3, 121.5, 119.1, 117.5, 110.5, 99.4.

**3-(4-Nitrophenyl)-2-phenylindolizine (4f).**<sup>[9]</sup> Orange solid, 153 mg from 1-bromo-4-nitrobenzene (94% yield, 6:94 EtOAc/hexane) and 156 mg from 1-iodo-4-nitrobenzene (96% yield). **<sup>1</sup>H NMR (400 MHz, CDCl<sub>3</sub>):**  $\delta$  8.17 (d, *J* = 9.1 Hz, 2H), 8.05 – 8.01 (m, 1H), 7.47 (d, *J* = 9.1 Hz, 2H), 7.38 (d, *J* = 9.0 Hz, 1H), 7.24 – 7.13 (m, 5H), 6.77 – 6.65 (m, 1H), 6.62 (s, 1H), 6.52 – 6.43 (m, 1H). **<sup>13</sup>C NMR (100 MHz, CDCl<sub>3</sub>):**  $\delta$  146.4, 138.5, 135.4, 134.1, 130.8, 130.1, 129.2, 128.5, 126.8, 124.3, 121.8, 119.5, 119.2, 118.9, 111.6, 101.3.

**4-(2-Phenylindolizin-3-yl)benzotrile (4g).** Light brown solid, 122 mg from 4-bromobenzotrile (80% yield, mp 126.0–127.0 °C, 5:95 EtOAc/hexane) and 142 mg from 4-iodobenzotrile (93% yield). **<sup>1</sup>H NMR (400 MHz, CDCl<sub>3</sub>):**  $\delta$  8.07 (d, *J* = 7.0 Hz, 1H), 7.71 (d, *J* = 8.3 Hz, 2H), 7.51 (d, *J* = 8.3 Hz, 2H), 7.47 (d, *J* = 9.0 Hz, 1H), 7.35 – 7.24 (m, 5H), 6.83 – 6.73 (m, 1H), 6.72 (s, 1H), 6.58 – 6.50 (m, 1H). **<sup>13</sup>C NMR (100 MHz, CDCl<sub>3</sub>):**  $\delta$  136.5, 135.4 (2C), 133.8, 132.7, 131.0, 129.6, 129.2, 128.5, 126.7, 121.8, 119.4, 118.9, 118.6, 111.4, 110.7, 100.9. **HRMS (ESI-TOF) m/z:** [M + H]<sup>+</sup> calcd for C<sub>21</sub>H<sub>15</sub>N<sub>2</sub>, 295.1230; found 295.1225.

**2-Phenyl-3-(*p*-tolyl)indolizine (4h).**<sup>[8]</sup> Brown oil, 110 mg from 1-bromo-4-methylbenzene (75% yield, 4:96 EtOAc/hexane) and 136 mg from 1-iodo-4-methylbenzene (93% yield). **<sup>1</sup>H NMR (400 MHz, CDCl<sub>3</sub>):**

$\delta$  7.86 – 7.78 (m, 1H), 7.31 (d,  $J$  = 9.0 Hz, 1H), 7.27 – 7.22 (m, 2H), 7.22 – 7.11 (m, 6H), 7.11 – 7.04 (m, 1H), 6.64 – 6.53 (m, 2H), 6.37 – 6.25 (m, 1H), 2.33 (s, 3H).  $^{13}\text{C}$  NMR (100 MHz,  $\text{CDCl}_3$ ):  $\delta$  137.6, 136.2, 132.6, 130.9, 129.9, 128.9, 128.2 (2C), 127.7, 126.1, 122.4, 121.6, 119.1, 117.3, 110.4, 99.3, 21.4.

**5-Phenylfuran-2-carbonitrile (4i).**<sup>[10]</sup> White solid, 64 mg from bromobenzene (70% yield, 2:98 EtOAc/hexane) and 69 mg from iodobenzene (75% yield).  $^1\text{H}$  NMR (400 MHz,  $\text{CDCl}_3$ ):  $\delta$  7.77 – 7.71 (m, 2H), 7.51 – 7.37 (m, 3H), 7.19 (d,  $J$  = 3.7 Hz, 1H), 6.75 (d,  $J$  = 3.7 Hz, 1H).  $^{13}\text{C}$  NMR (100 MHz,  $\text{CDCl}_3$ ):  $\delta$  158.7, 129.5, 129.0, 128.7, 125.1, 124.9, 124.0, 111.9, 106.0.

**5-(4-Acetylphenyl)furan-2-carbonitrile (4j).**<sup>[11]</sup> White solid, 103 mg from 4'-bromoacetophenone (91% yield, 7:93 EtOAc/hexane) and 93 mg from 4'-iodoacetophenone (82% yield).  $^1\text{H}$  NMR (400 MHz,  $\text{CDCl}_3$ ):  $\delta$  8.05 (d,  $J$  = 8.5 Hz, 2H), 7.83 (d,  $J$  = 8.5 Hz, 2H), 7.22 (d,  $J$  = 3.7 Hz, 1H), 6.89 (d,  $J$  = 3.7 Hz, 1H).  $^{13}\text{C}$  NMR (100 MHz,  $\text{CDCl}_3$ ):  $\delta$  197.1, 157.3, 137.3, 132.5, 129.1, 126.1, 124.9, 123.9, 111.5, 108.0, 26.7.

**5-(4-Cyanophenyl)furan-2-carbonitrile (4k).**<sup>[12]</sup> White solid, 91 mg from 4-bromobenzonitrile (87% yield, 3:97 EtOAc/hexane) and 96 mg from 4-iodobenzonitrile (92% yield).  $^1\text{H}$  NMR (400 MHz,  $\text{CDCl}_3$ ):  $\delta$  7.75 (d,  $J$  = 8.5 Hz, 2H), 7.66 (d,  $J$  = 8.5 Hz, 2H), 7.14 (d,  $J$  = 3.7 Hz, 1H), 6.83 (d,  $J$  = 3.7 Hz, 1H).  $^{13}\text{C}$  NMR (100 MHz,  $\text{CDCl}_3$ ):  $\delta$  156.2, 132.9, 132.3, 126.6, 125.2, 123.9, 118.2, 112.8, 111.3, 108.7.

**5-(*p*-Tolyl)furan-2-carbonitrile (4l).**<sup>[13]</sup> White-off solid, 45 mg from 1-bromo-4-methylbenzene (45% yield, 2:98 EtOAc/hexane) and 62 mg from 1-iodo-4-methylbenzene (63% yield).  $^1\text{H}$  NMR (400 MHz,  $\text{CDCl}_3$ ):  $\delta$  7.63 (d,  $J$  = 8.2 Hz, 2H), 7.27 (d,  $J$  = 8.2 Hz, 2H), 7.17 (d,  $J$  = 3.7 Hz, 1H), 6.69 (d,  $J$  = 3.7 Hz, 1H), 2.42 (s, 3H).  $^{13}\text{C}$  NMR (100 MHz,  $\text{CDCl}_3$ ):  $\delta$  159.0, 139.8, 129.7, 126.1, 124.8, 124.8, 124.0, 112.1, 105.3, 21.4.

**2-(4-(Methylsulfonyl)phenyl)-3-phenylimidazo[1,2-*a*]pyridine (6a).**<sup>[14]</sup> Light Brown solid, from bromobenzene (trace) and 168 mg from iodobenzene (96% yield, 10:90 EtOAc/hexane).  $^1\text{H}$  NMR (400 MHz,  $\text{CDCl}_3$ ):  $\delta$  7.84 (d,  $J$  = 6.9 Hz, 1H), 7.78 (d,  $J$  = 8.5 Hz, 2H), 7.73 (d,  $J$  = 8.5 Hz, 2H), 7.59 (d,  $J$  = 9.1 Hz, 1H), 7.52 – 7.41 (m, 3H), 7.37 – 7.32 (m, 2H), 7.19 – 7.11 (m, 1H), 6.69 (t,  $J$  = 6.8 Hz, 1H), 2.95 (s, 3H).  $^{13}\text{C}$  NMR (100 MHz,  $\text{CDCl}_3$ ):  $\delta$  145.0, 140.1, 139.9, 138.8, 130.6, 129.9, 129.5, 129.1, 128.5, 127.3, 125.5, 123.6, 122.7, 117.7, 112.9, 44.5.

**2-(4-(Methylsulfonyl)phenyl)-3-(4-nitrophenyl)imidazo[1,2-*a*]pyridine (6b).** Yellow solid, 173 mg from 1-bromo-4-nitrobenzene (88% yield, mp 123.0-124.0 °C, 10:90 EtOAc/hexane) and 182 mg from 1-iodo-4-nitrobenzene (93% yield).  $^1\text{H}$  NMR (400 MHz,  $\text{CDCl}_3$ ):  $\delta$  8.33 (d,  $J$  = 8.7 Hz, 2H), 7.97 (d,  $J$  = 7.0 Hz, 1H), 7.80 (d,  $J$  = 8.5 Hz, 2H), 7.72 (d,  $J$  = 8.5 Hz, 2H), 7.65 (d,  $J$  = 9.1 Hz, 1H), 7.59 (d,  $J$  = 8.7 Hz, 2H), 7.32 – 7.22 (m, 1H), 6.86 – 6.77 (m, 1H), 2.99 (s, 3H).  $^{13}\text{C}$  NMR (100 MHz,  $\text{CDCl}_3$ ):  $\delta$  147.9, 145.8, 141.9,



139.7, 139.2, 135.9, 131.3, 129.0, 127.6, 126.4, 125.0, 123.1, 120.1, 118.2, 113.8, 44.5. **HRMS (ESI-TOF) m/z:** [M + H]<sup>+</sup> calcd for C<sub>20</sub>H<sub>16</sub>N<sub>3</sub>O<sub>4</sub>S, 394.0856; found 394.0857.

**4-(2-(4-(Methylsulfonyl)phenyl)imidazo[1,2-*a*]pyridin-3-yl)benzotrile (6c).** White-off solid, 150 mg from 4-bromobenzotrile (80% yield, mp 242.0-243.0 °C, 10:90 EtOAc/hexane) and 155 mg from 4-iodobenzotrile (83% yield). **<sup>1</sup>H NMR (400 MHz, CDCl<sub>3</sub>):** δ 7.93 (d, *J* = 6.9 Hz, 1H), 7.83 – 7.86 (m, 4H), 7.72 (d, *J* = 8.3 Hz, 2H), 7.66 (d, *J* = 9.1 Hz, 1H), 7.53 (d, *J* = 8.3 Hz, 2H), 7.29 – 7.22 (m, 1H), 6.80 (t, *J* = 6.7 Hz, 1H), 2.99 (s, 3H). **<sup>13</sup>C NMR (100 MHz, CDCl<sub>3</sub>):** δ 145.7, 141.6, 139.6, 139.2, 134.0, 133.5, 131.1, 128.9, 127.6, 126.2, 123.0, 120.4, 118.2, 118.1, 113.6, 113.1, 44.5. **HRMS (ESI-TOF) m/z:** [M + H]<sup>+</sup> calcd for C<sub>21</sub>H<sub>16</sub>N<sub>3</sub>O<sub>2</sub>S, 374.0958; found 374.0954.

**2-(4-(Methylsulfonyl)phenyl)-3-(*p*-tolyl)imidazo[1,2-*a*]pyridine (6d).** yellow solid, from 1-bromo-4-methylbenzene (trace) and 149 mg from 1-iodo-4-methylbenzene (82% yield, mp 178.9-179.9 °C, 8:92 EtOAc/hexane). **<sup>1</sup>H NMR (400 MHz, CDCl<sub>3</sub>):** δ 7.83 (d, *J* = 7.0 Hz, 1H), 7.80 (d, *J* = 8.6 Hz, 2H), 7.74 (d, *J* = 8.6 Hz, 2H), 7.58 (d, *J* = 9.1 Hz, 1H), 7.28 (d, *J* = 8.0 Hz, 2H), 7.23 (d, *J* = 8.0 Hz, 2H), 7.17 – 7.12 (m, 1H), 6.70 – 6.65 (m, 1H), 2.95 (s, 3H), 2.39 (s, 3H). **<sup>13</sup>C NMR (100 MHz, CDCl<sub>3</sub>):** δ 144.9, 140.0, 139.96, 139.6, 138.7, 130.6, 130.5, 128.4, 127.3, 126.0, 125.4, 123.6, 122.8, 117.7, 112.7, 44.5, 21.5. **HRMS (ESI-TOF) m/z:** [M + H]<sup>+</sup> calcd for C<sub>21</sub>H<sub>18</sub>N<sub>2</sub>O<sub>2</sub>S, 363.1162; found 363.1158.

## References

- [1] H. Kilic, M. Turgut, M. S. Yilmaz, O. Dalkilic, O. Metin, *ACS Sustain. Chem. Eng.* **2018**, *6*, 11433-11440.
- [2] H. Y. Fu, L. Chen, H. Doucet, *J. Org. Chem.* **2012**, *77*, 4473-4478.
- [3] S. Kalari, D. A. Babar, U. B. Karale, V. B. Makane, H. B. Rode, *Tetrahedron Lett.* **2017**, *58*, 2818-2821.
- [4] Q.-X. Liu, B.-Y. He, P.-C. Qian, L.-X. Shao, *Org. Biomol. Chem.* **2017**, *15*, 1151-1154.
- [5] a) S. Roy, H. Khatua, S. K. Das, B. Chattopadhyay, *Angew. Chem.* **2019**, *131*, 11561-11565; b) S. Roy, H. Khatua, S. K. Das, B. Chattopadhyay, *Angew. Chem. Int. Ed.* **2019**, *58*, 11439-11443.
- [6] A. Gernet, N. Sevrain, J.-N. Volle, T. Ayad, J.-L. Pirat, D. Virieux, *J. Org. Chem.* **2020**, *85*, 14730-14743.
- [7] D. Nandi, S. S. Siwal, K. Mallick, *ChemistrySelect.* **2017**, *2*, 1747-1752.
- [8] R. Bonneau, Y. N. Romashin, M. T. Liu, *J. Photochem. Photobiol., A.* **1999**, *126*, 31-36.
- [9] J. Zhou, Y. Hu, H. Hu, *Synthesis.* **1999**, *01*, 166-170.
- [10] K. Okamoto, M. Watanabe, M. Murai, R. Hatano, K. Ohe, *Chem. Commun.* **2012**, *48*, 3127-3129.
- [11] N. Friebe, K. Schreiter, J. Kübel, B. Dietzek, N. Moszner, P. Burtscher, A. Oehlke, S. Spange, *New J. Chem.* **2015**, *39*, 5171-5179.
- [12] J. J. Dong, J. Roger, F. Požgan, H. Doucet, *Green Chem.* **2009**, *11*, 1832-1846.
- [13] S. K. Kariofillis, B. J. Shields, M. A. Tekle-Smith, M. J. Zacuto, A. G. Doyle, *J. Am. Chem. Soc.* **2020**, *142*, 7683-7689.
- [14] R. Kumar, C. Ravi, D. Rawat, S. Adimurthy, *Eur. J. Org. Chem.* **2018**, *14*, 1665-1673.

# NMR Spectra

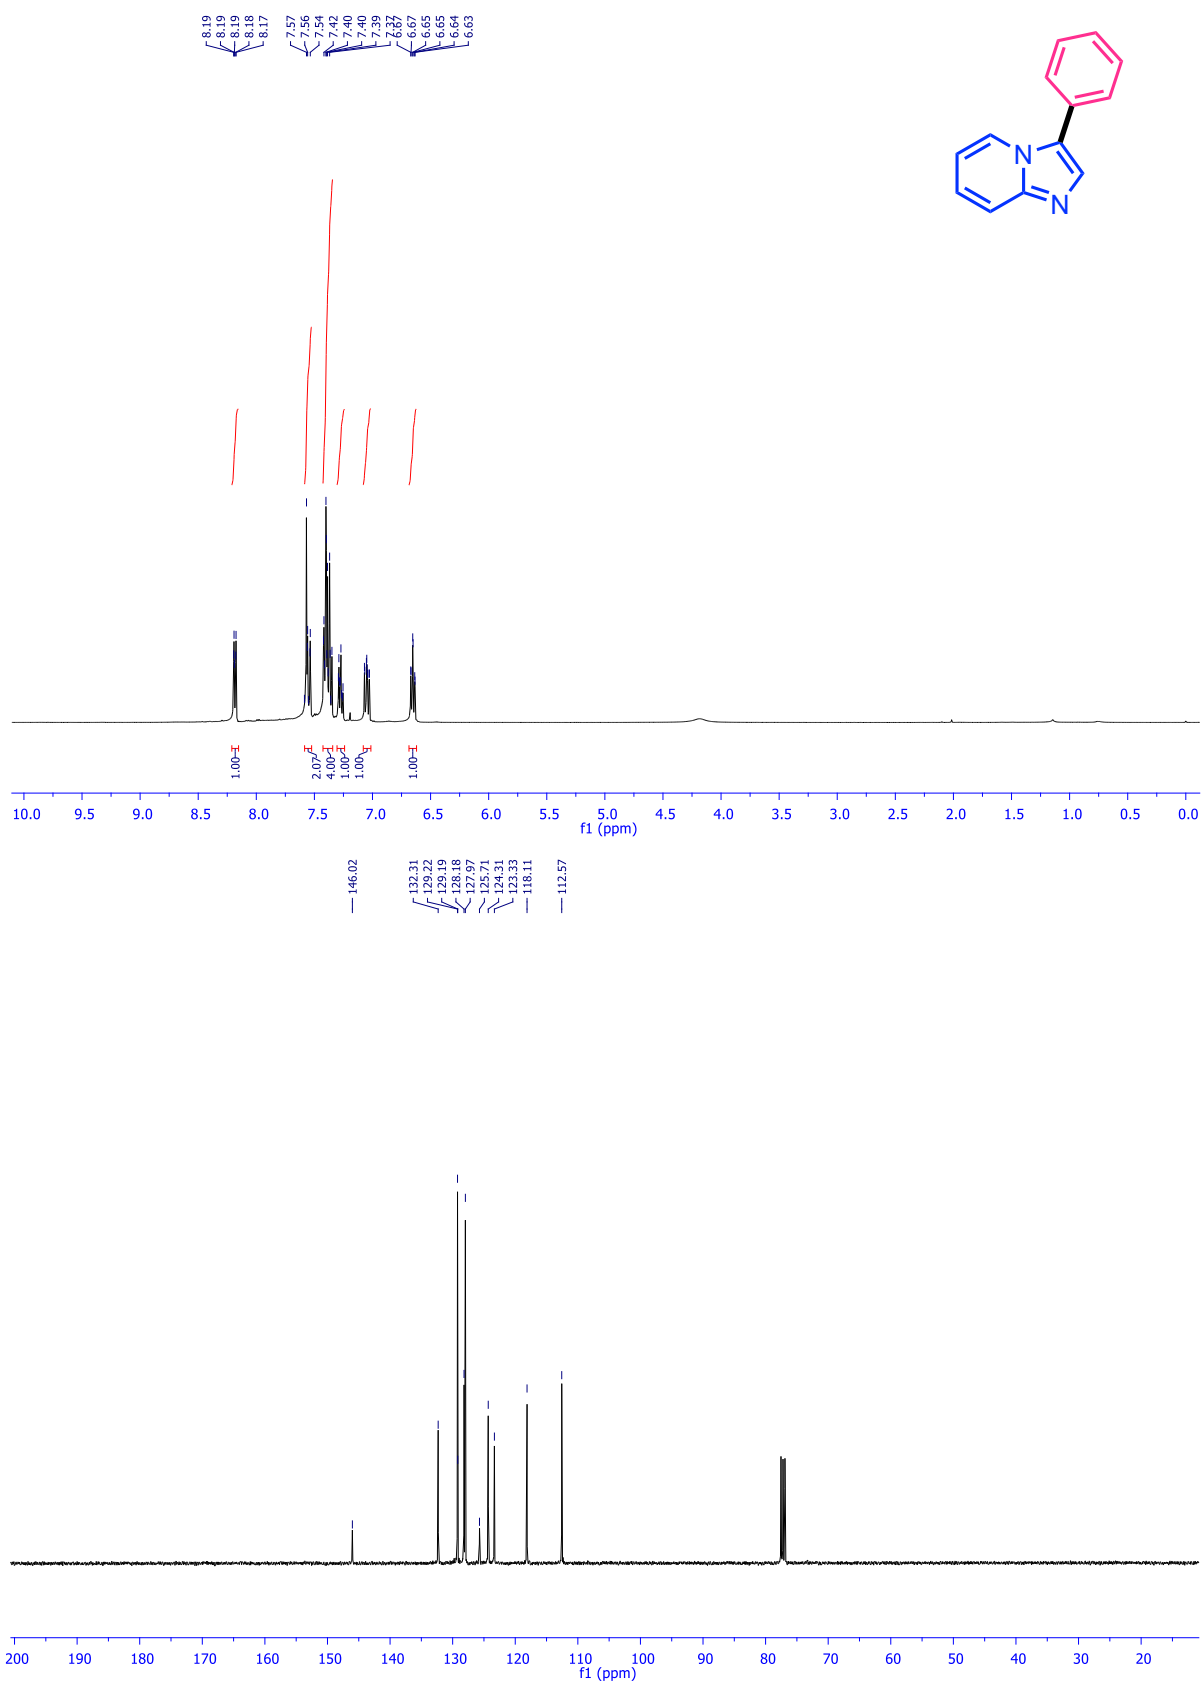

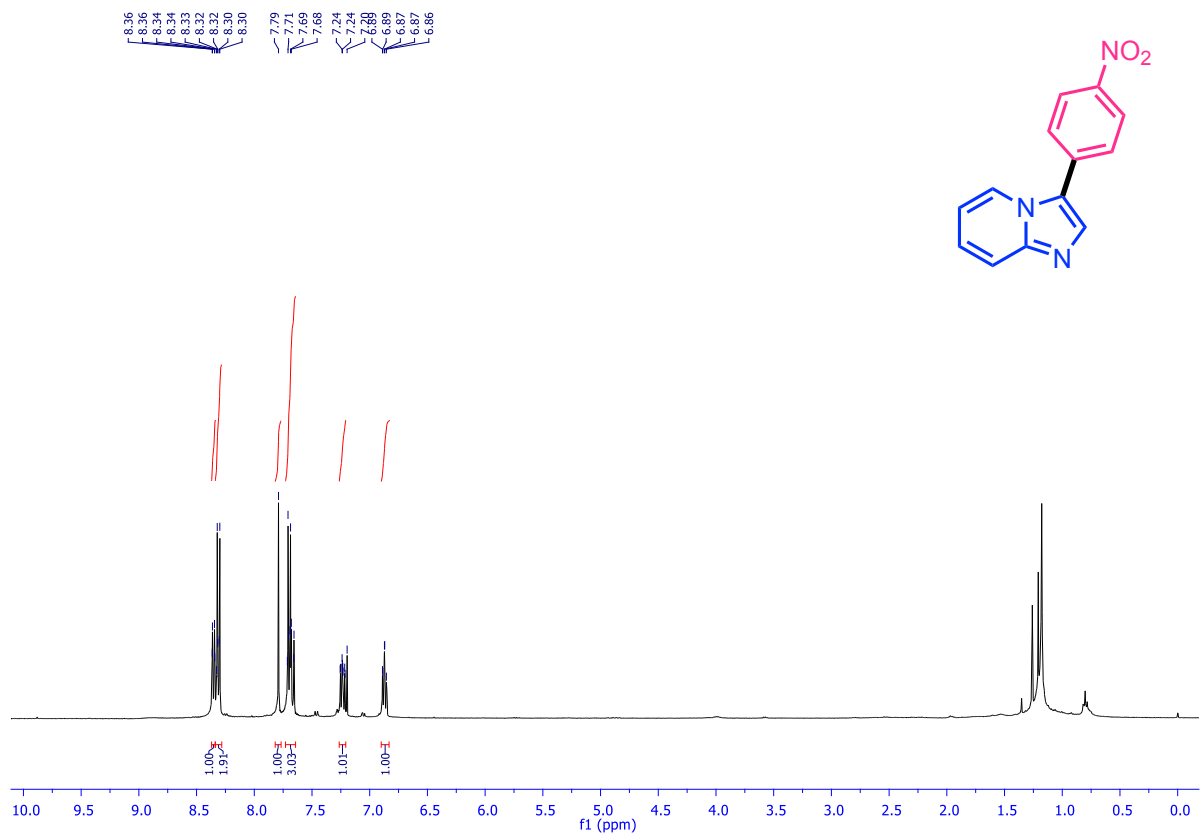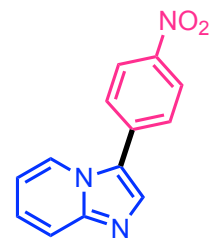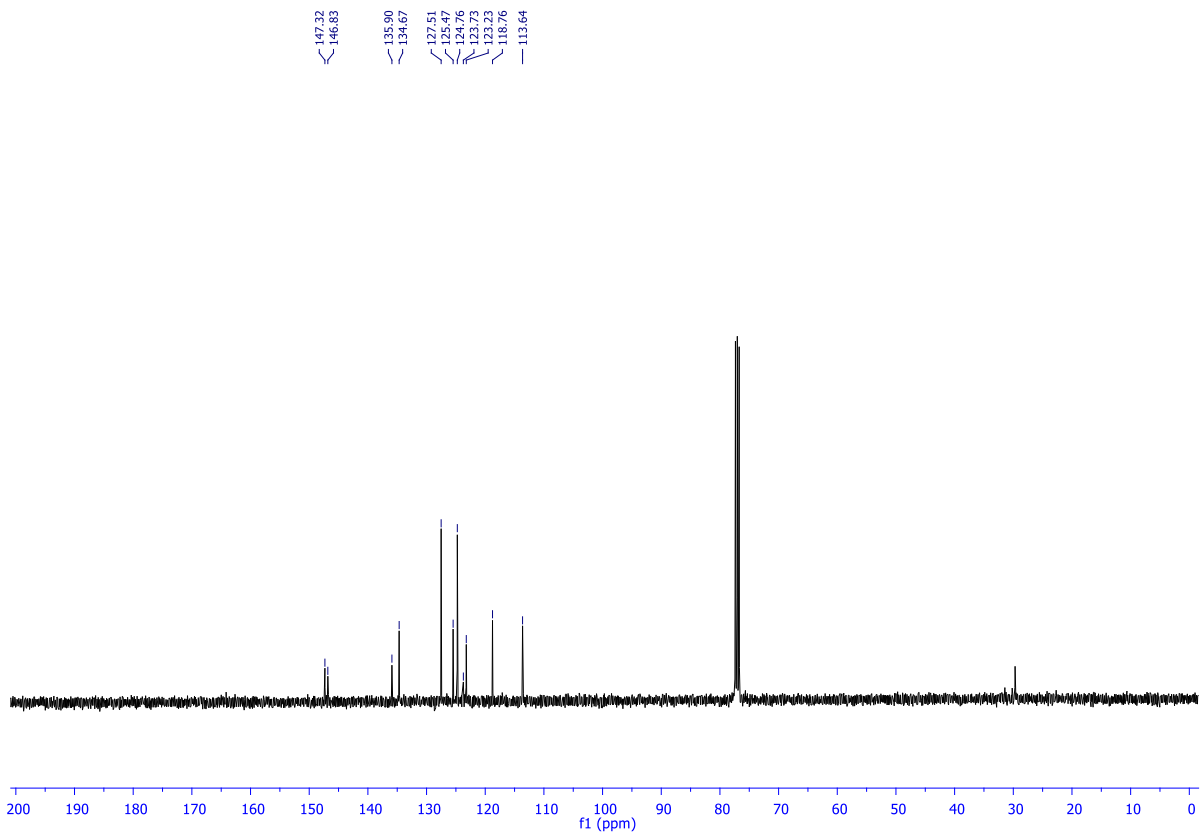

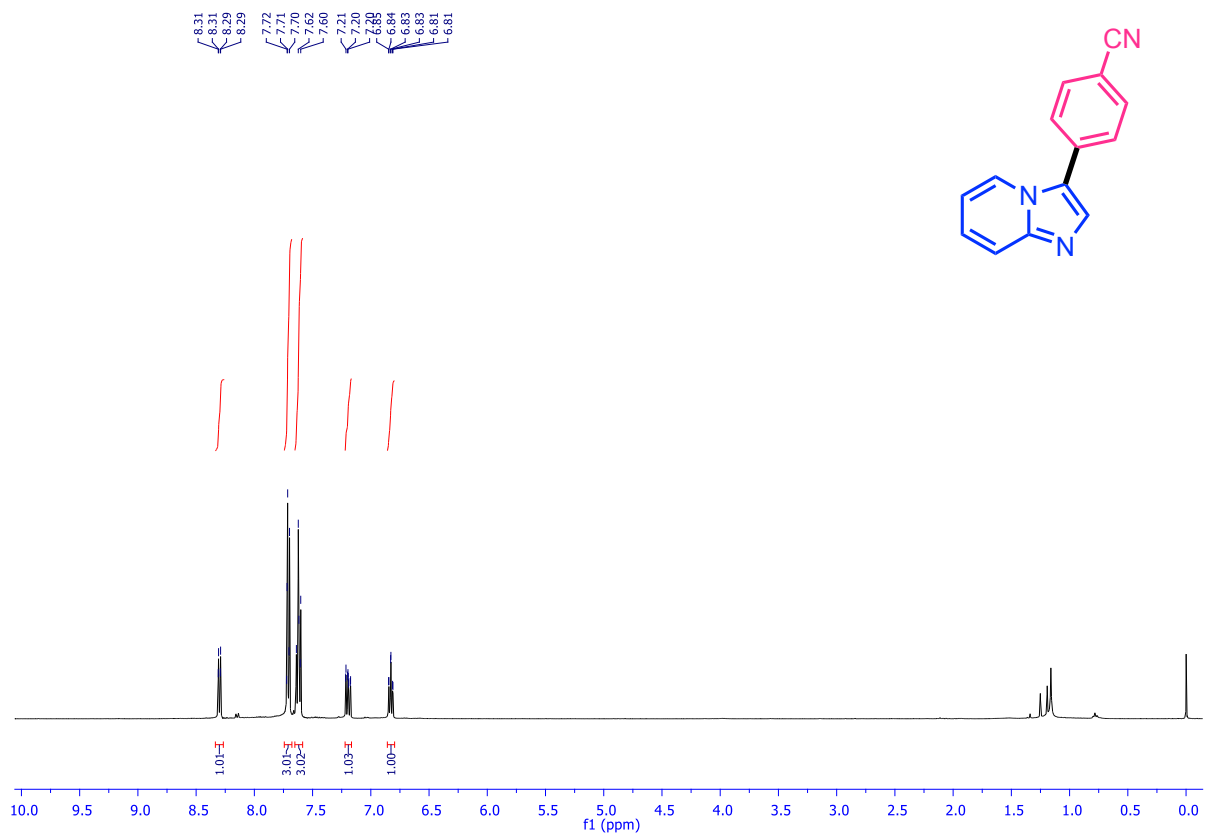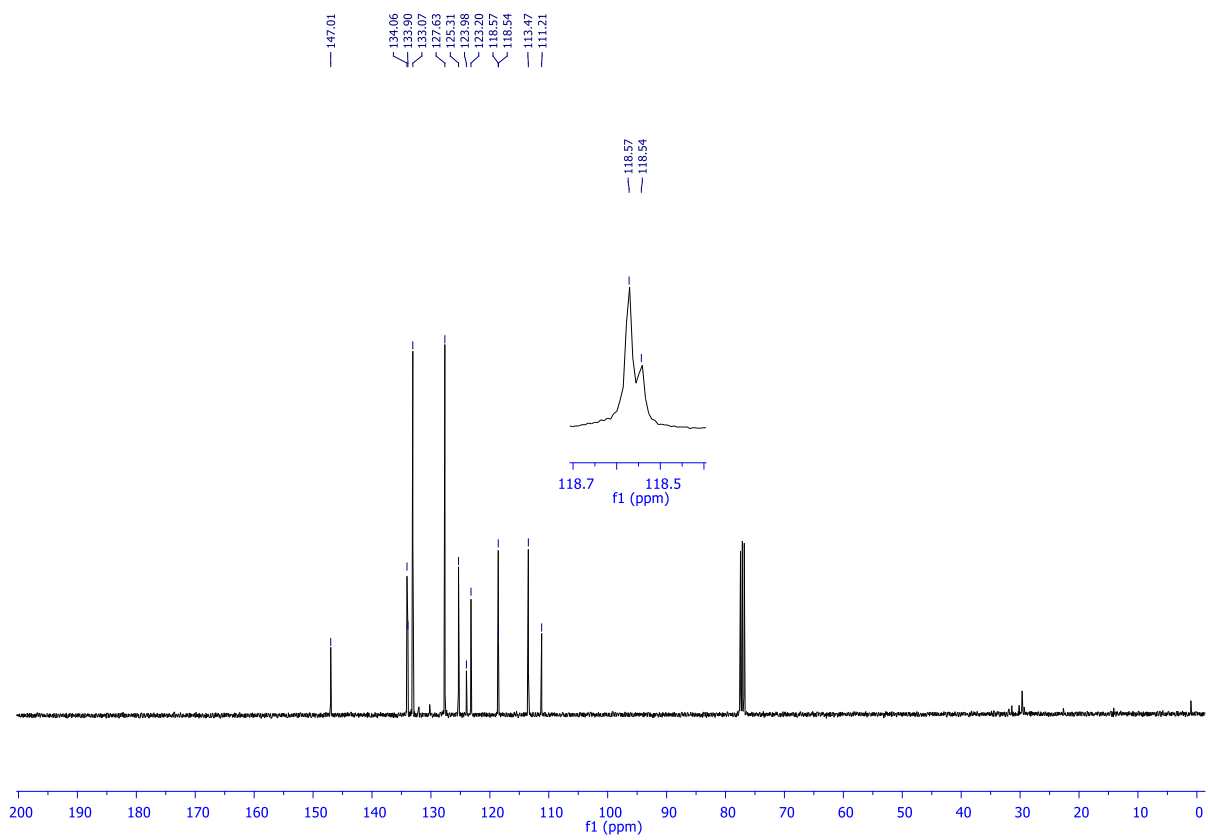

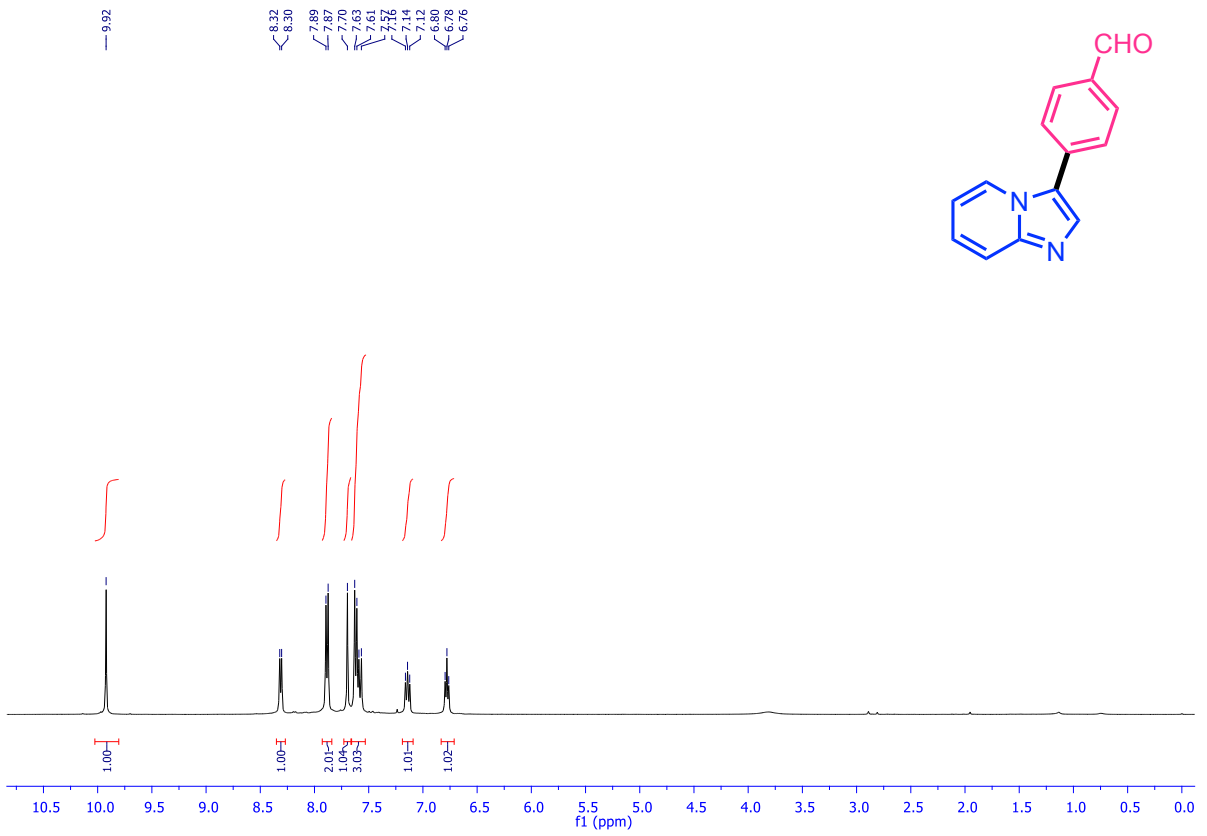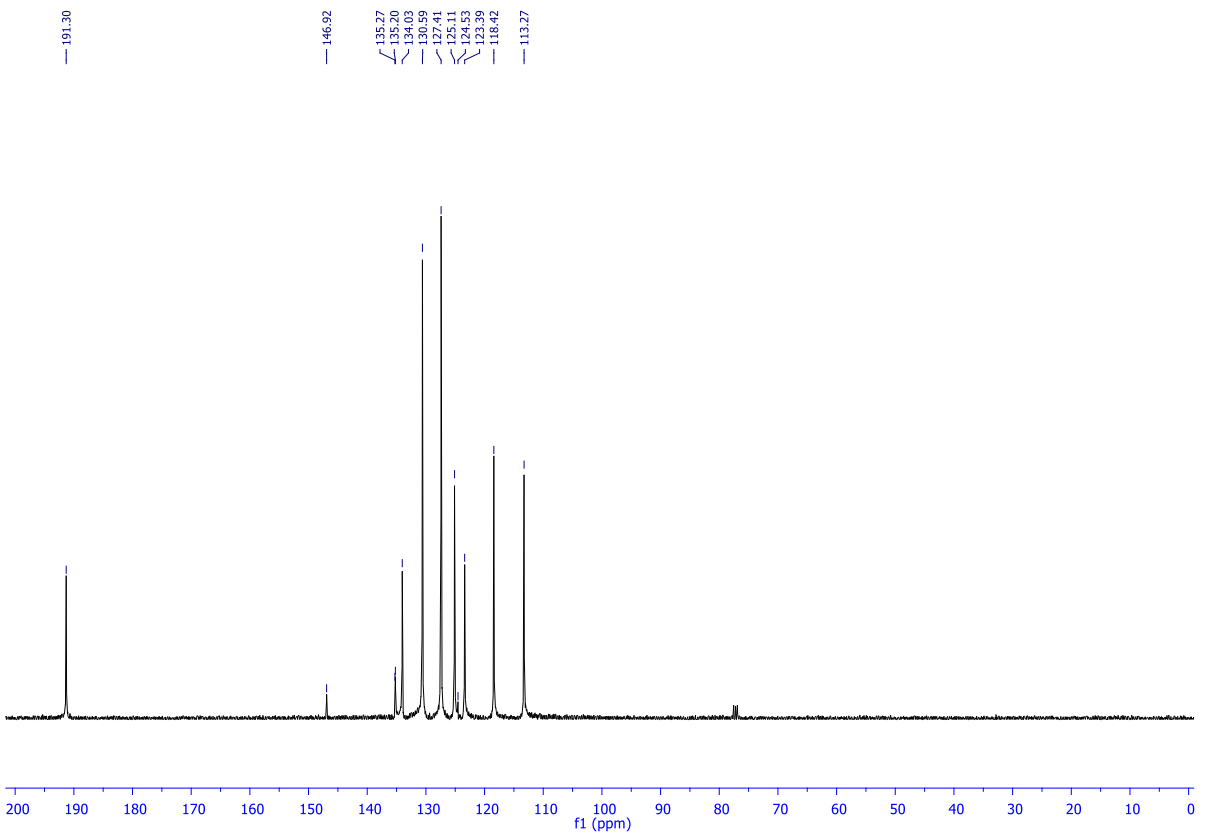

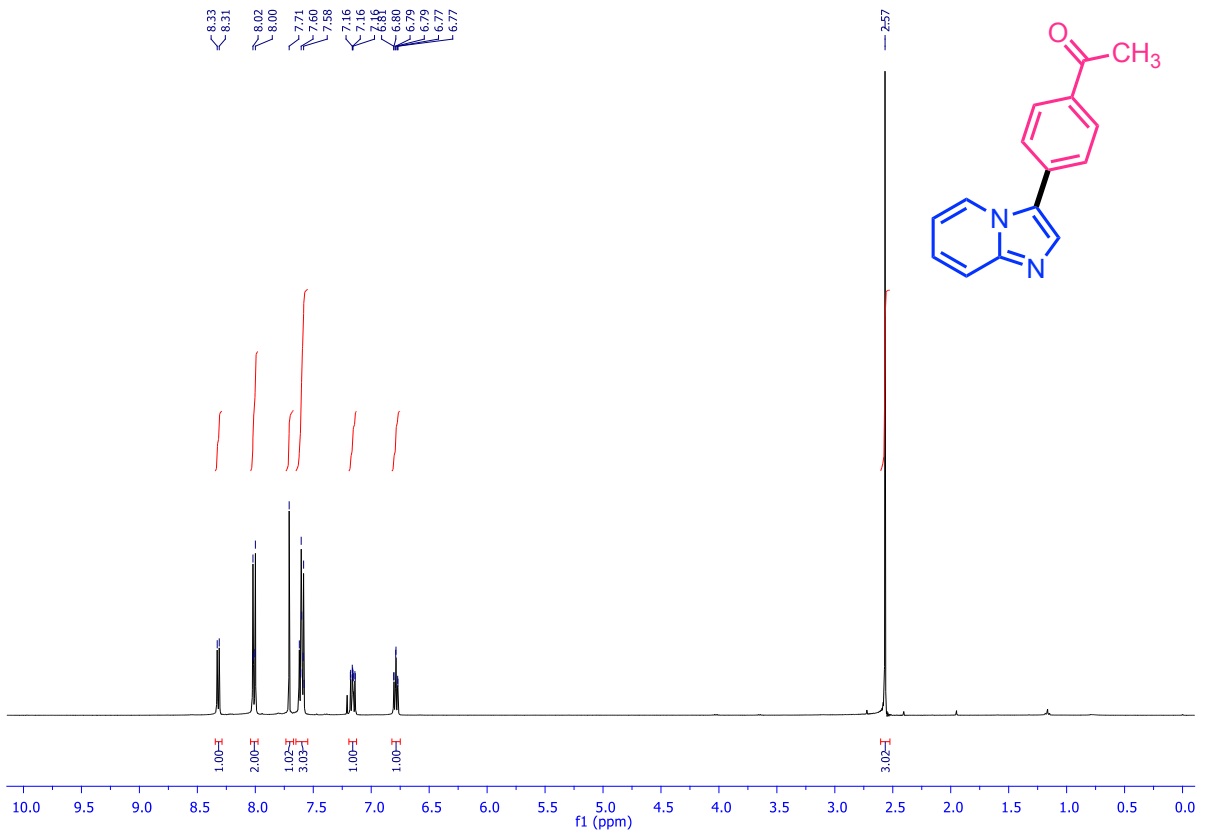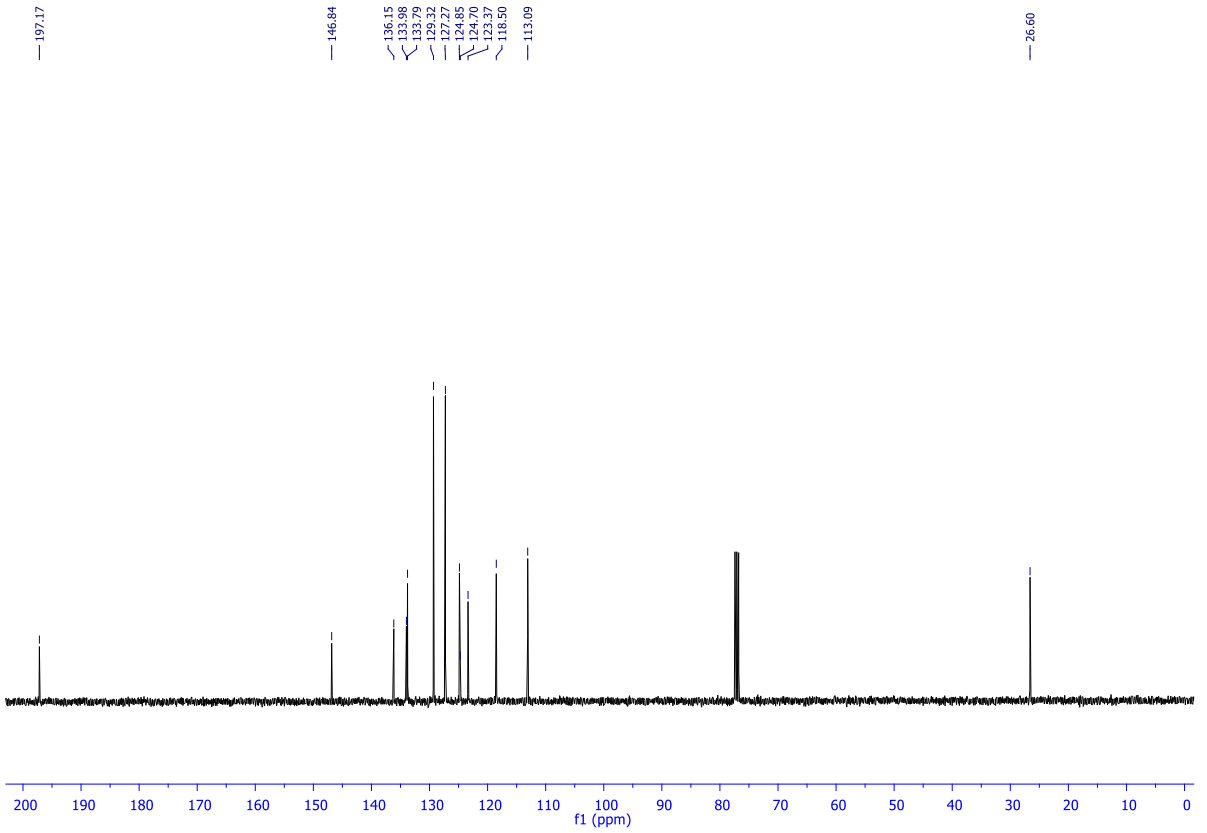

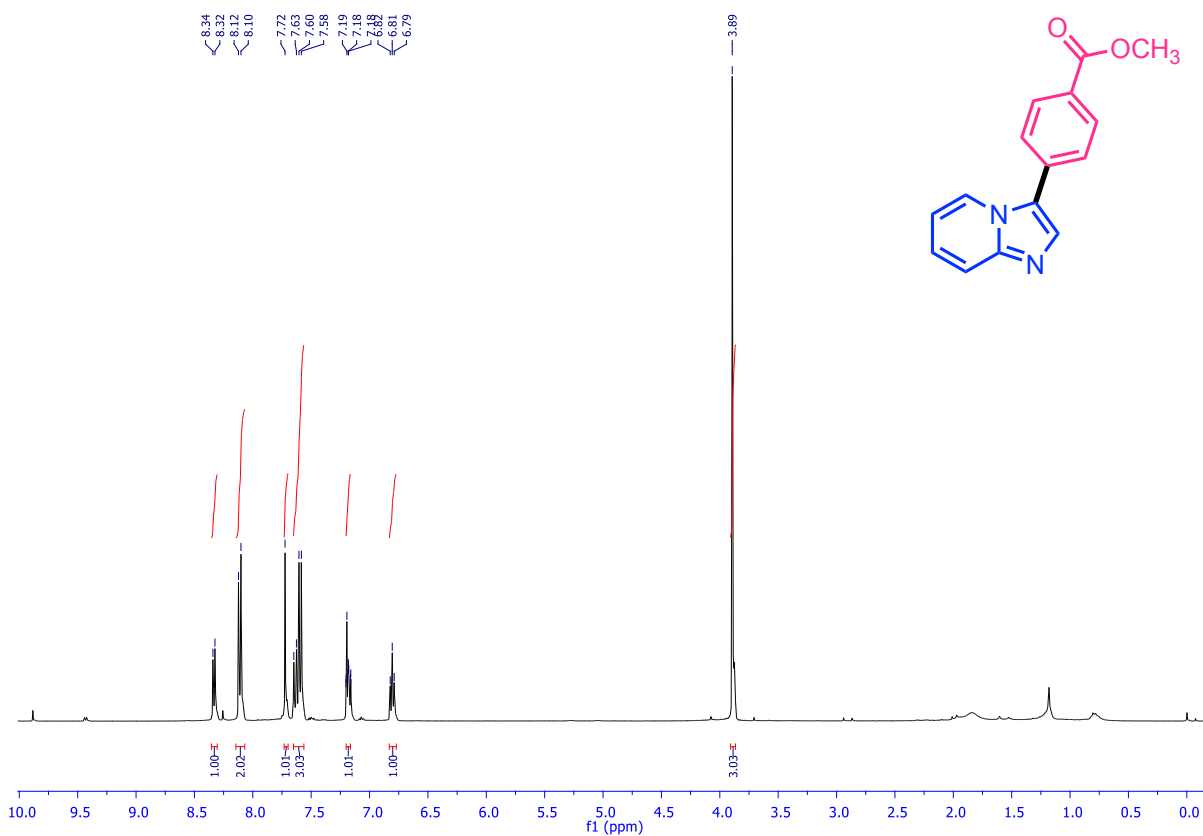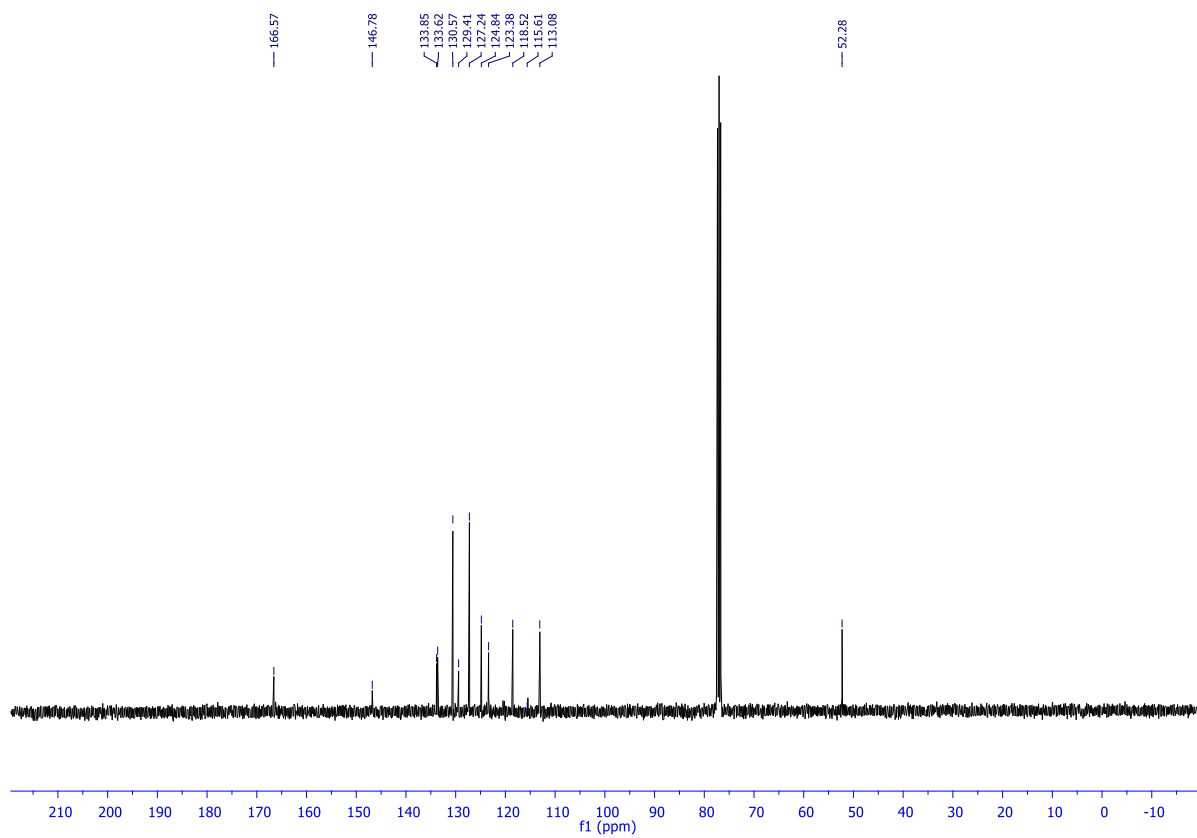

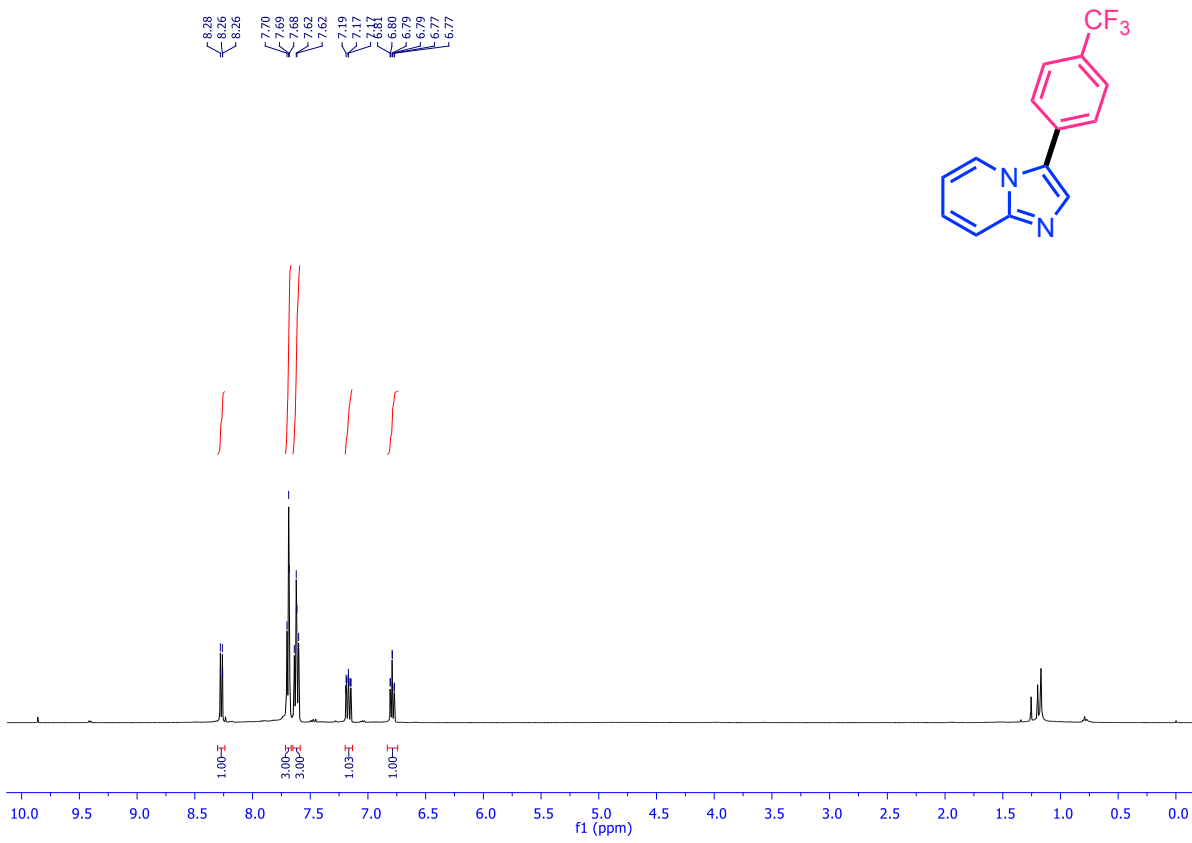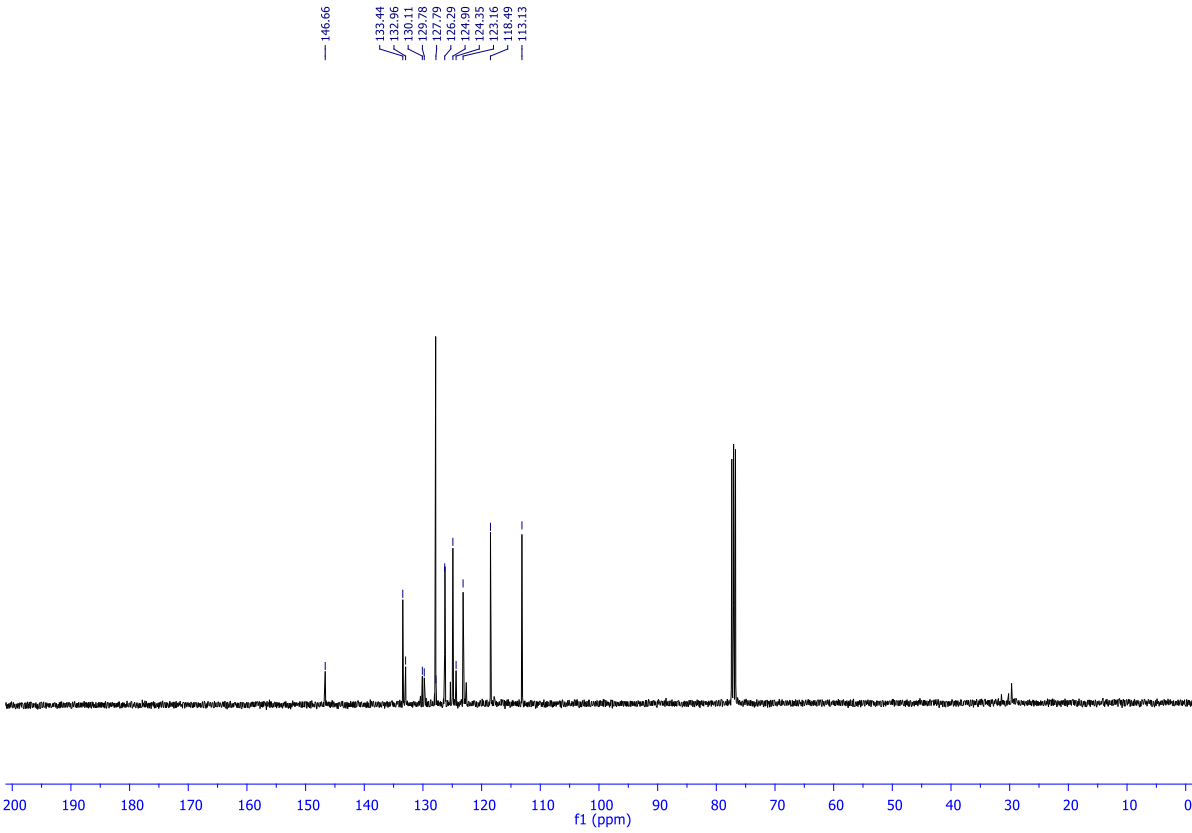



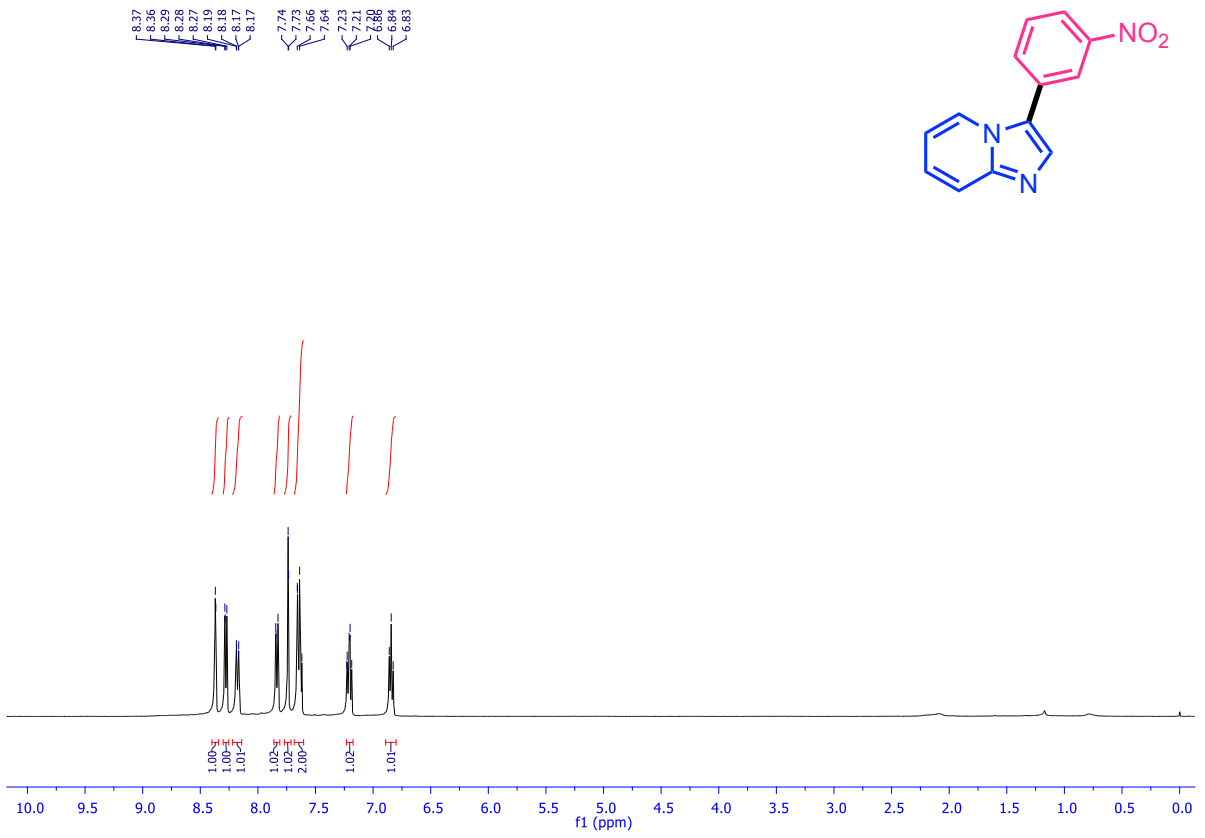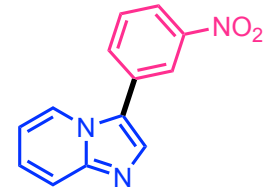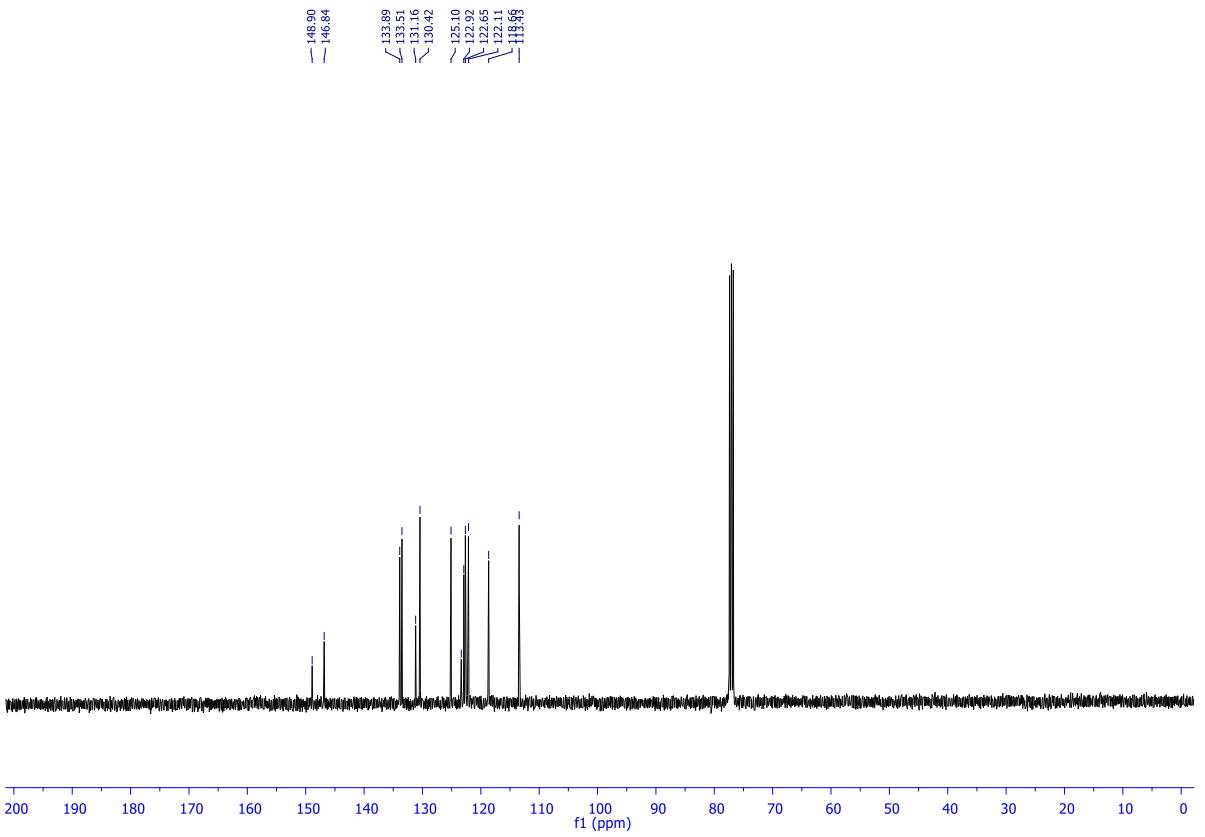

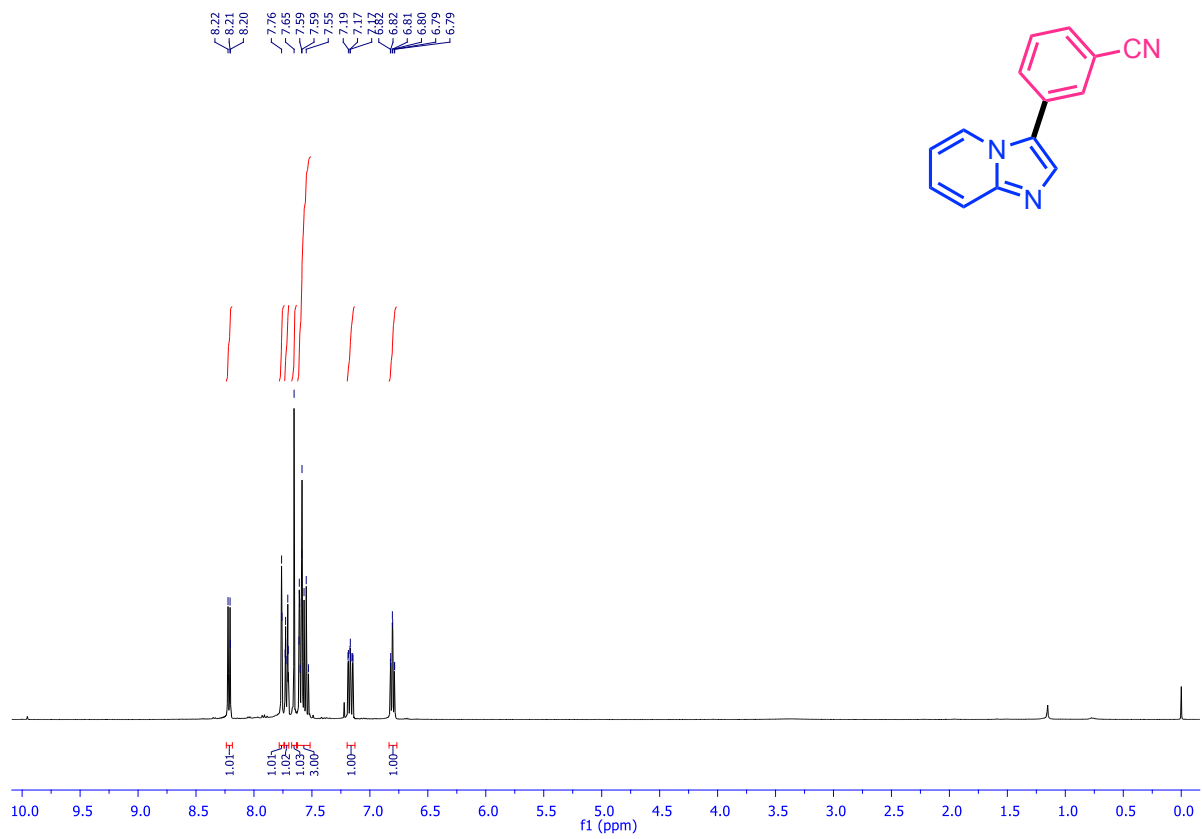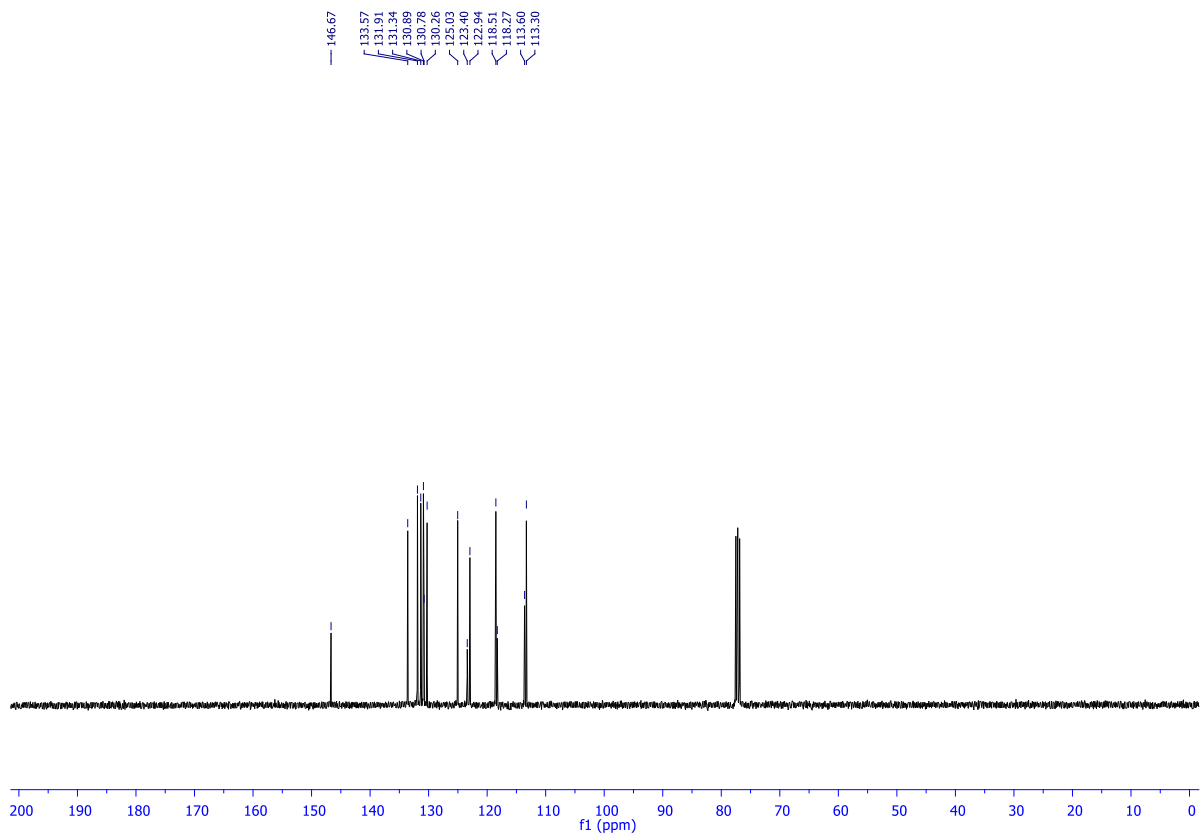

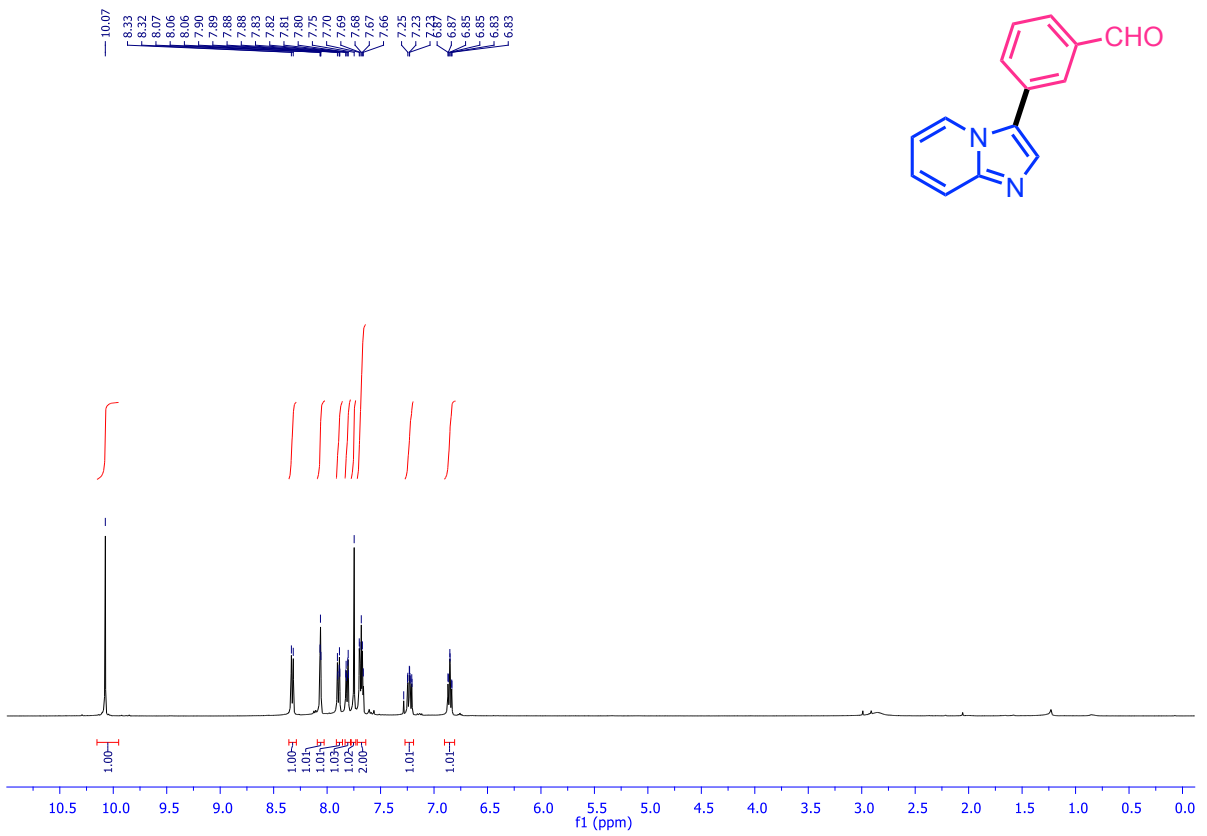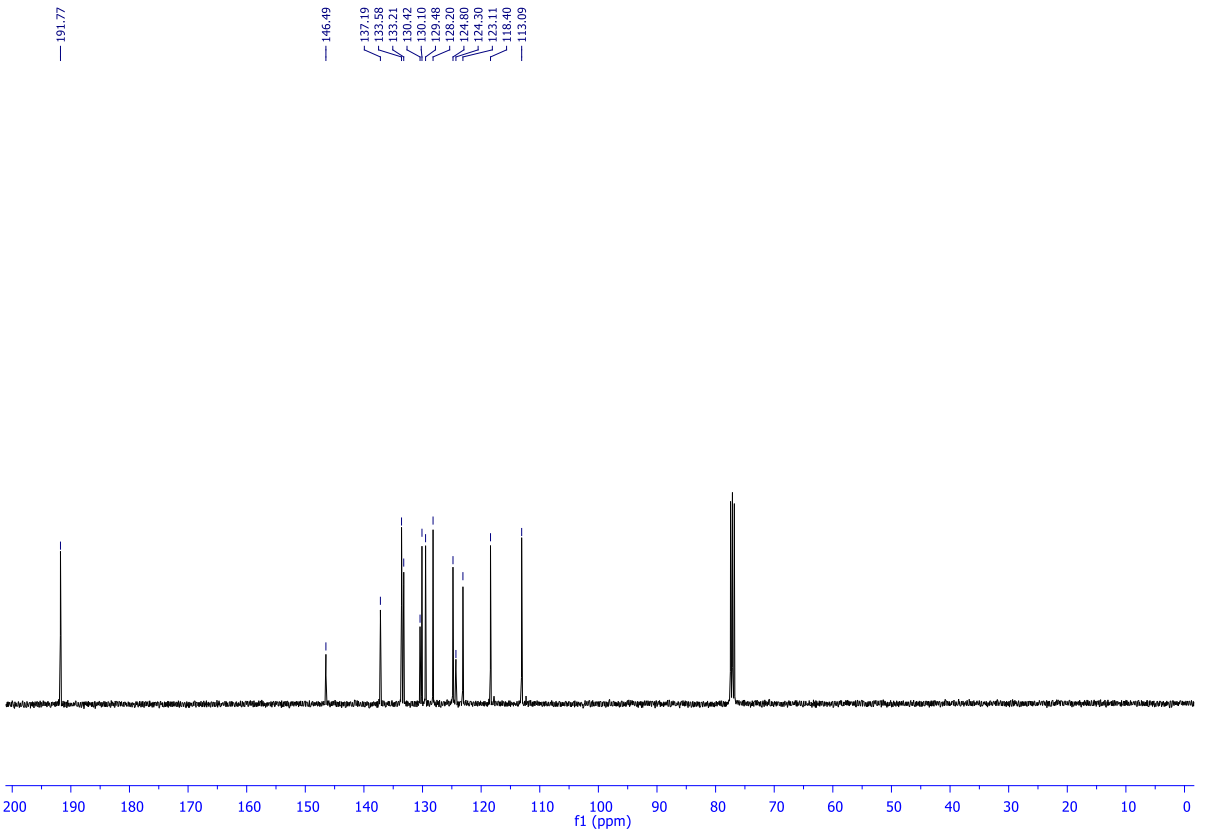

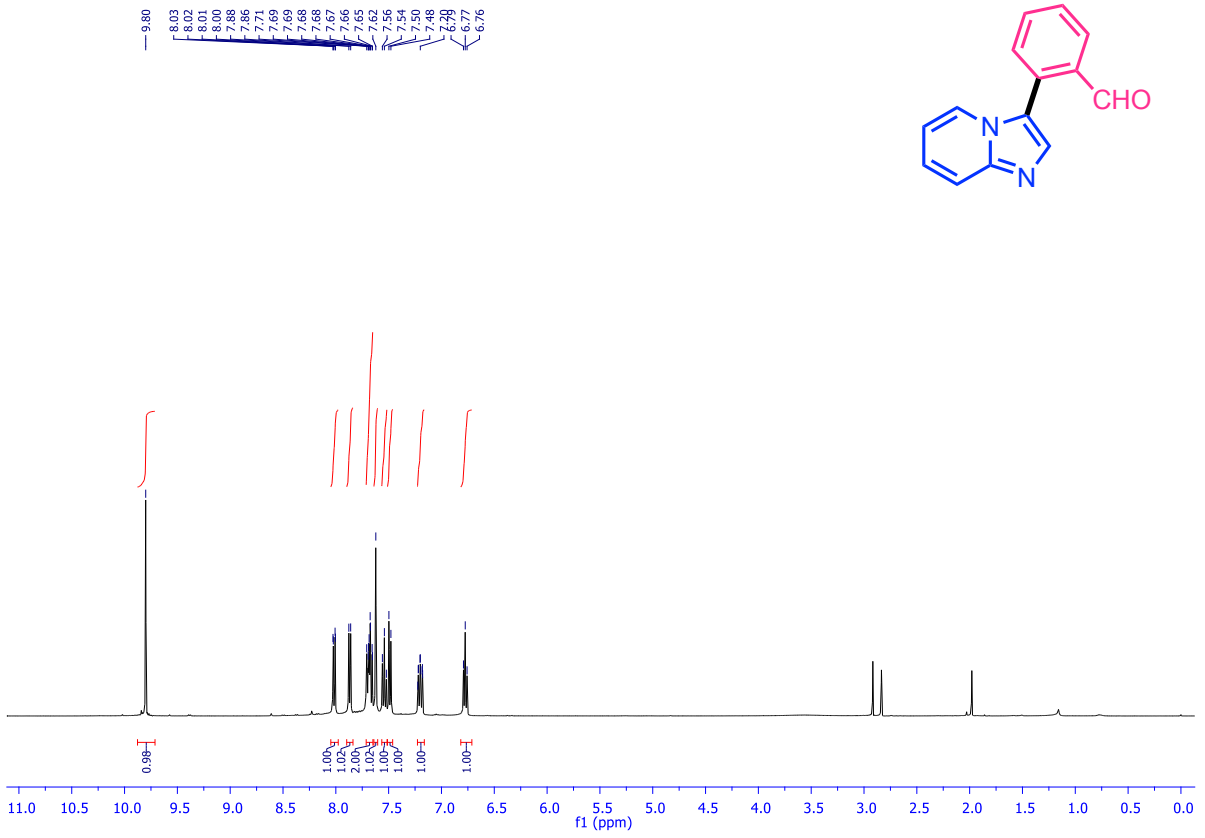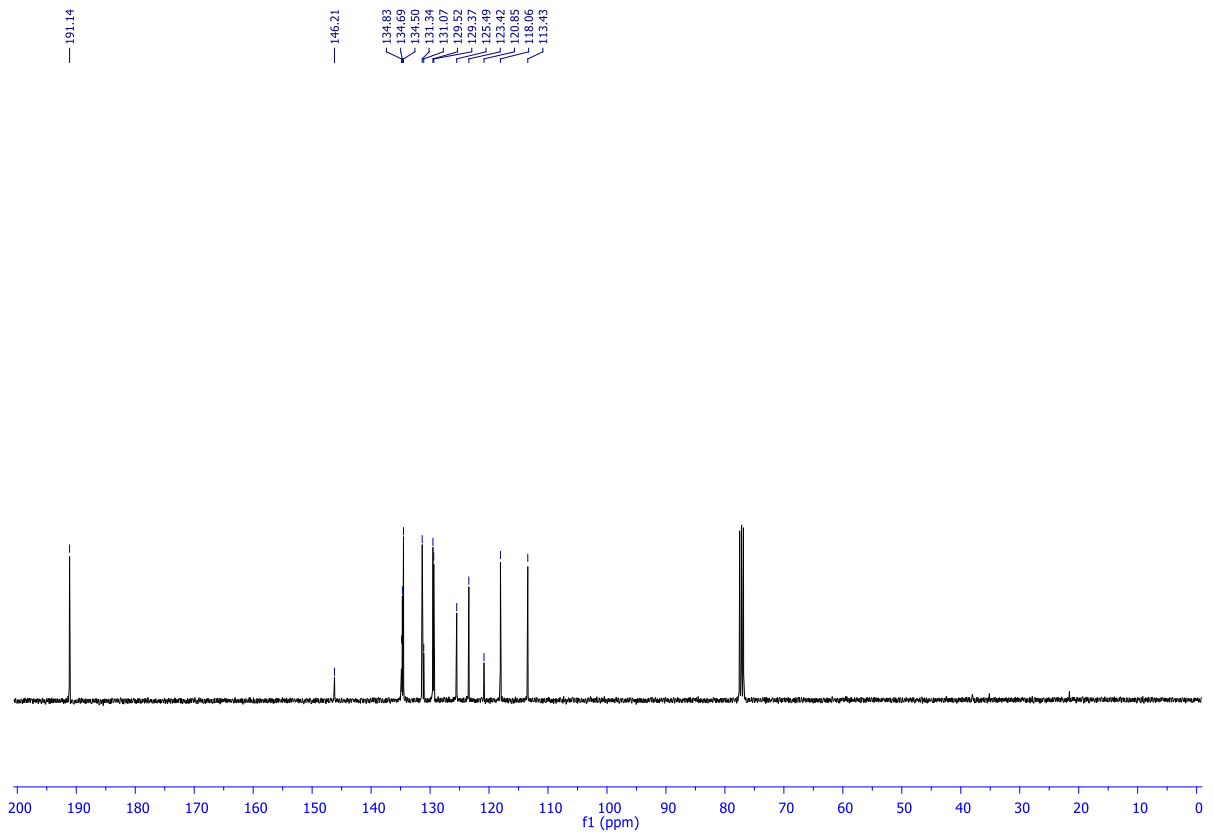

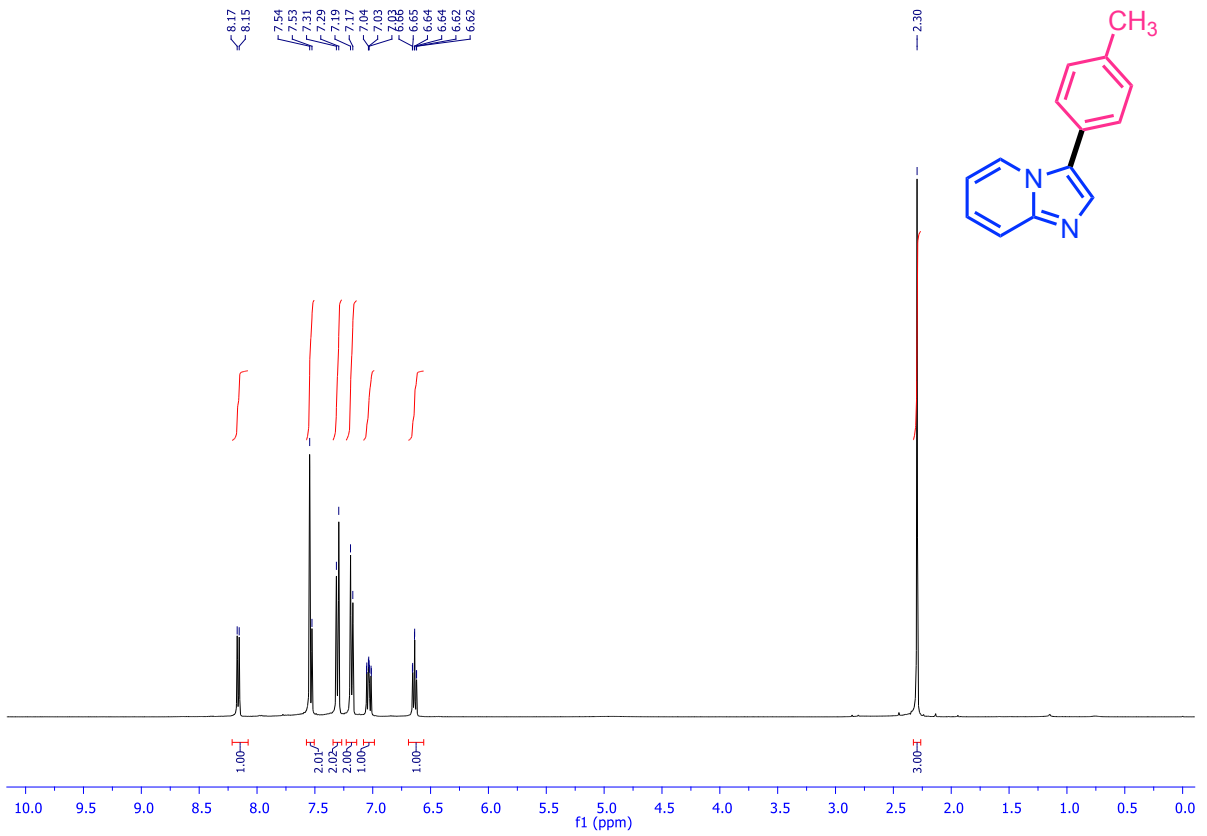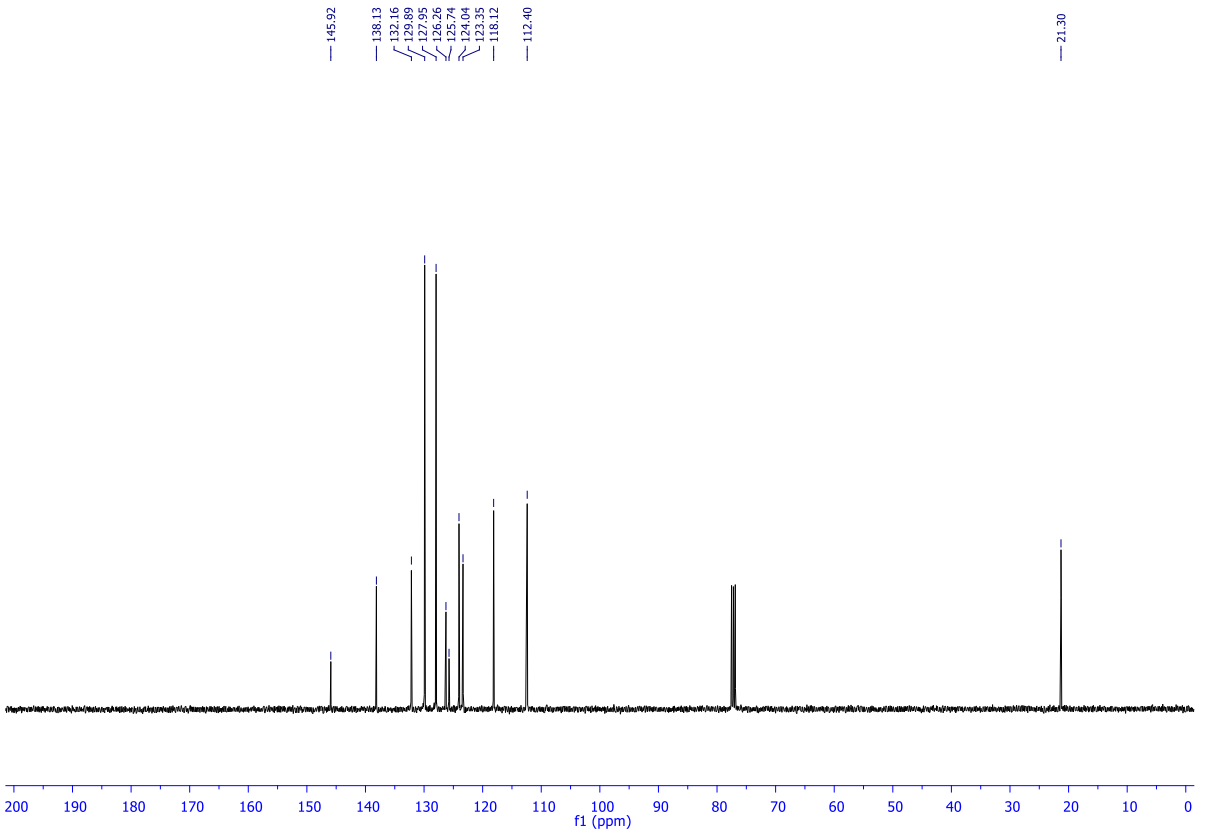

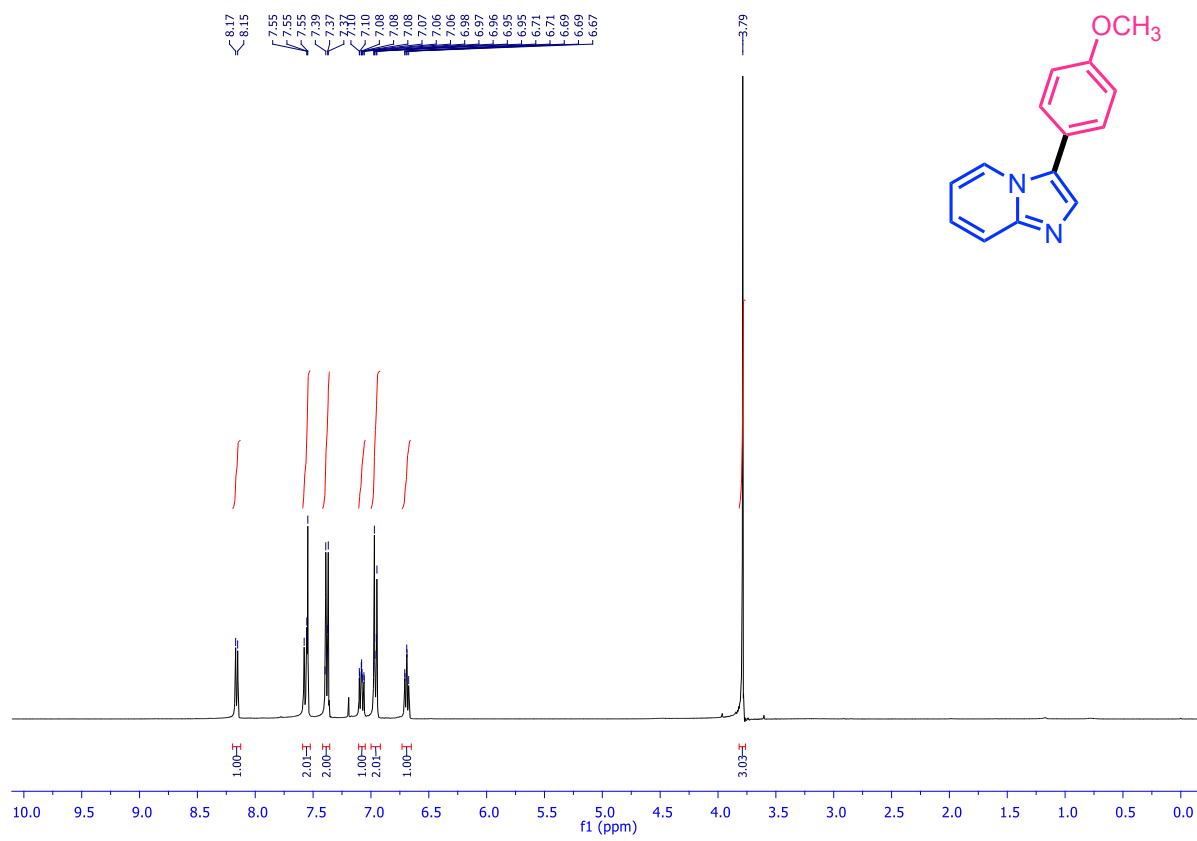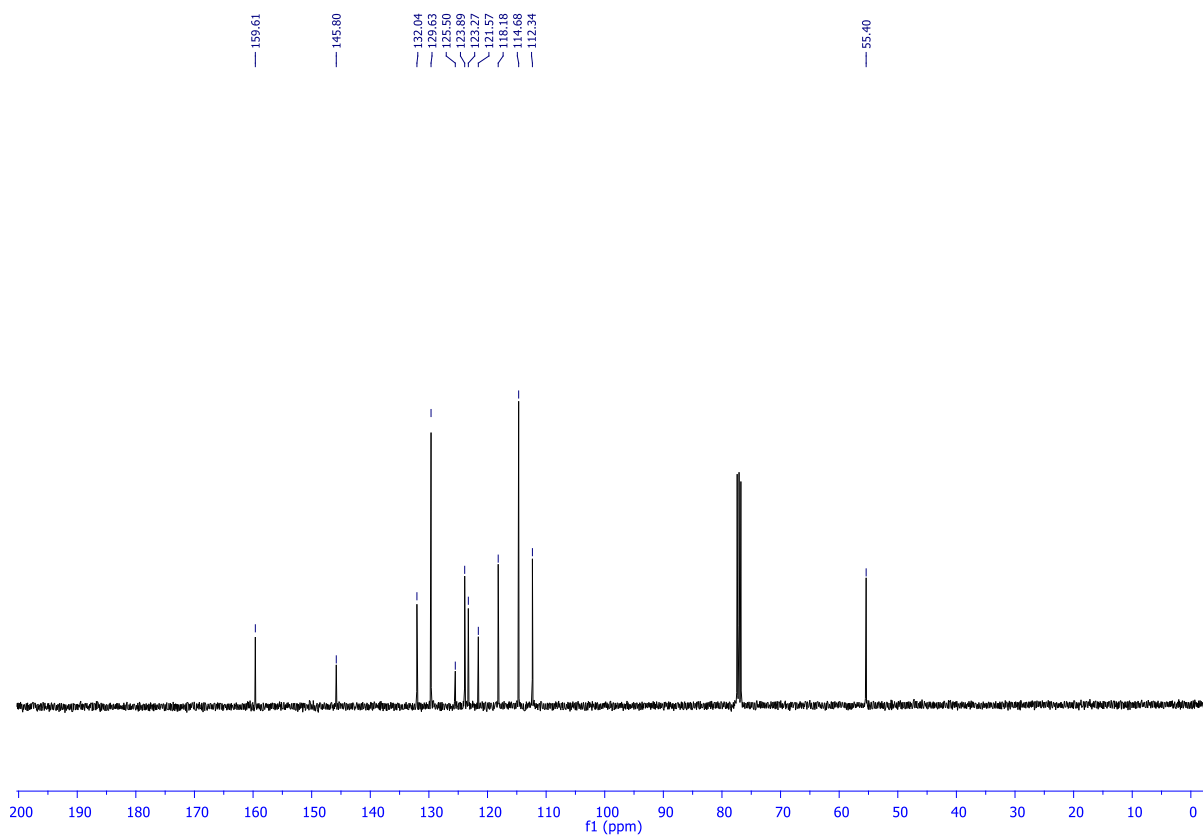

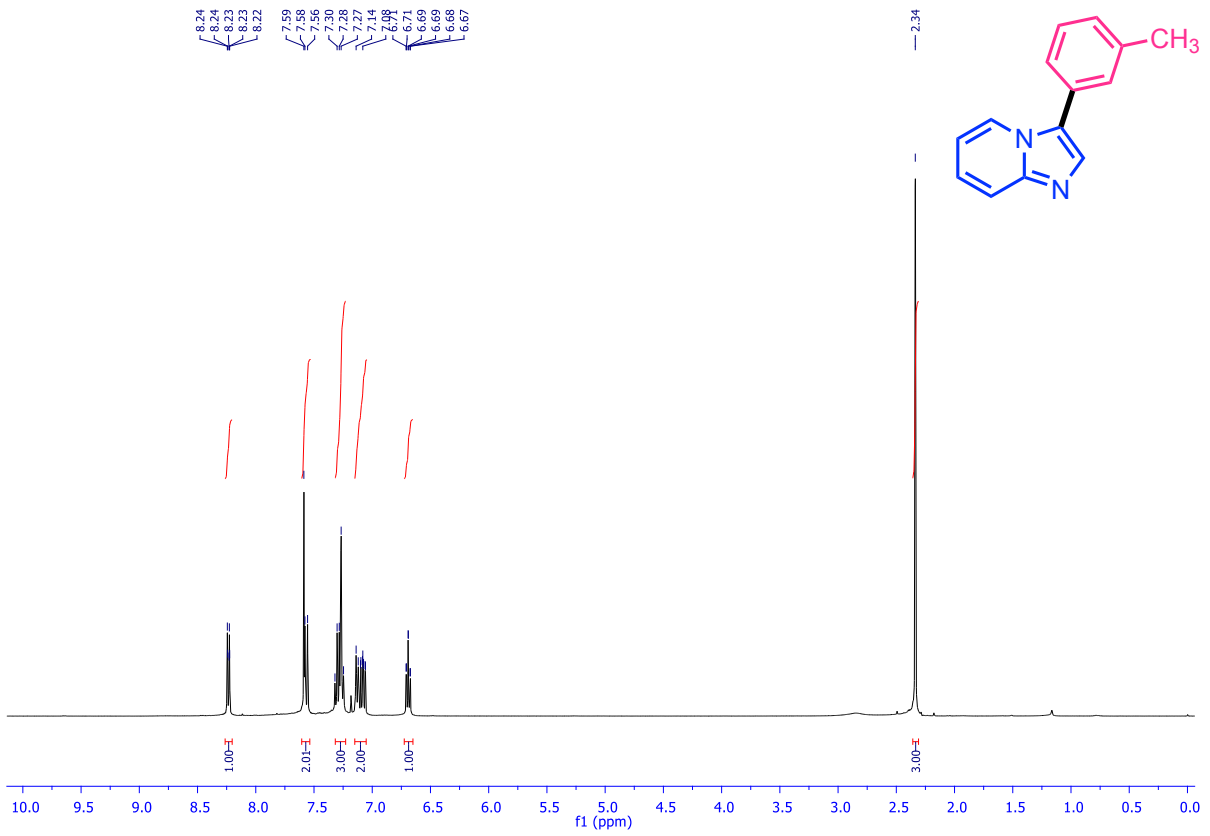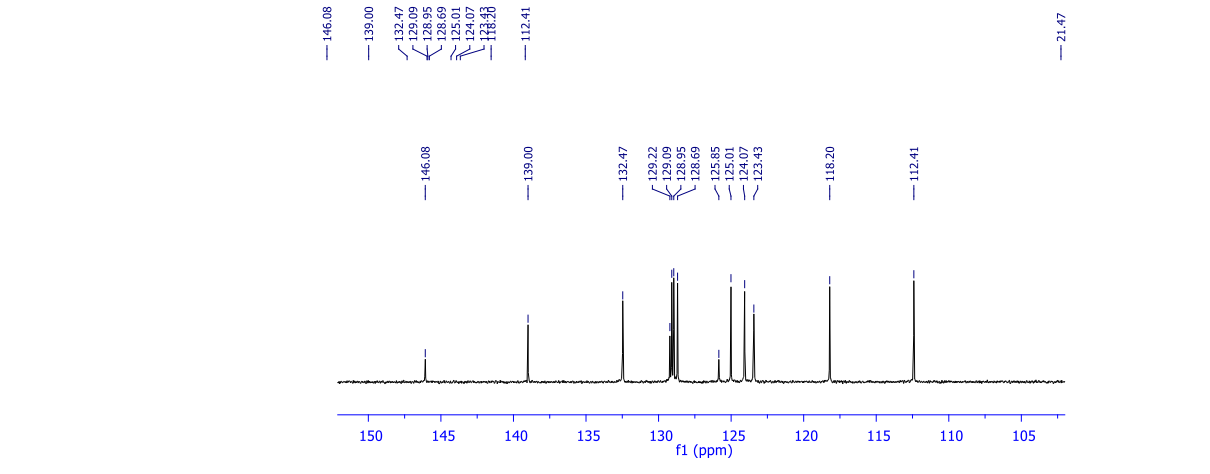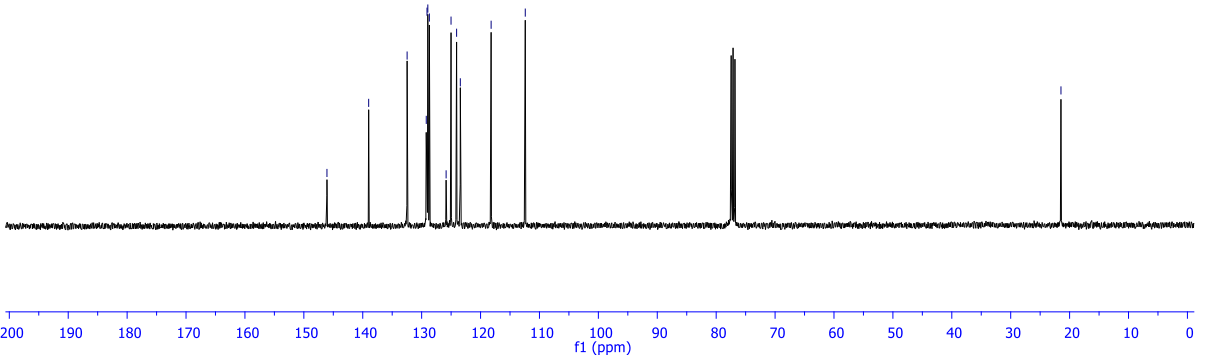

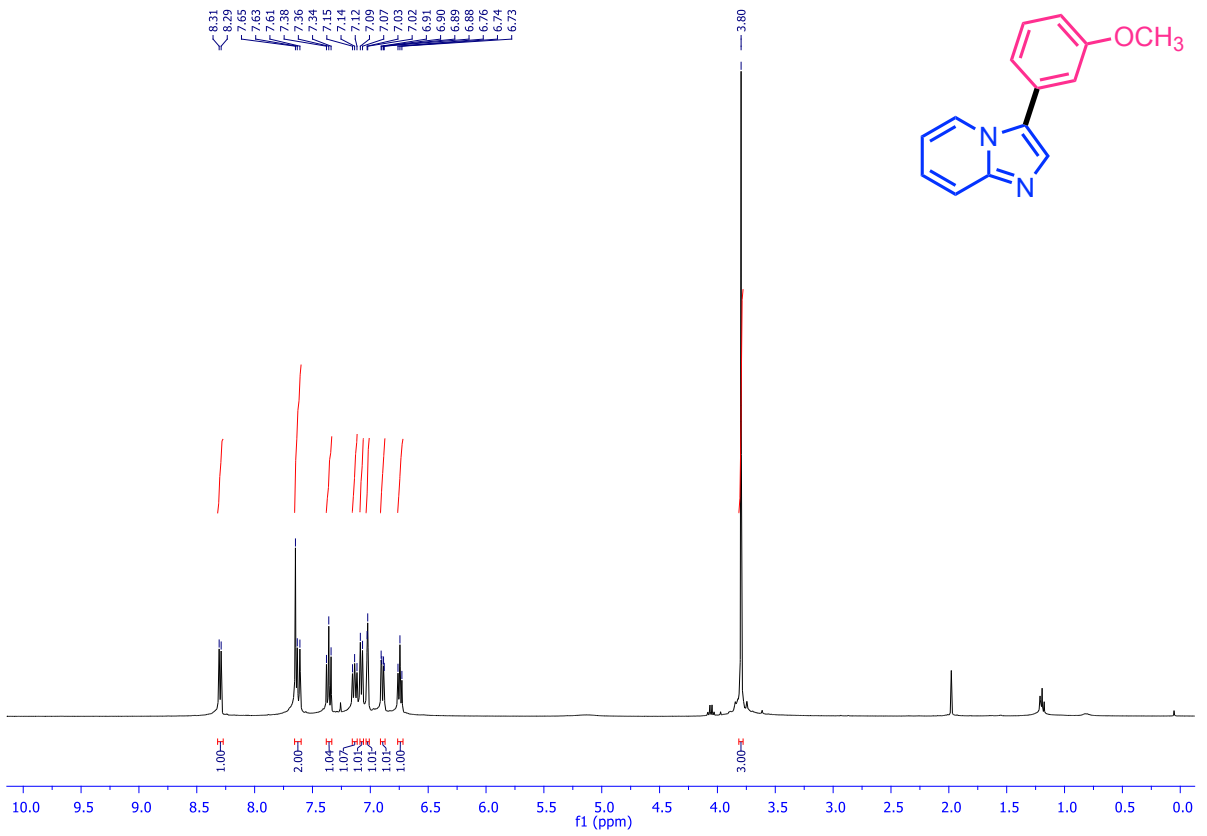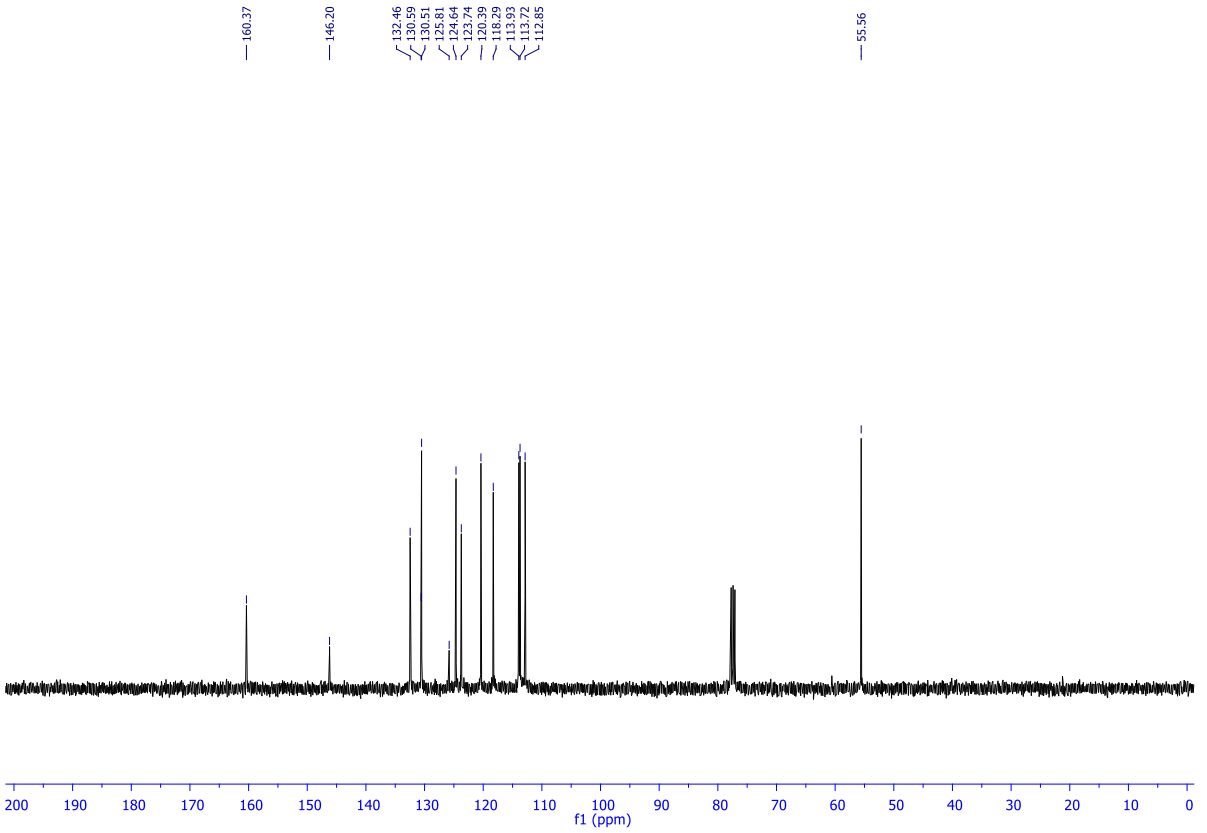



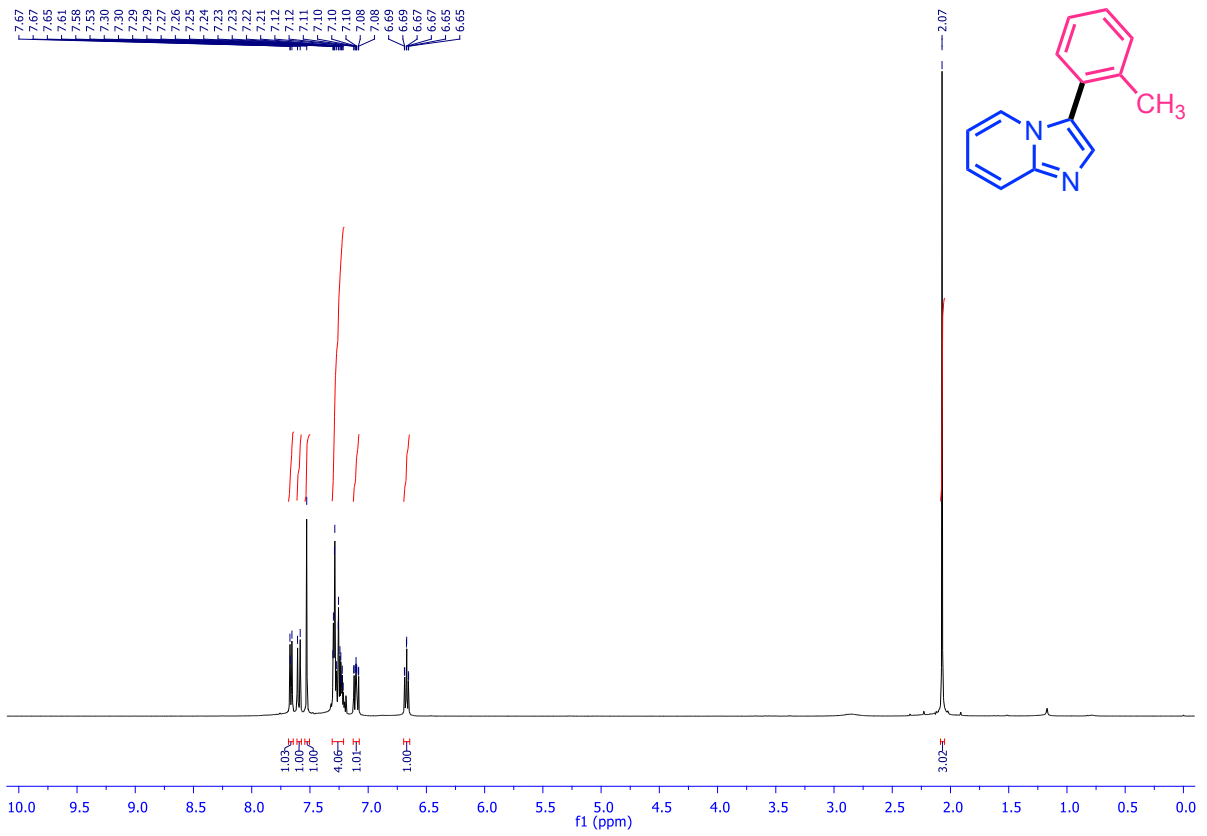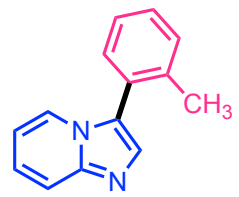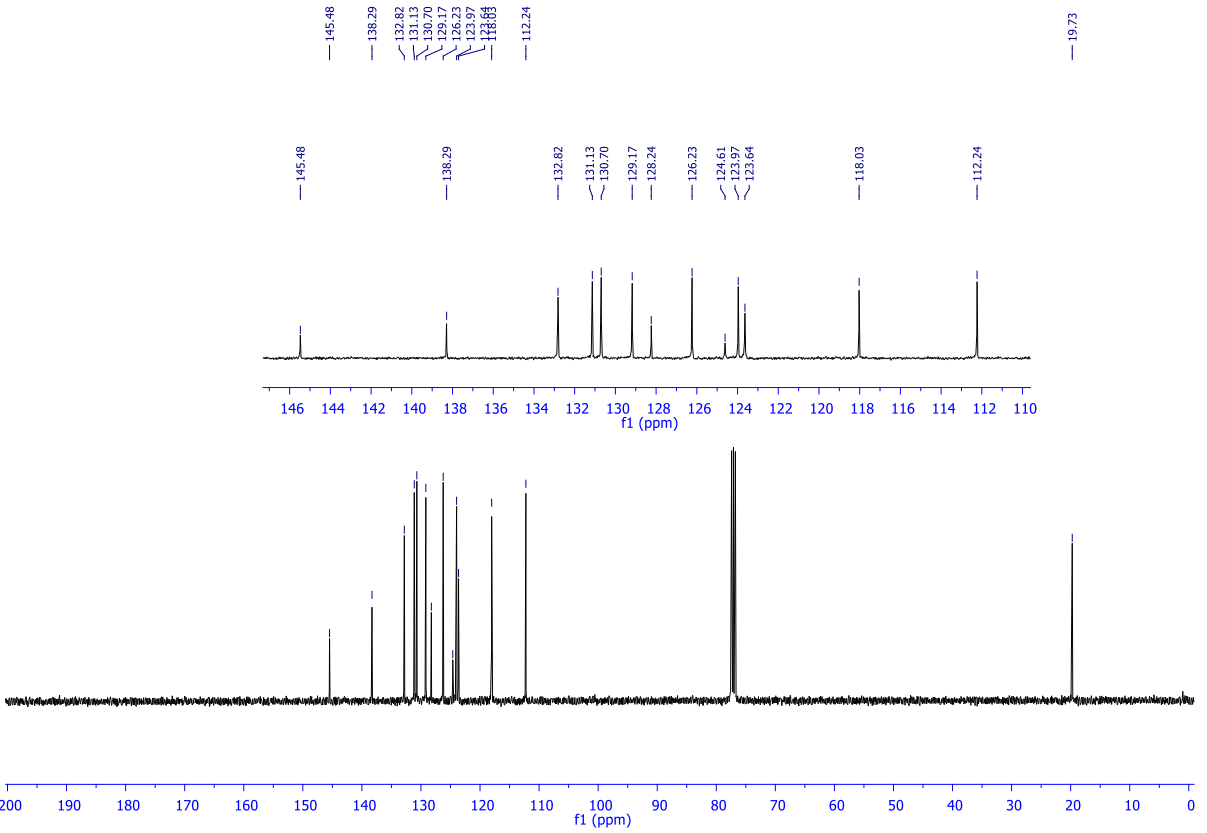

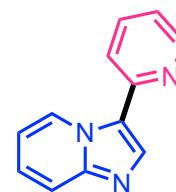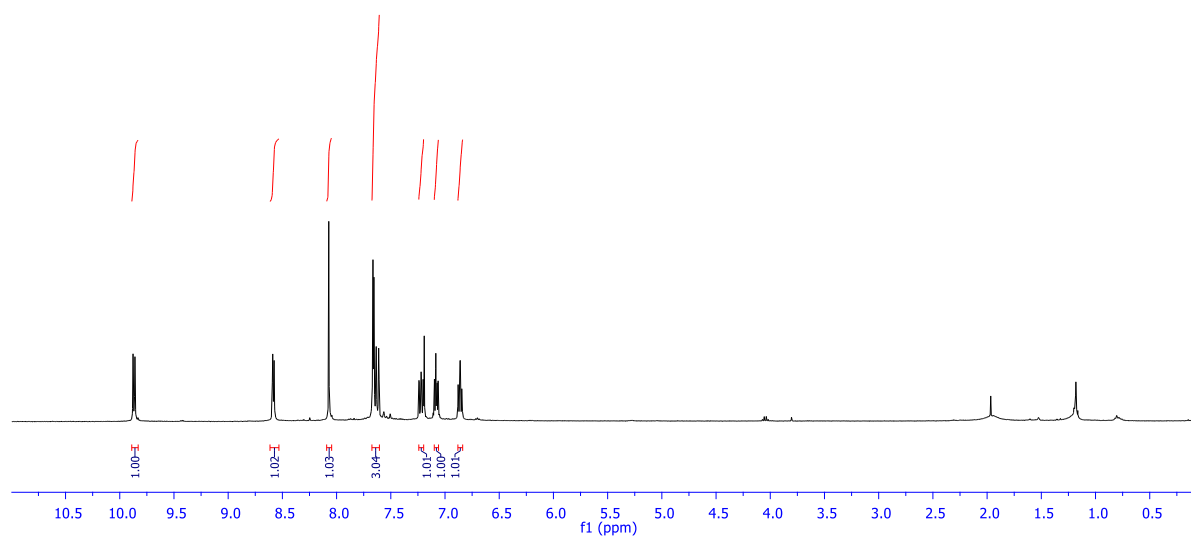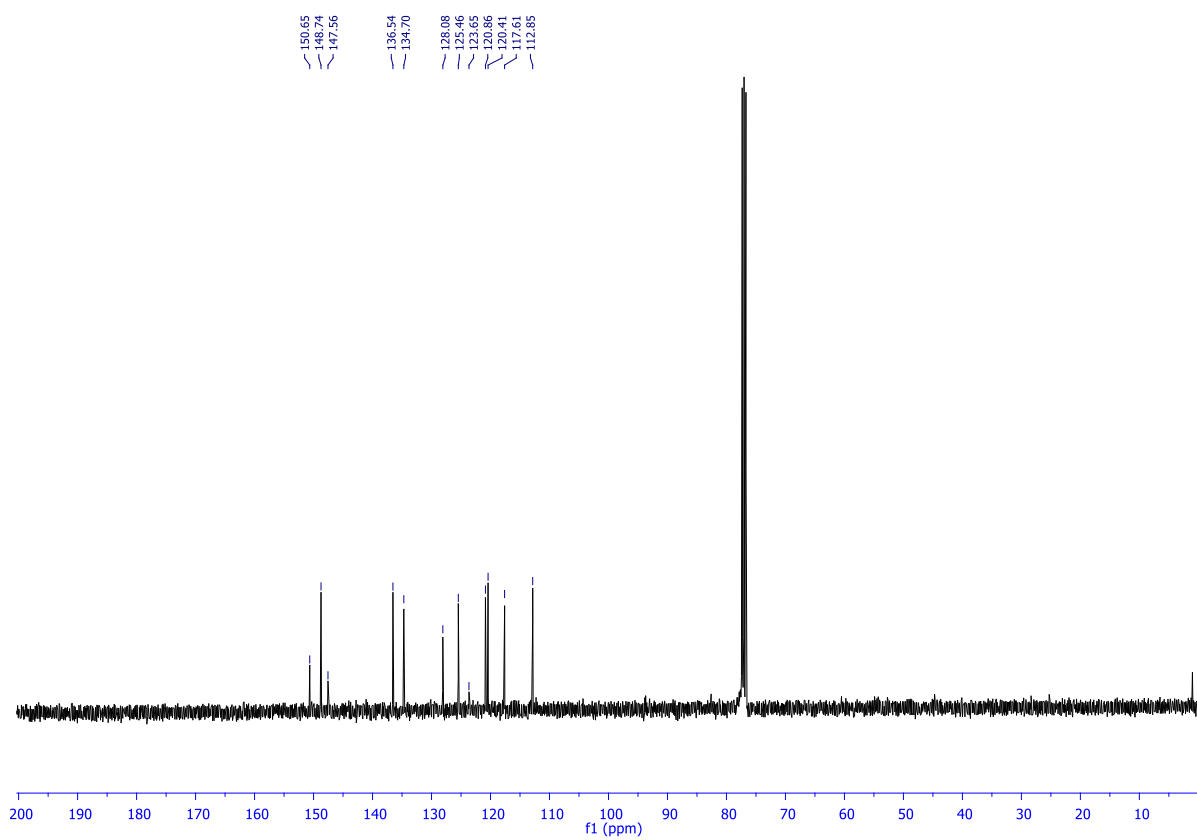

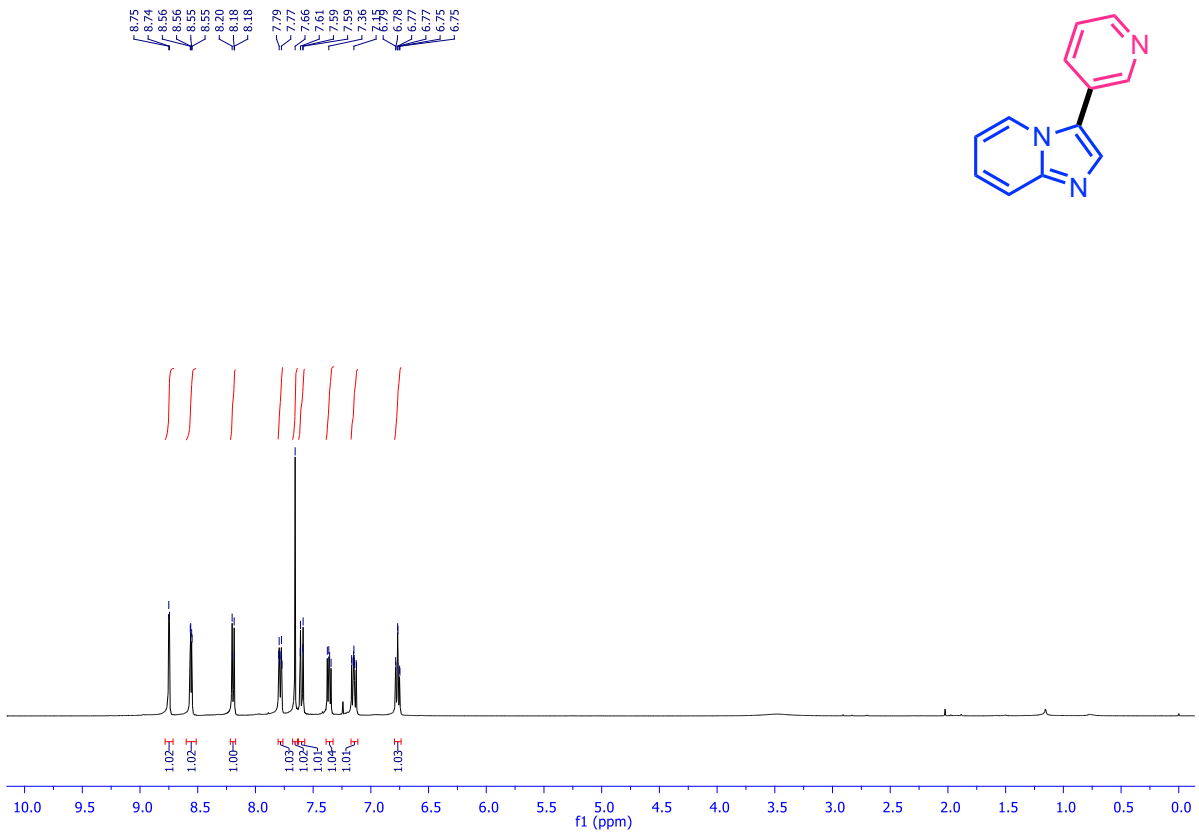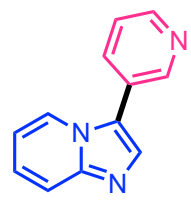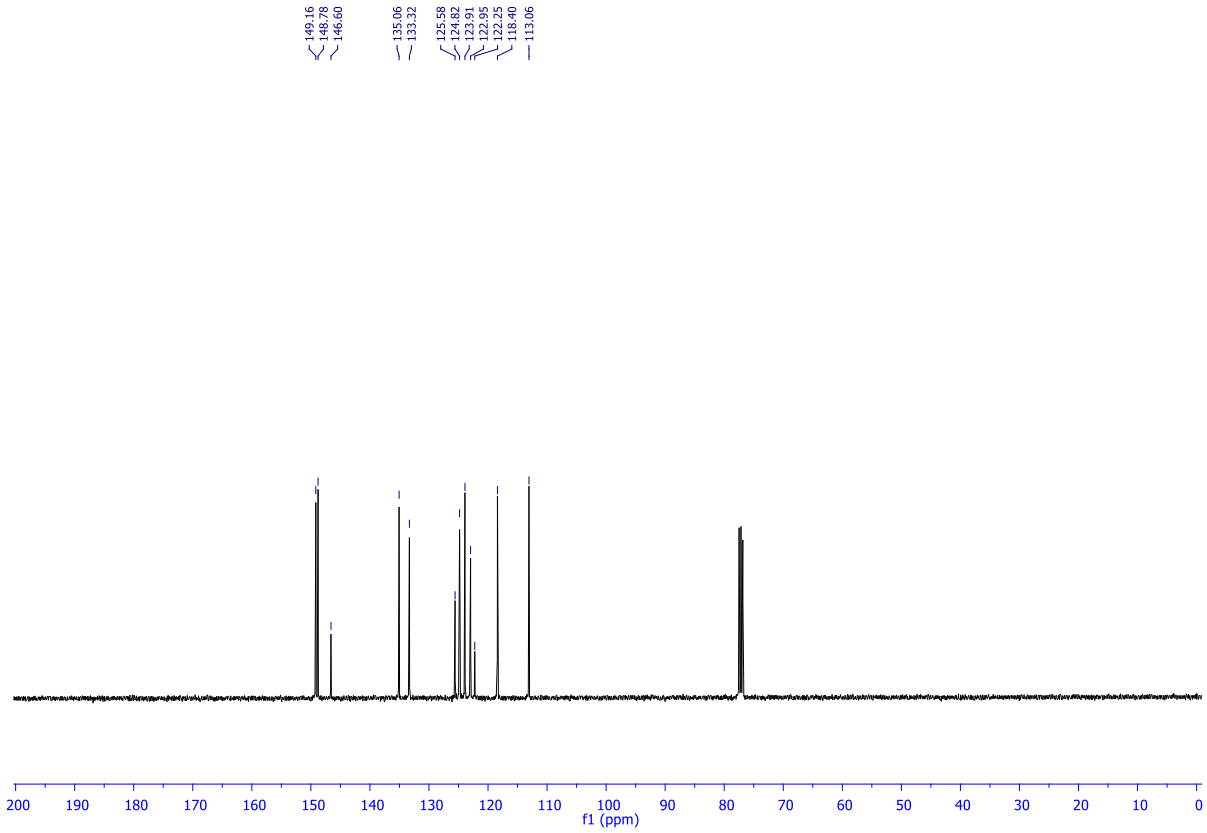

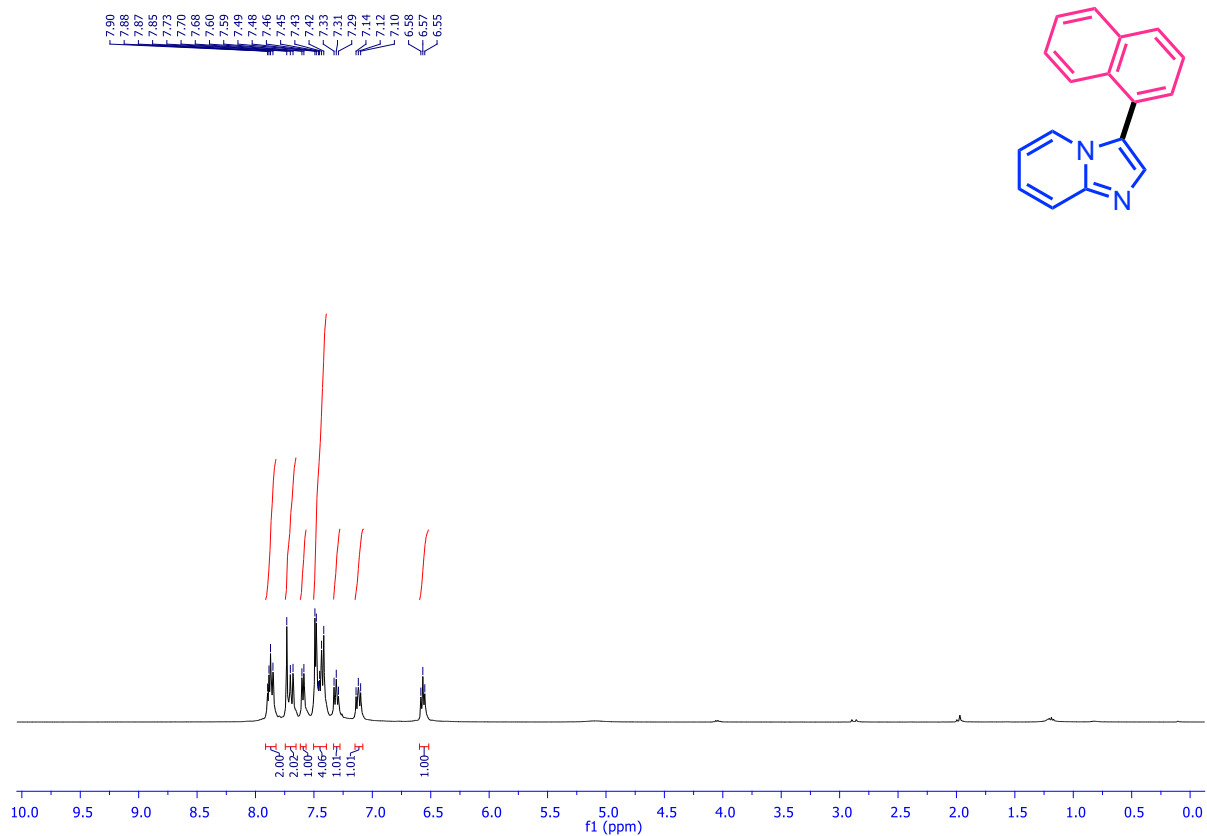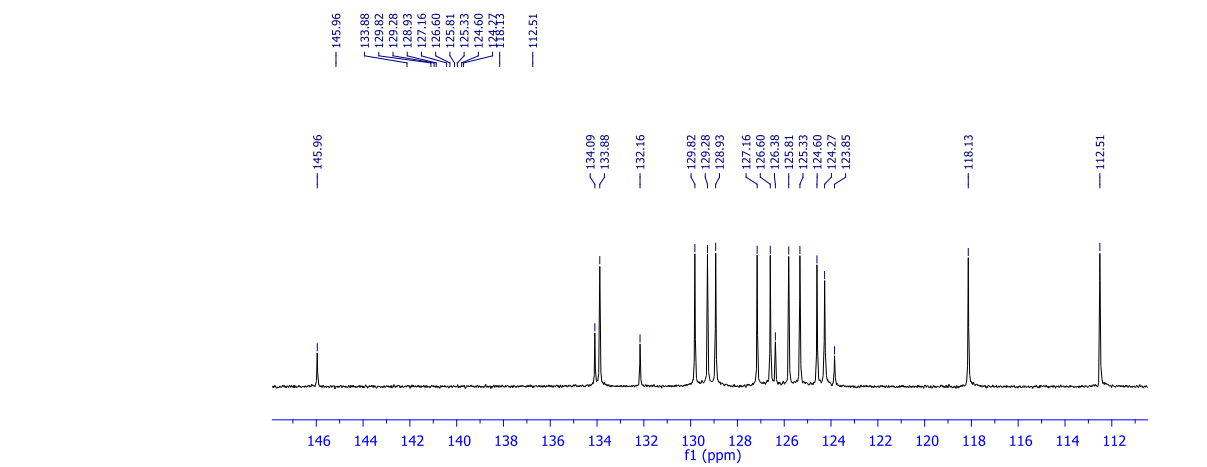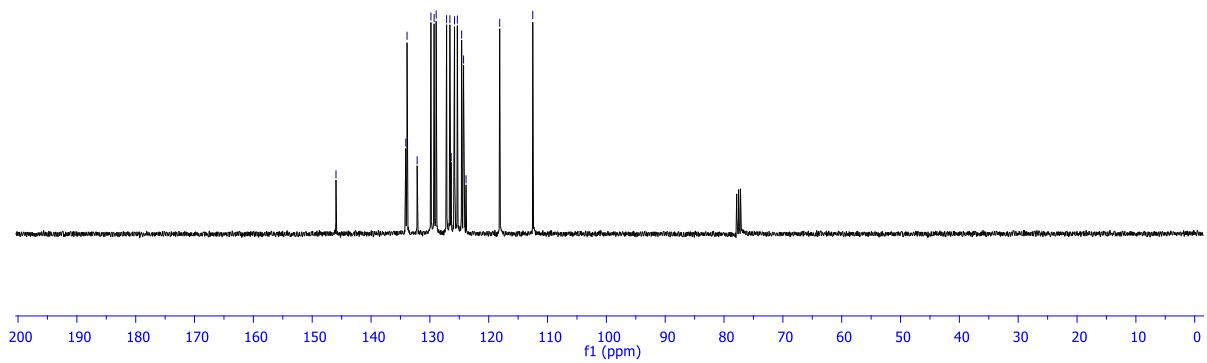

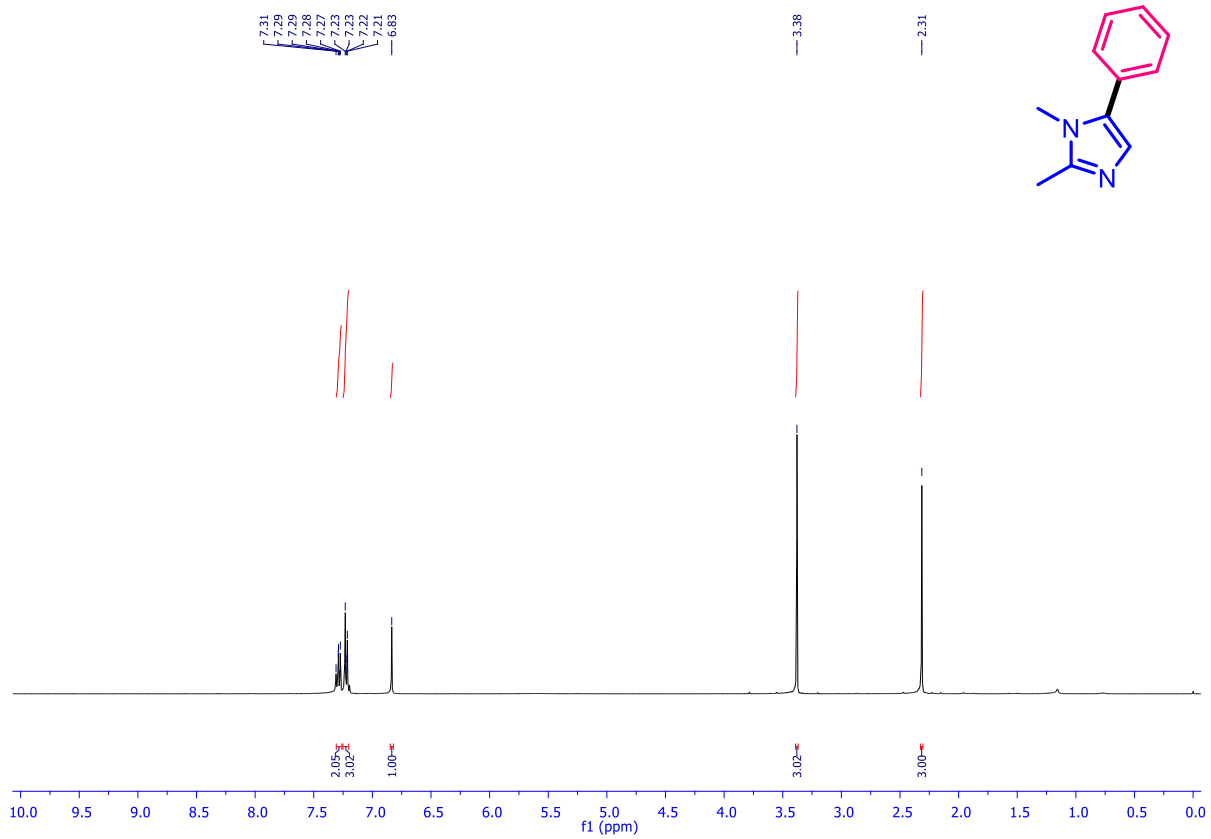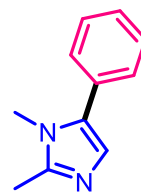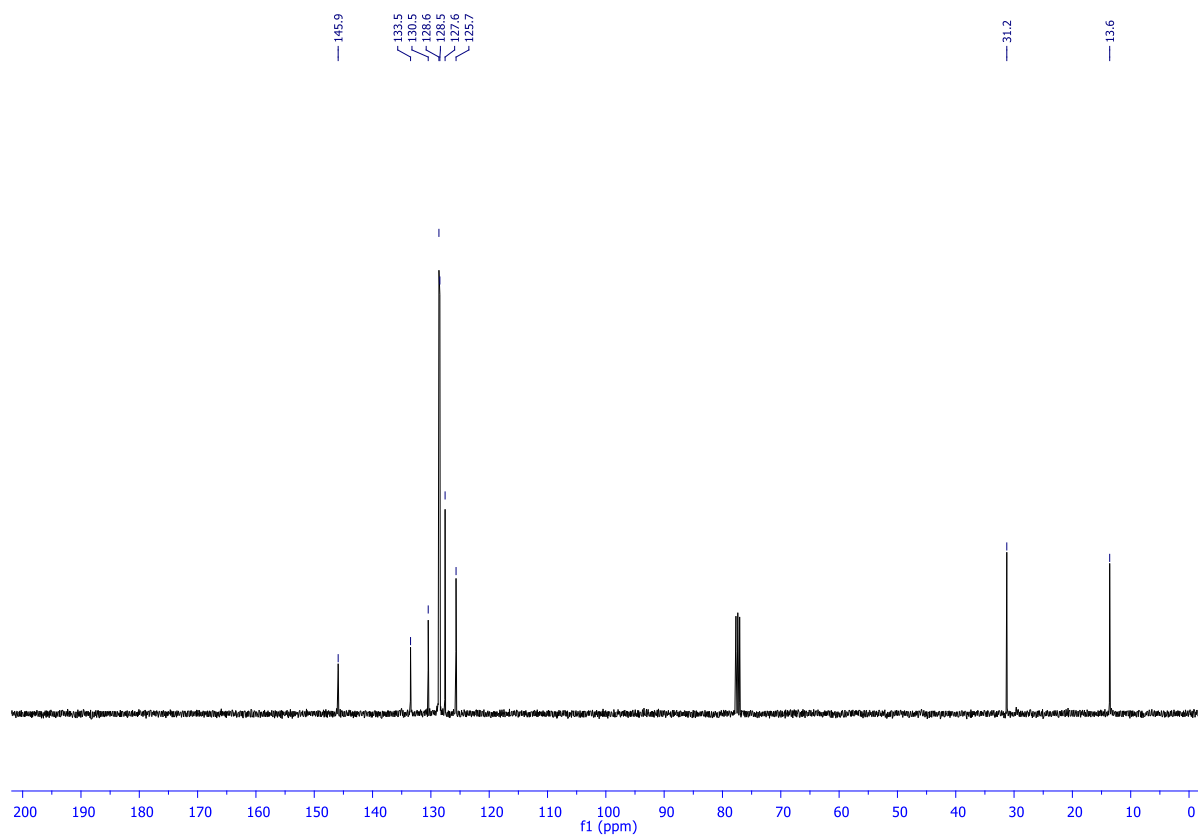

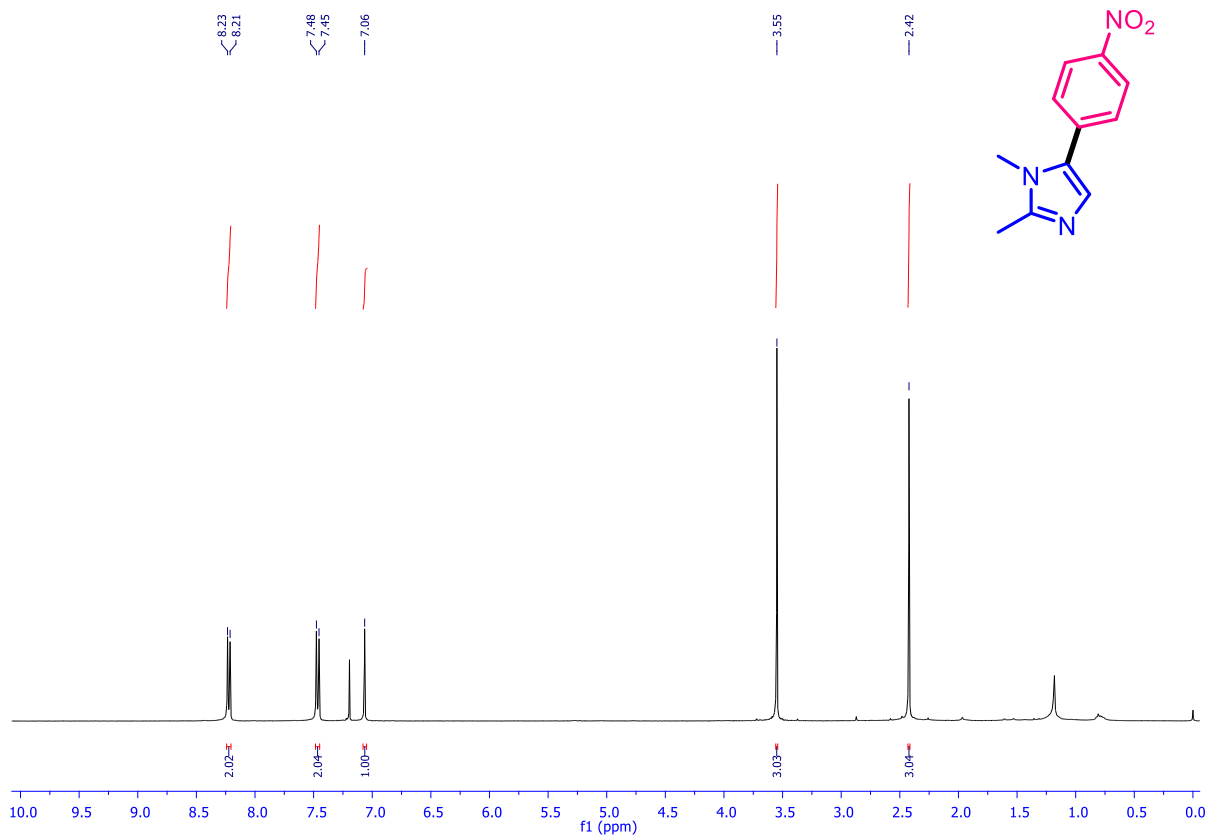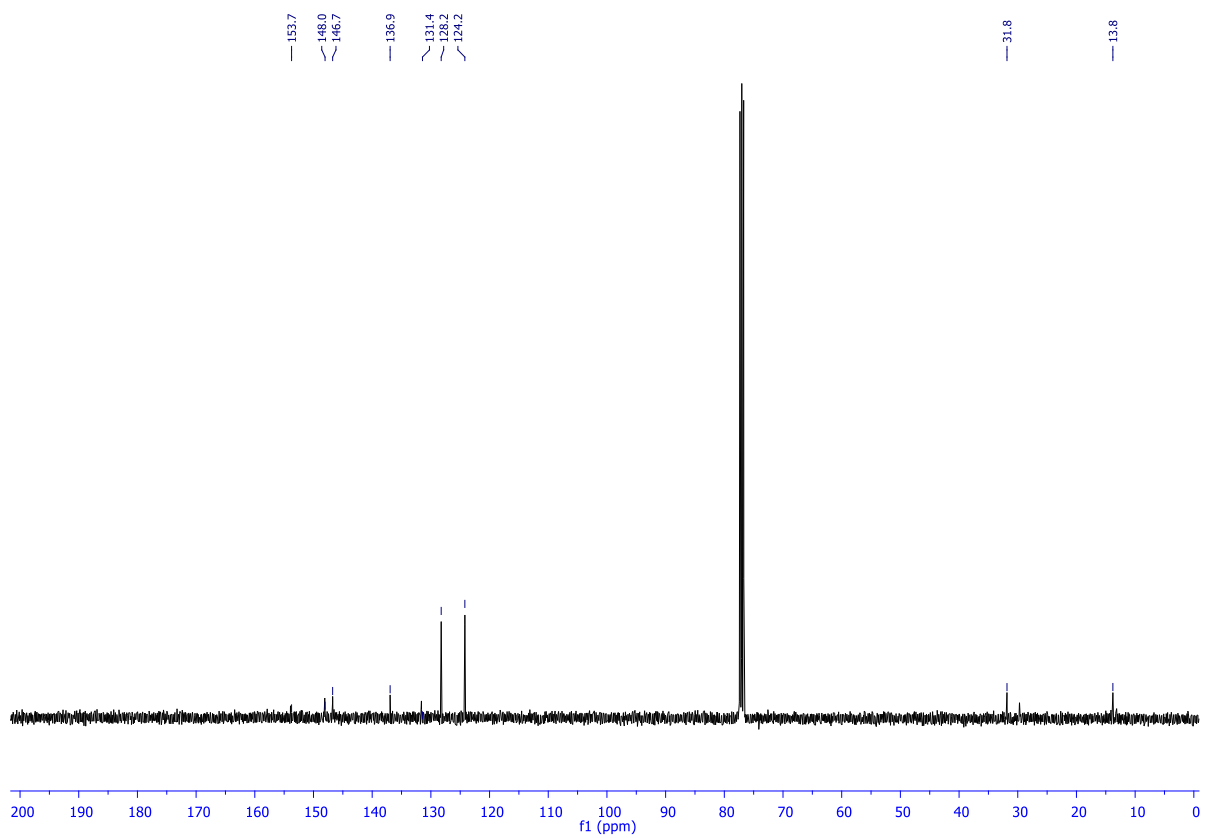

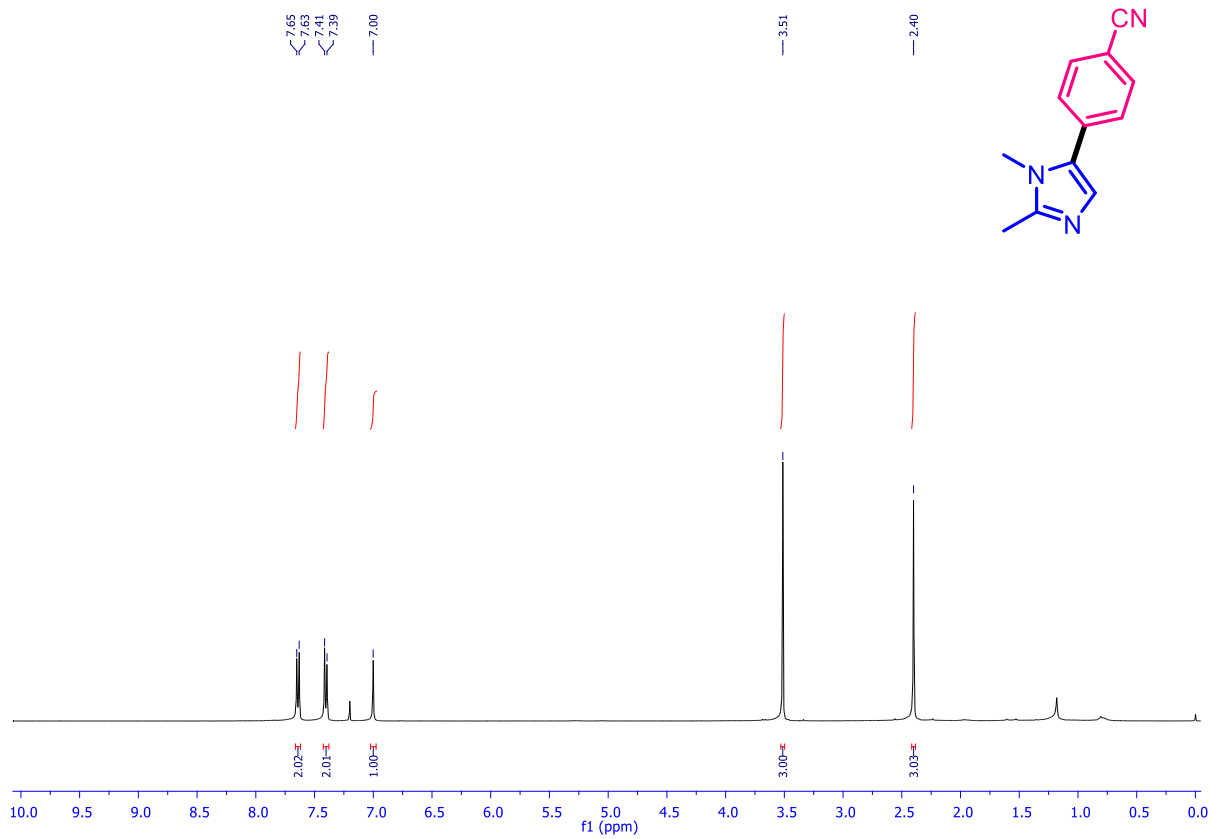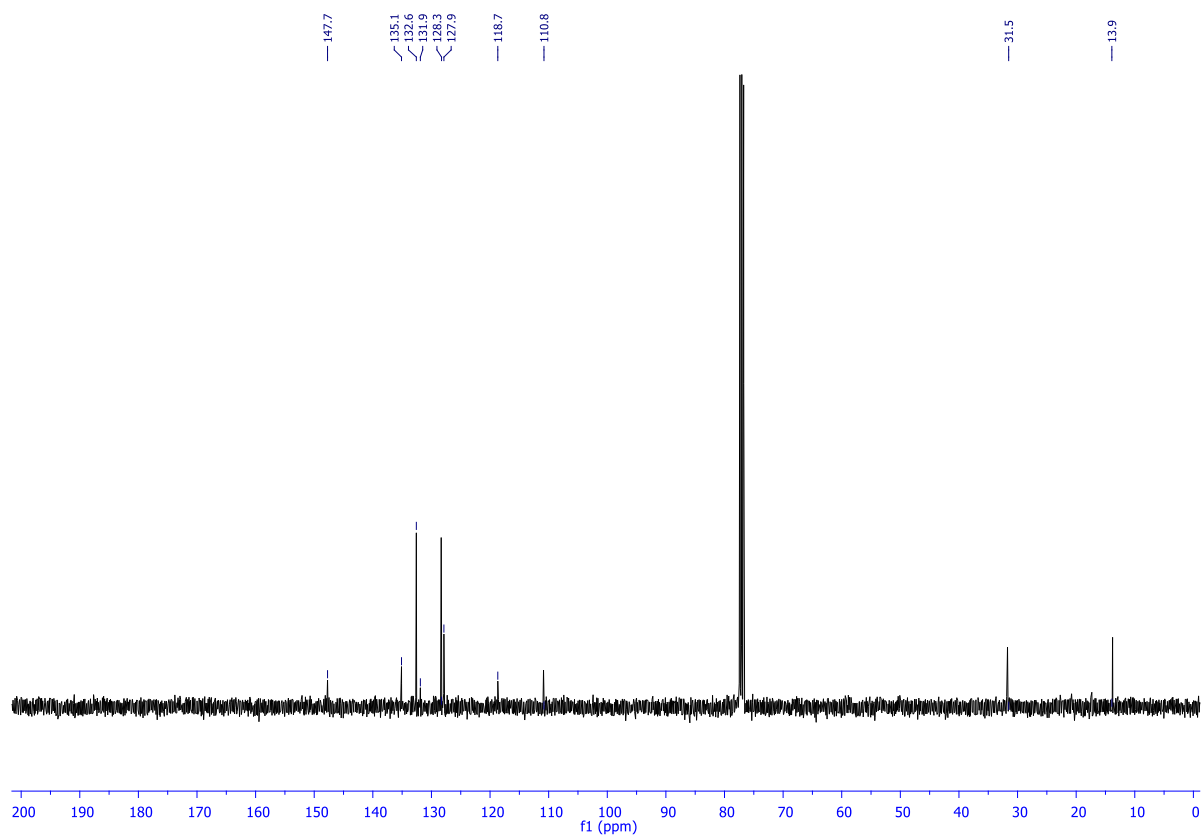

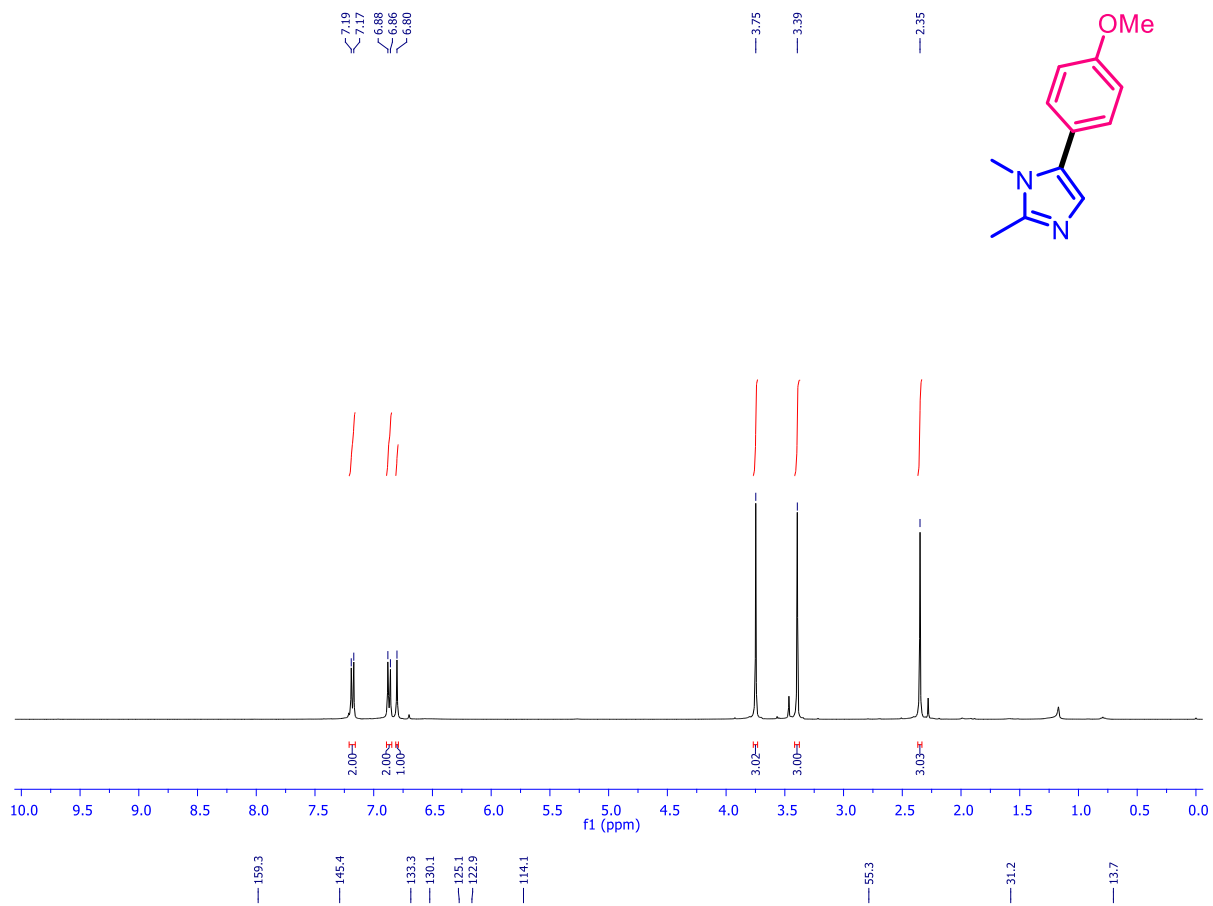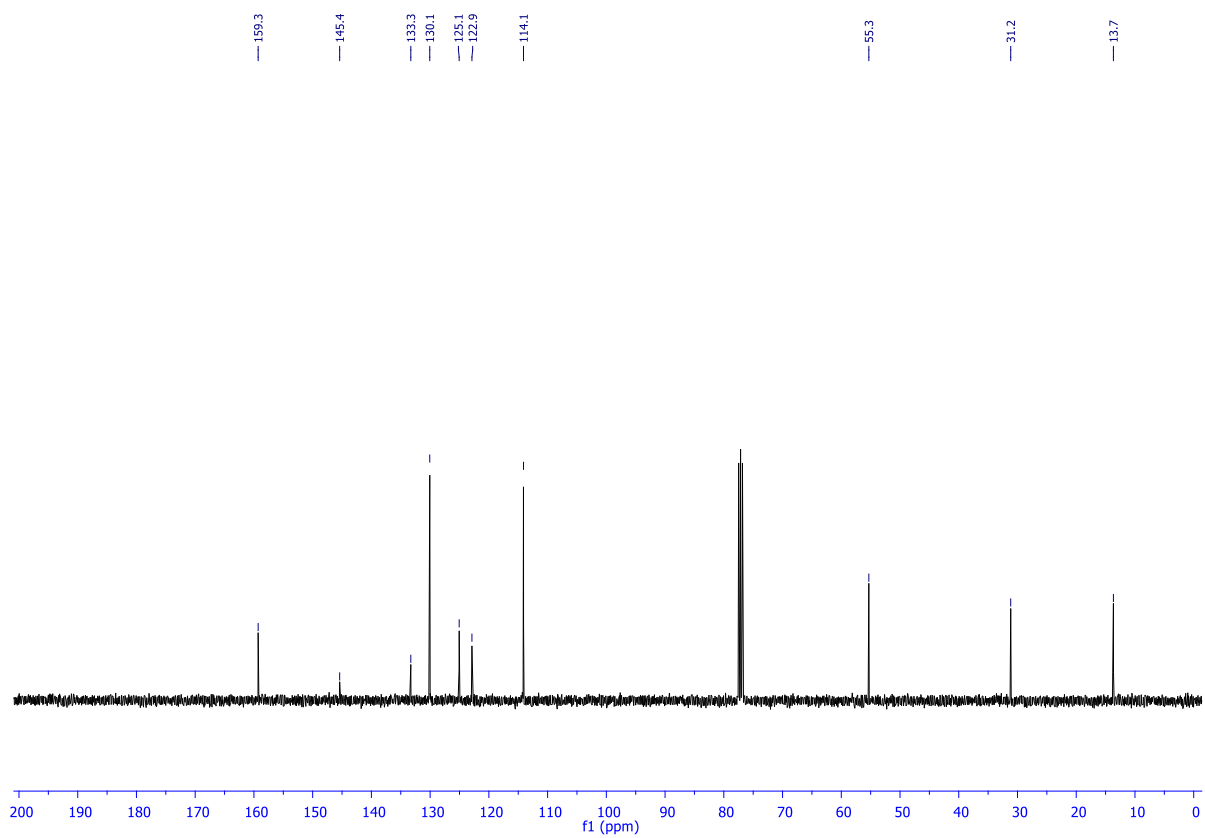



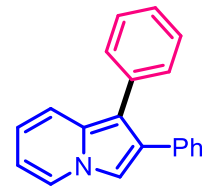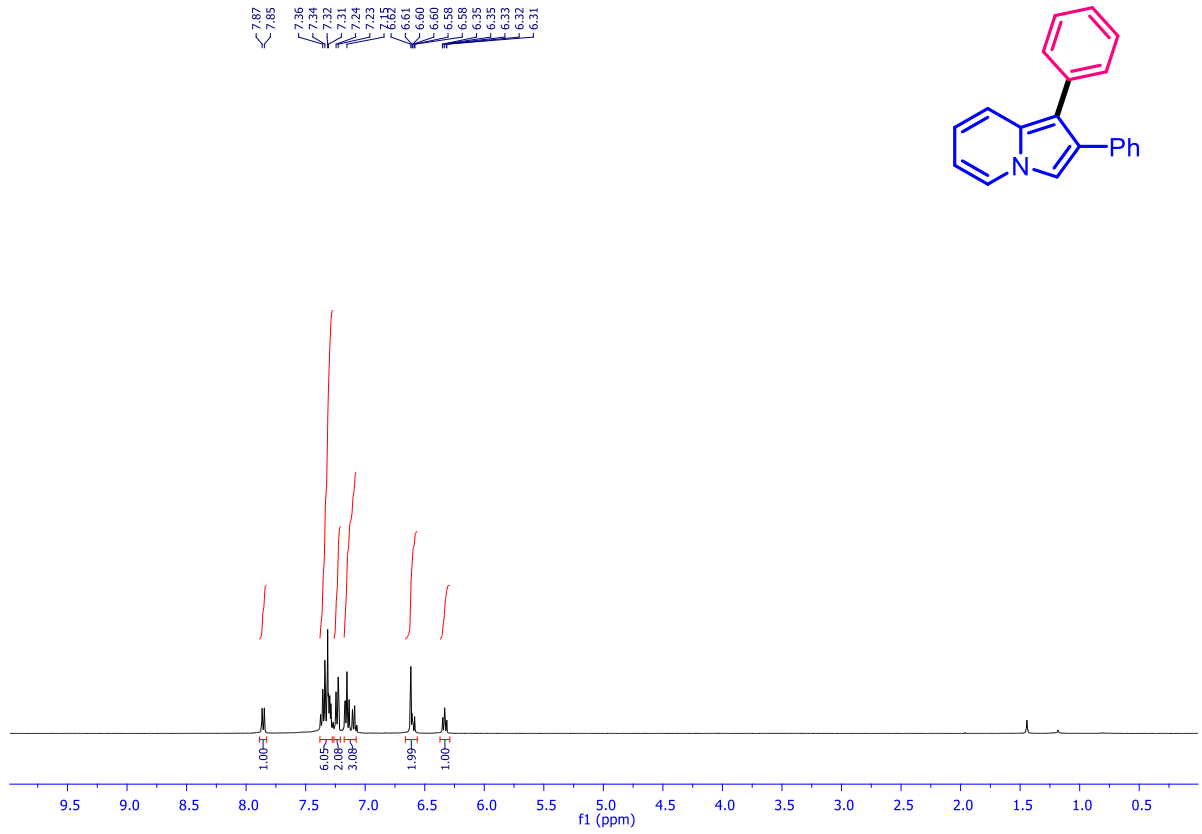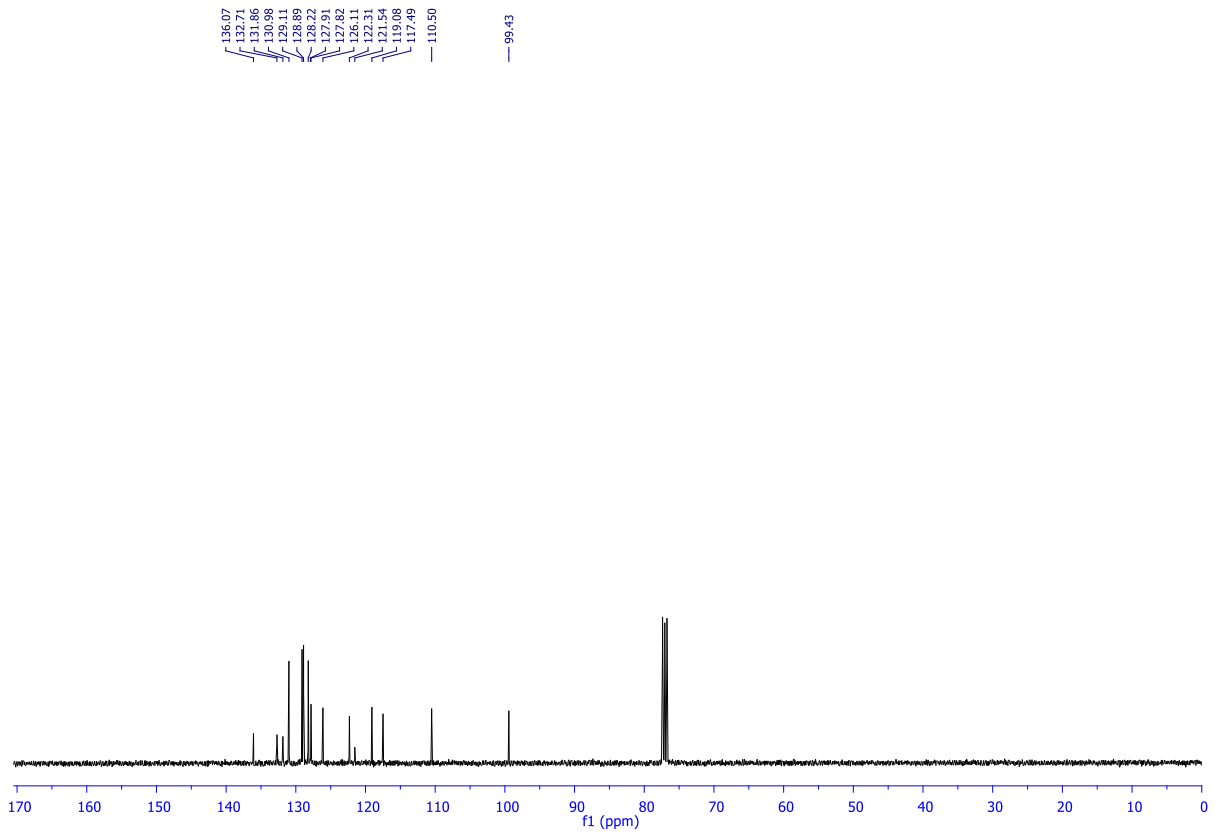

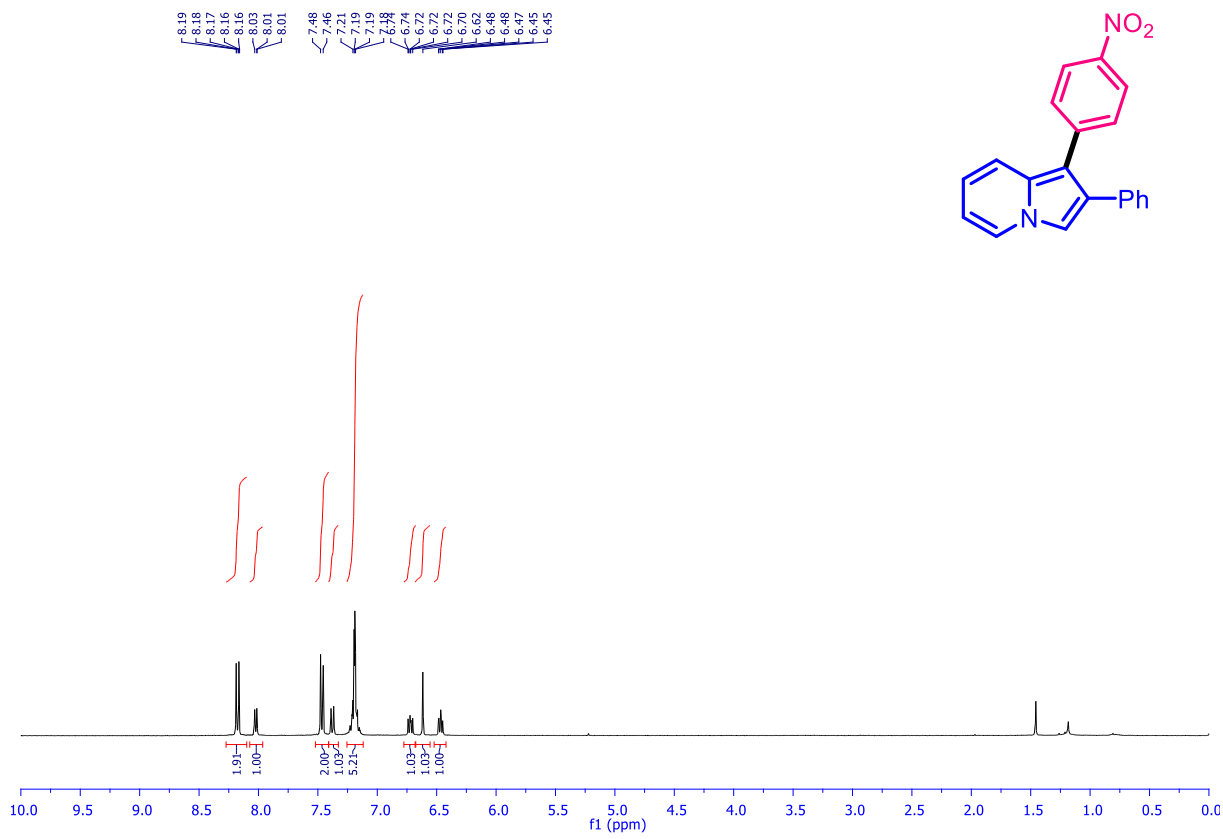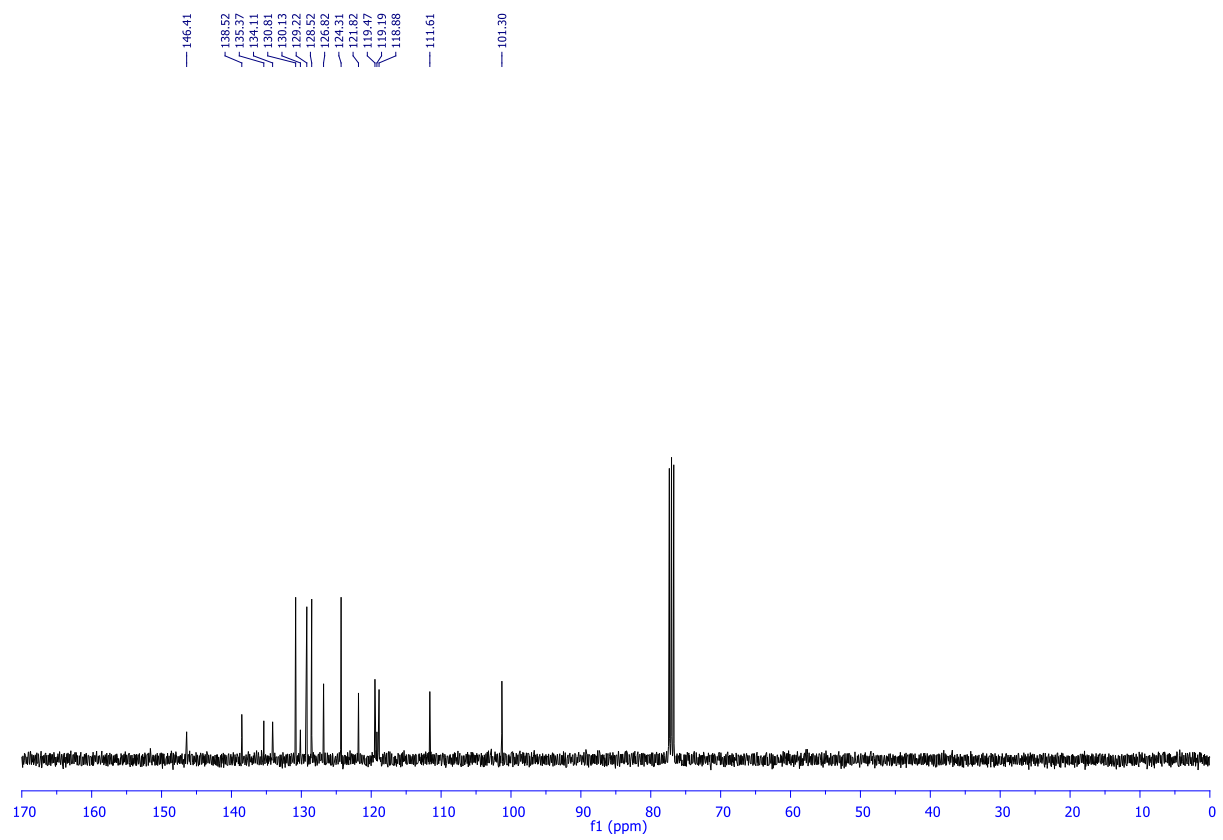

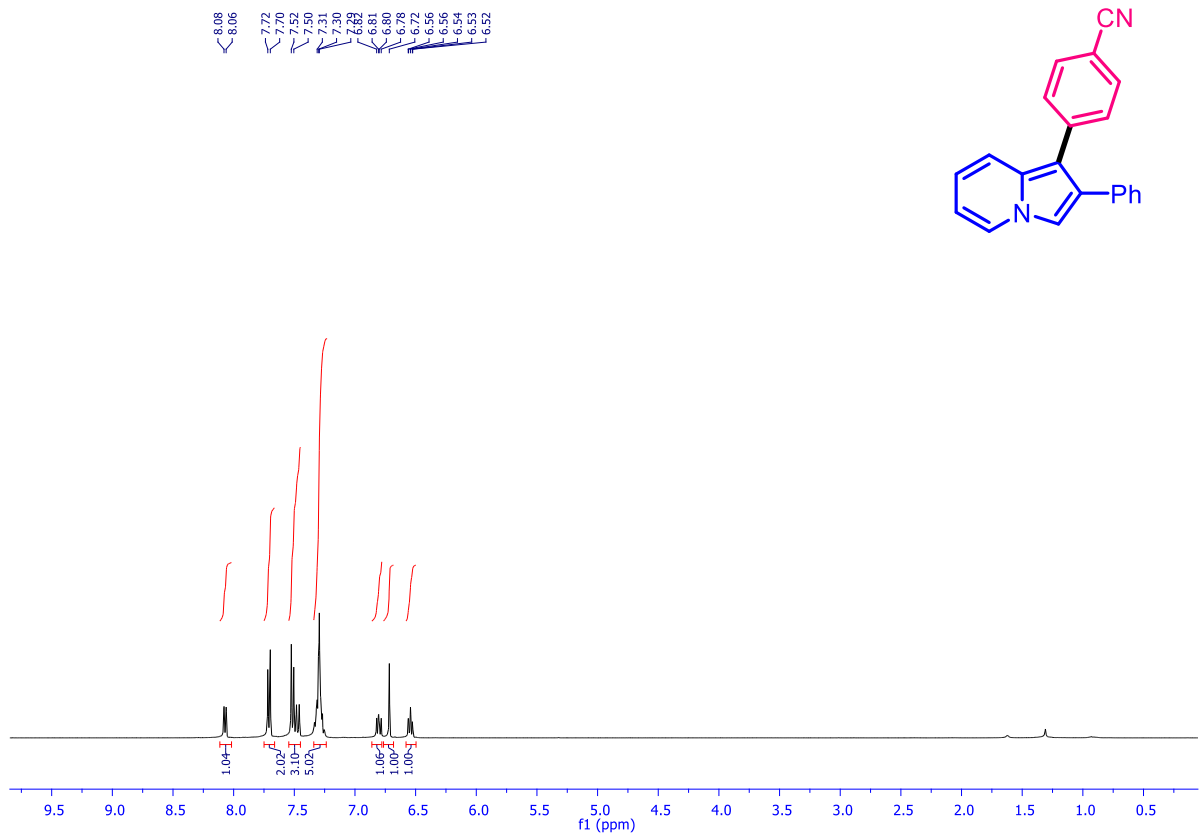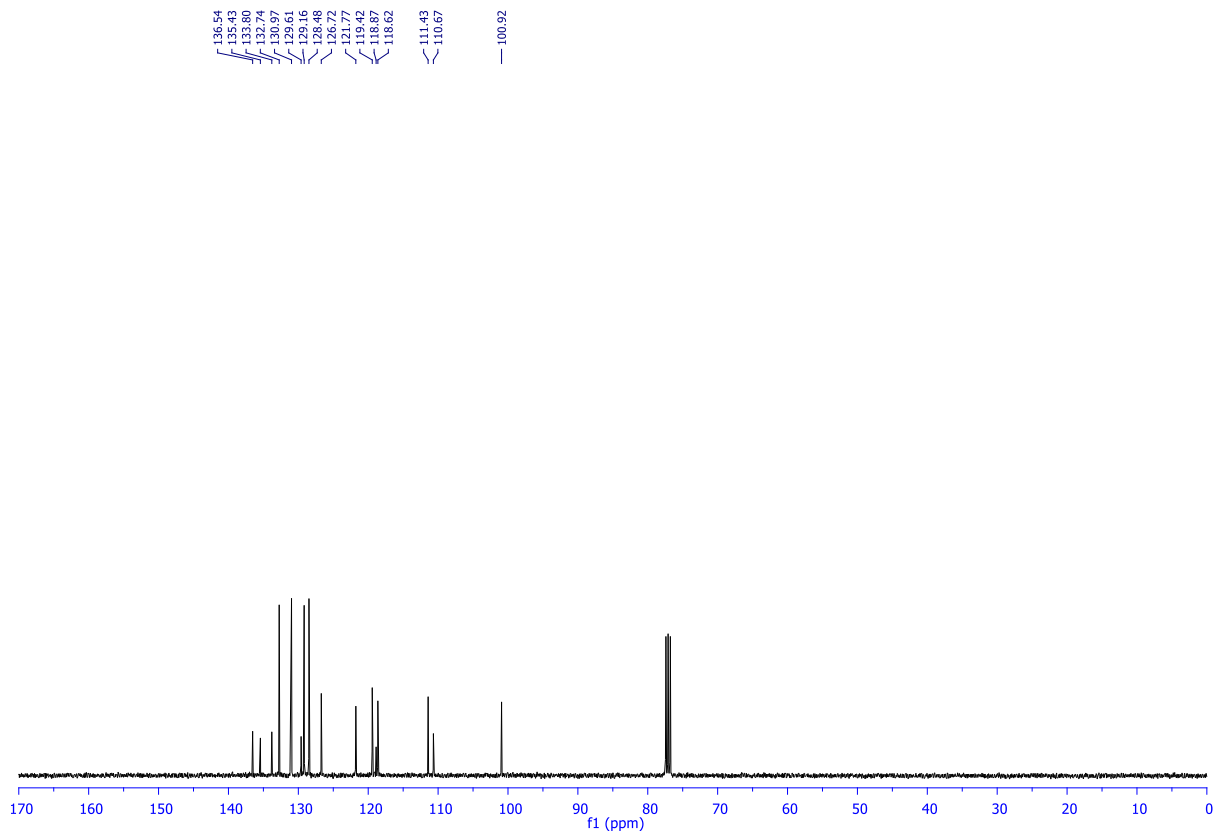

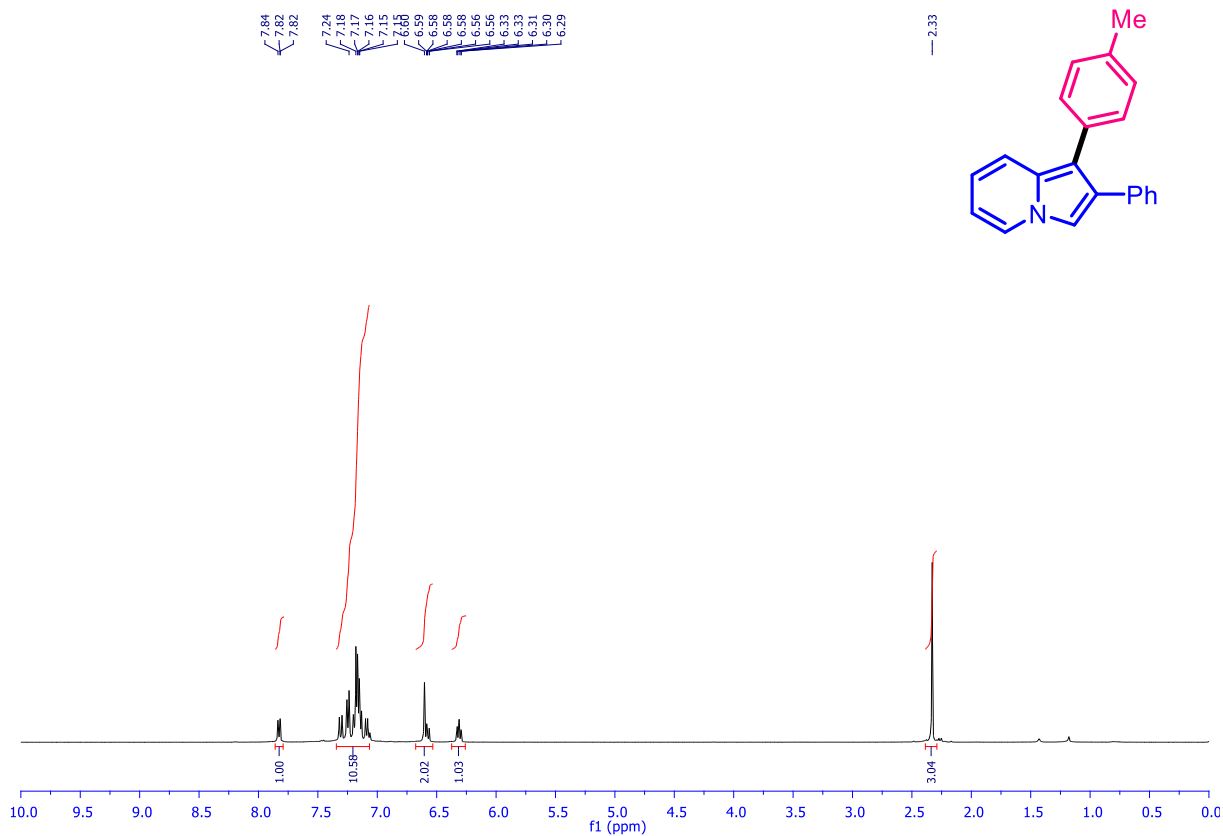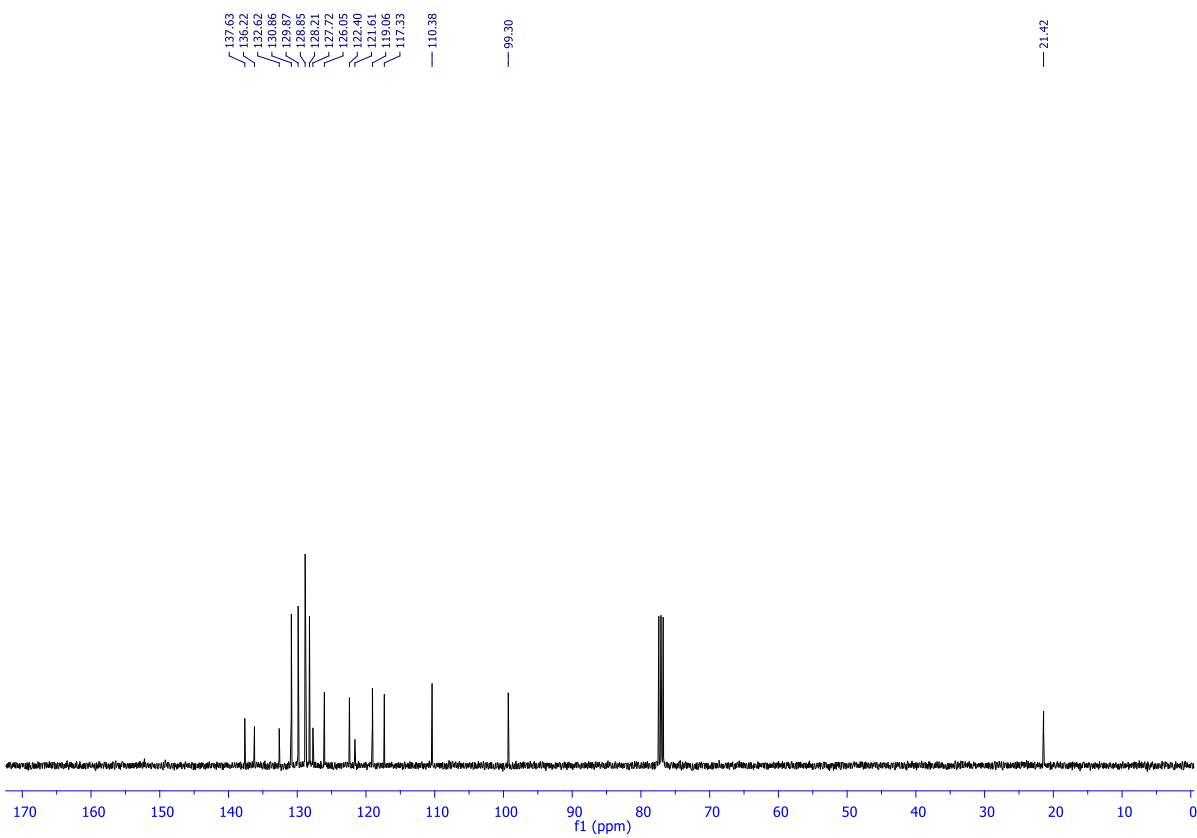

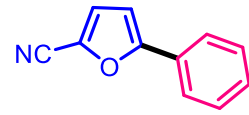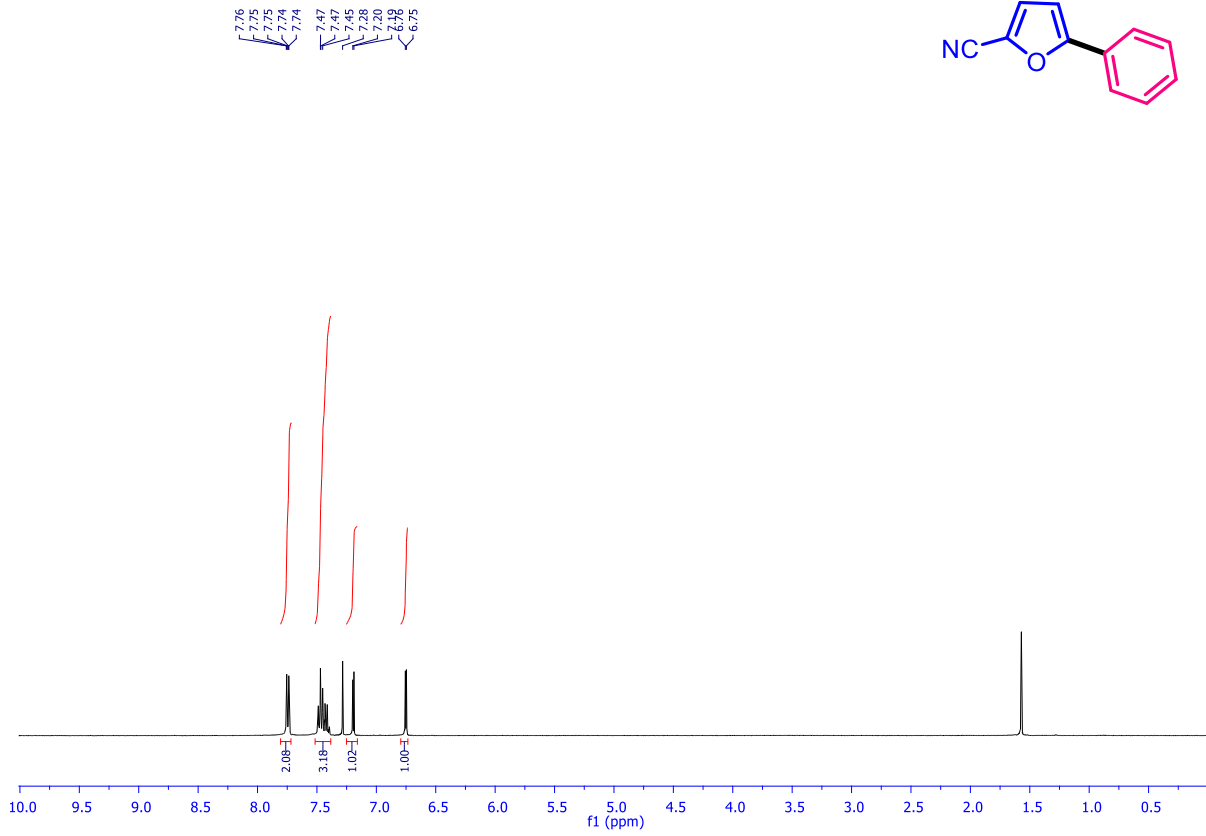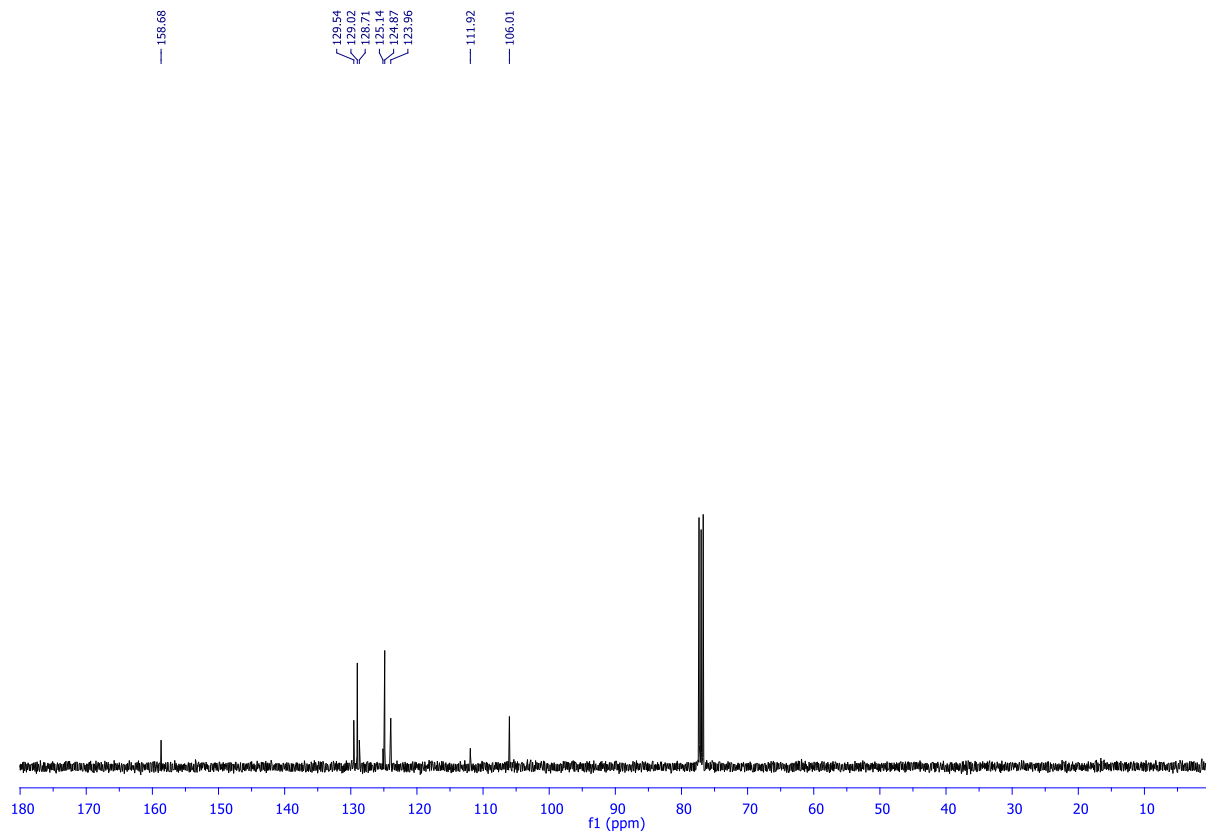

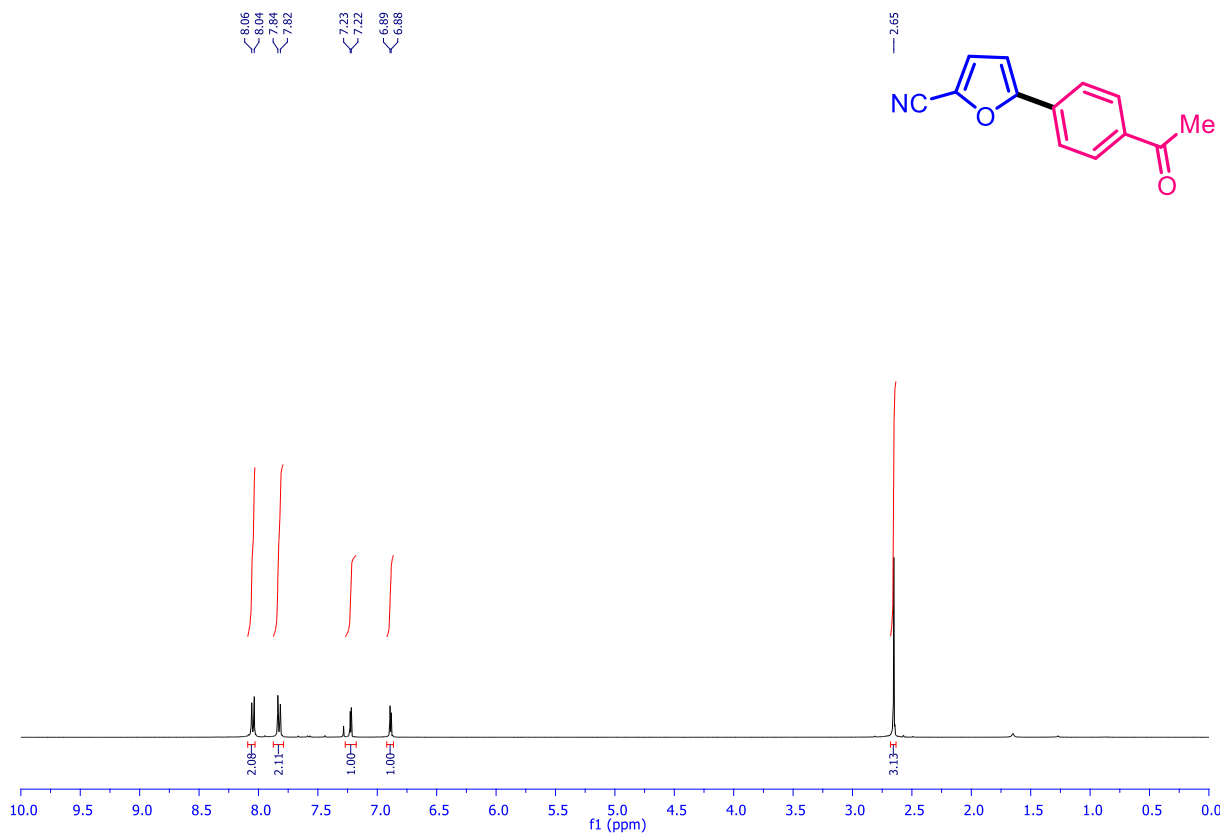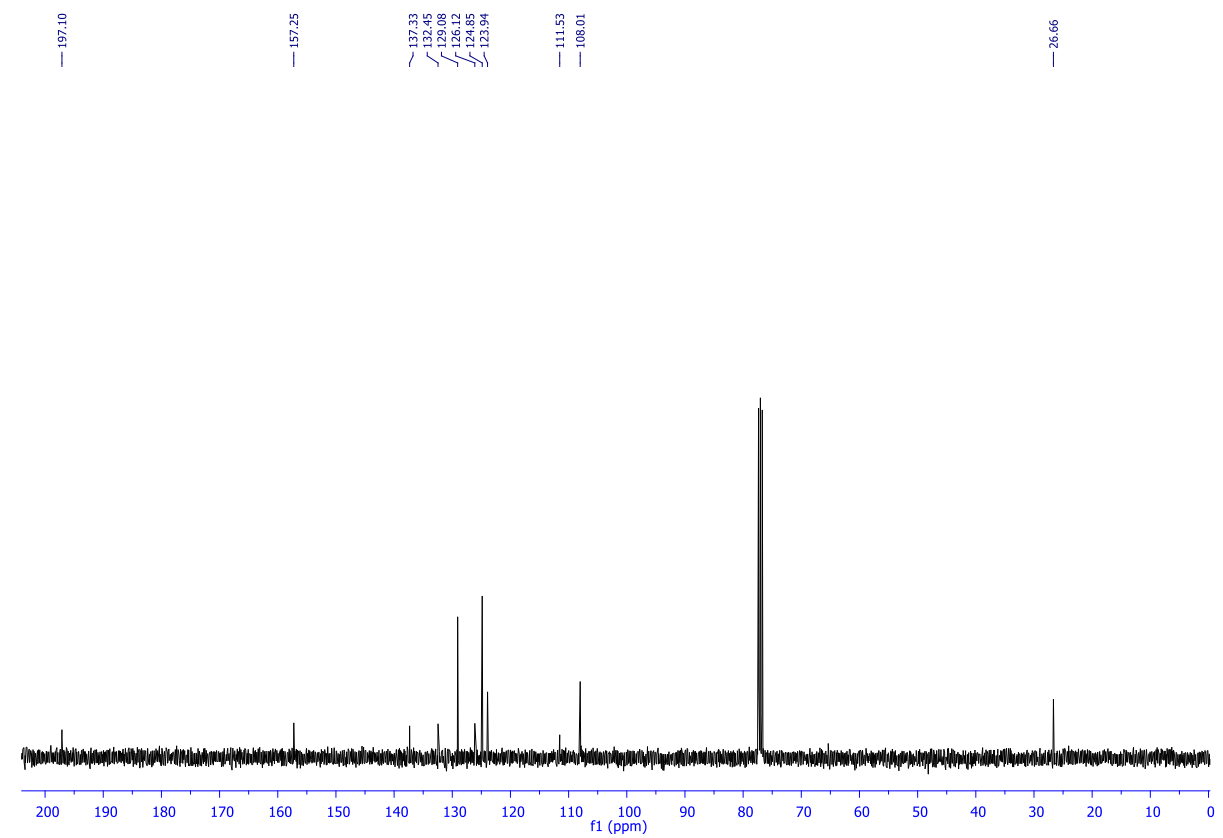

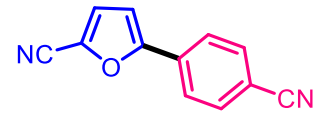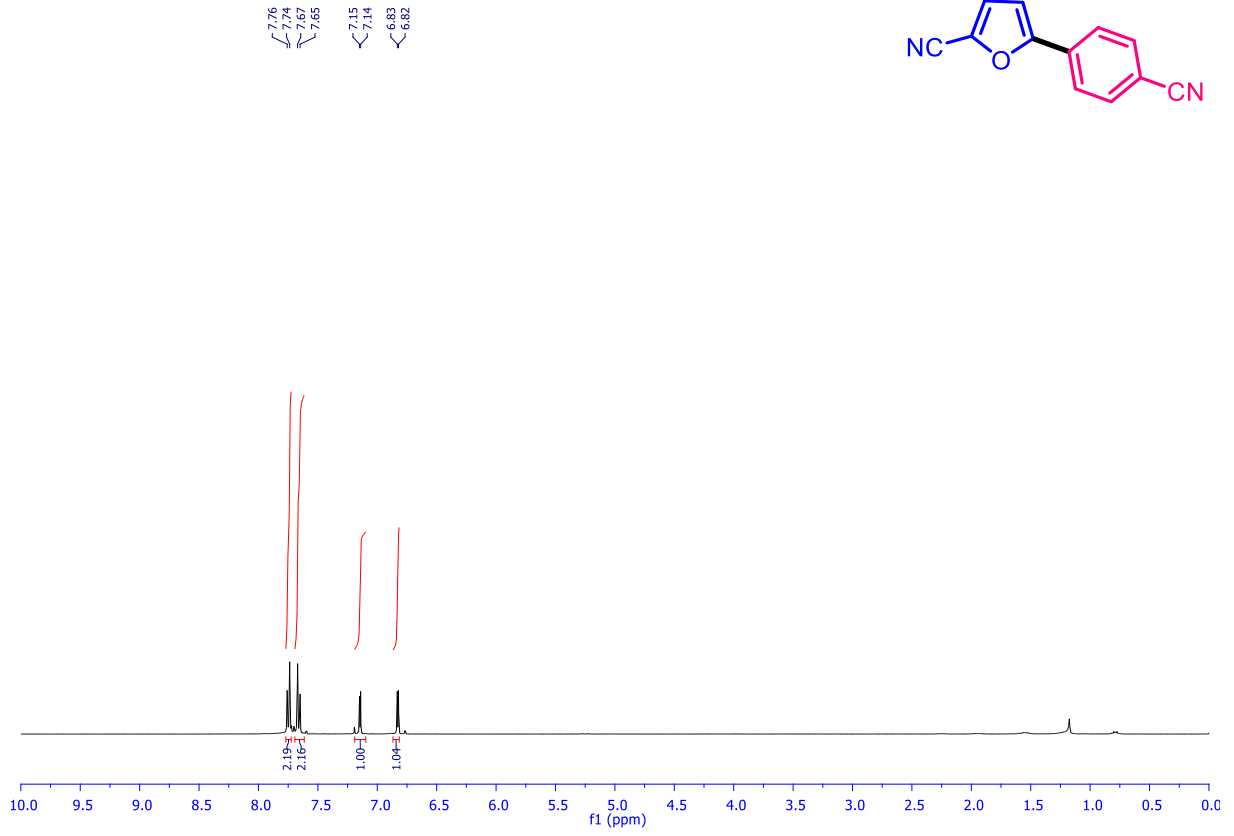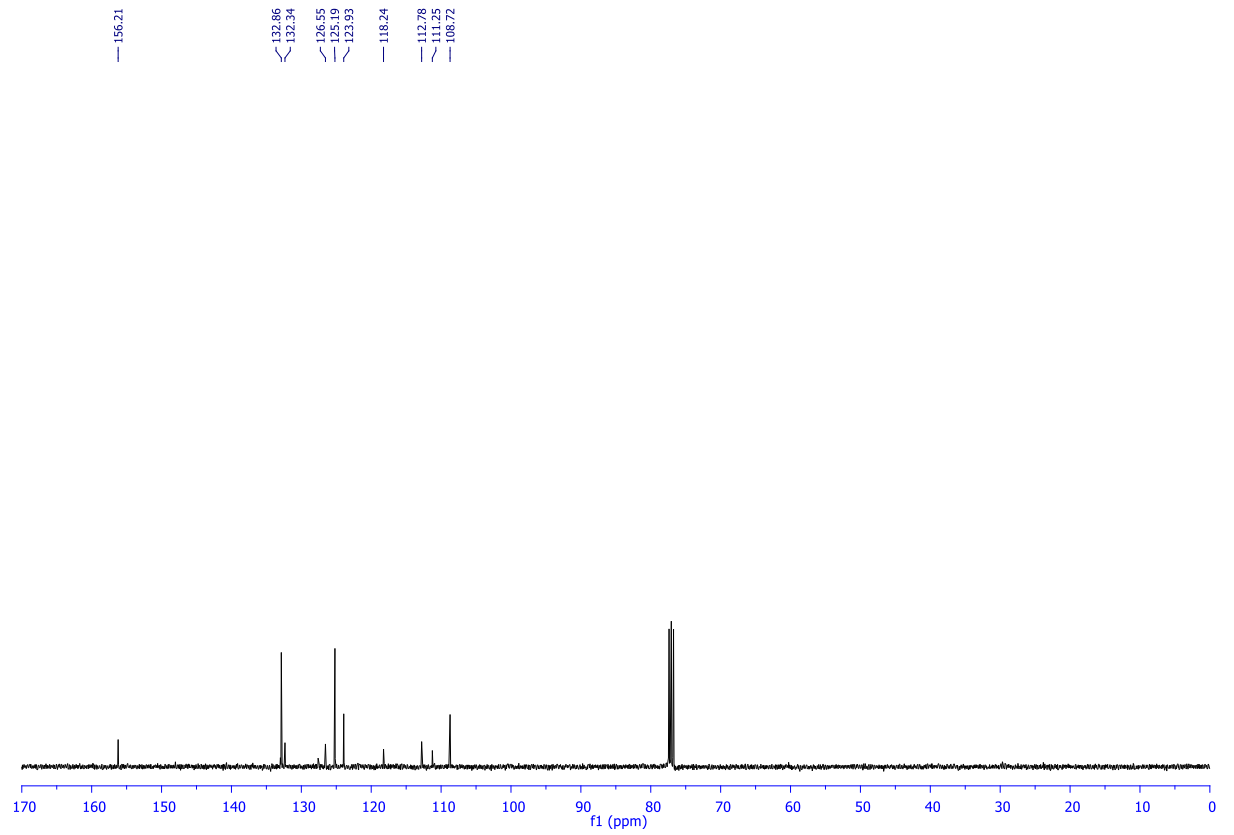

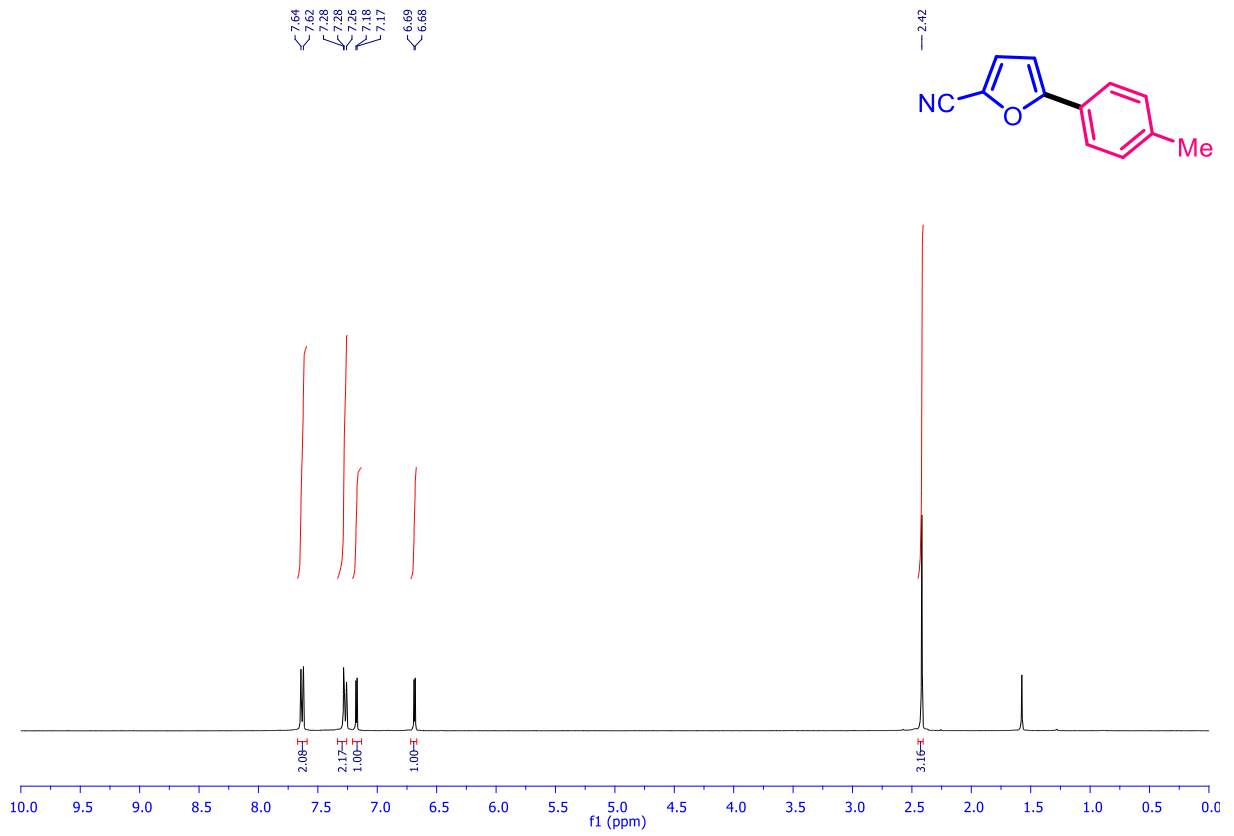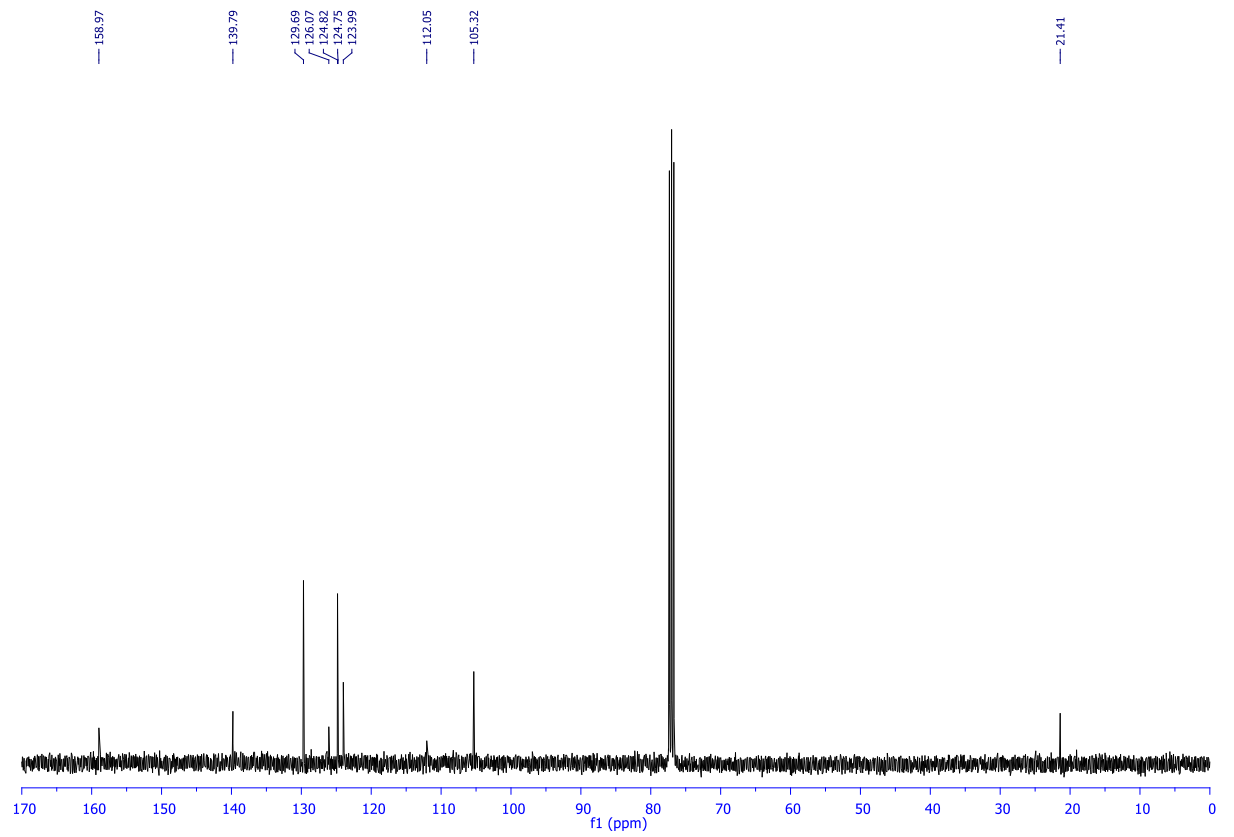



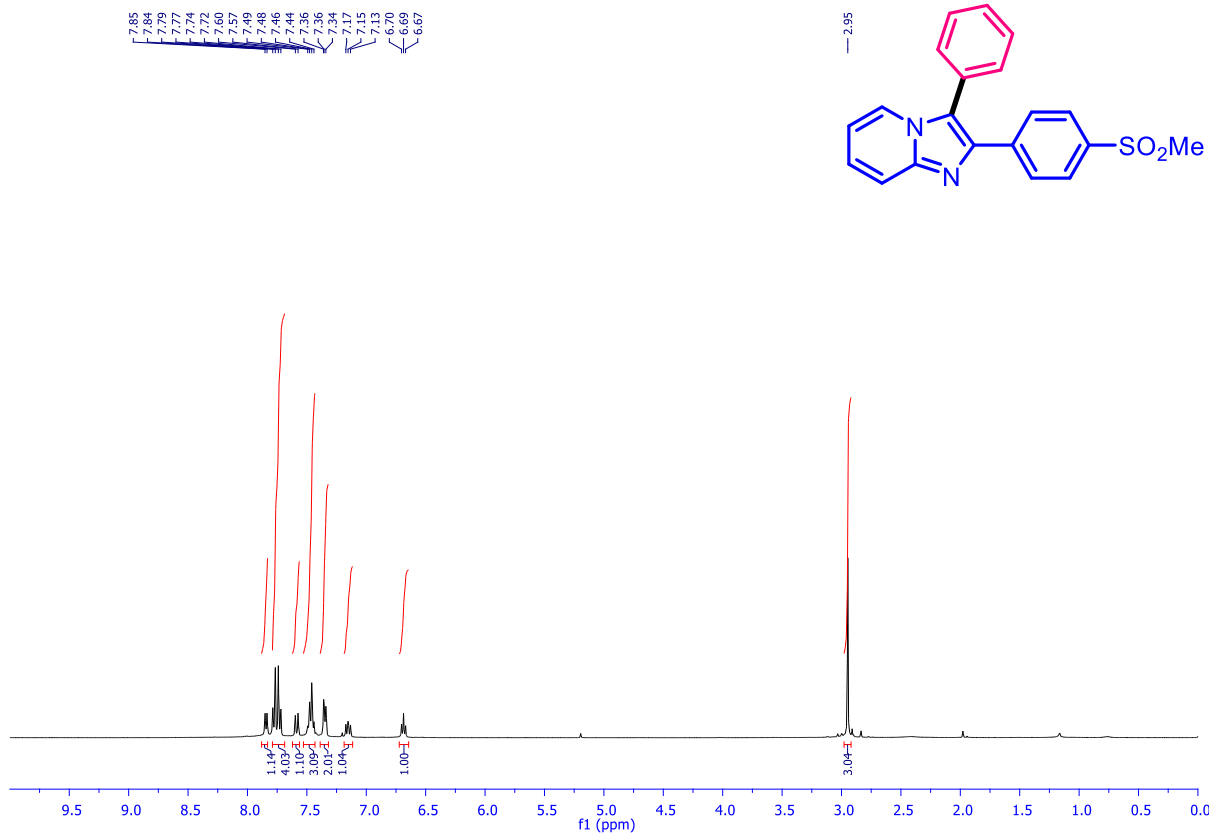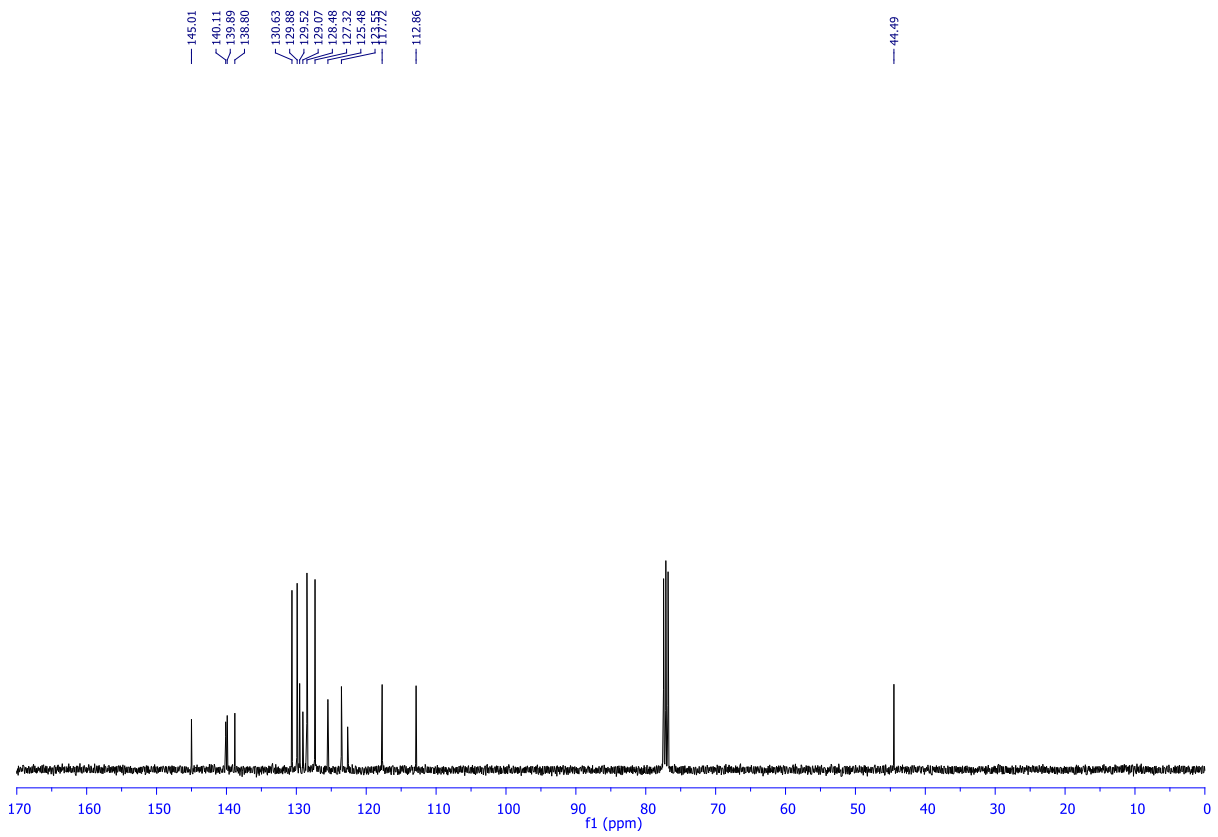

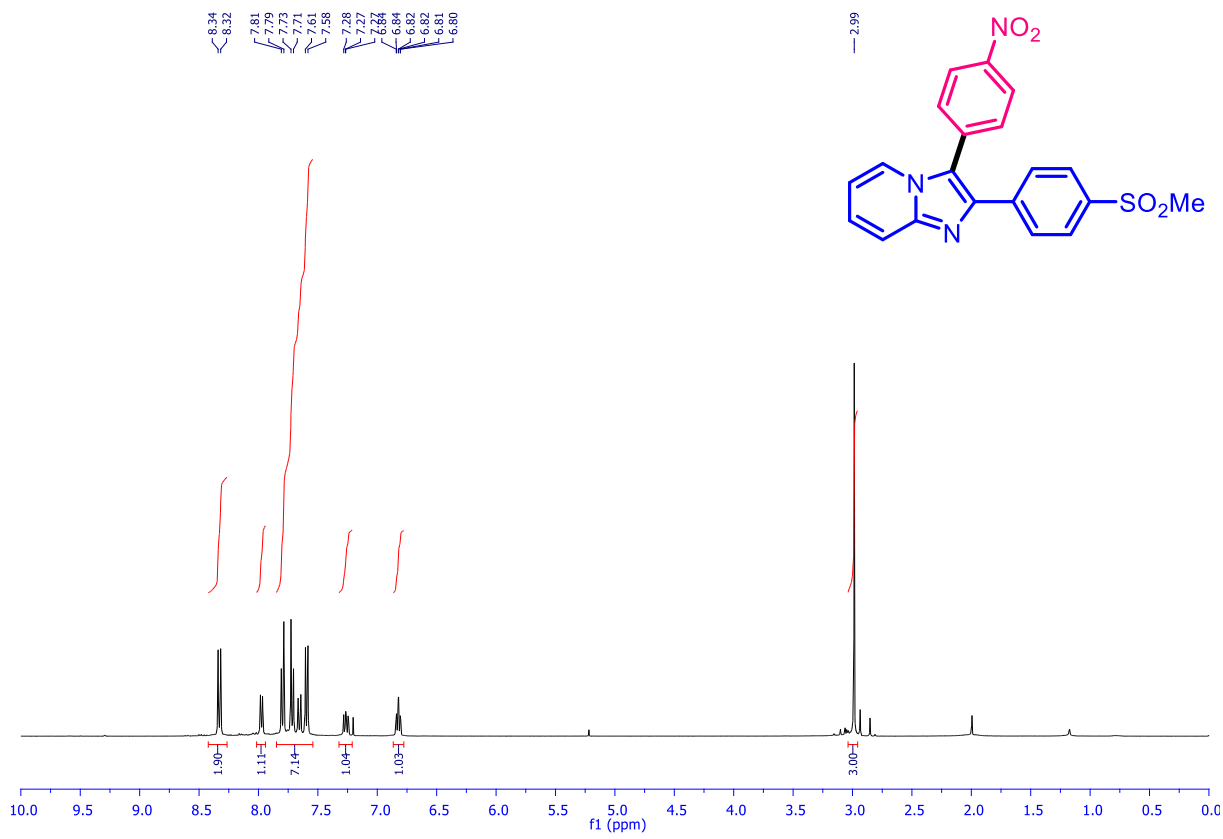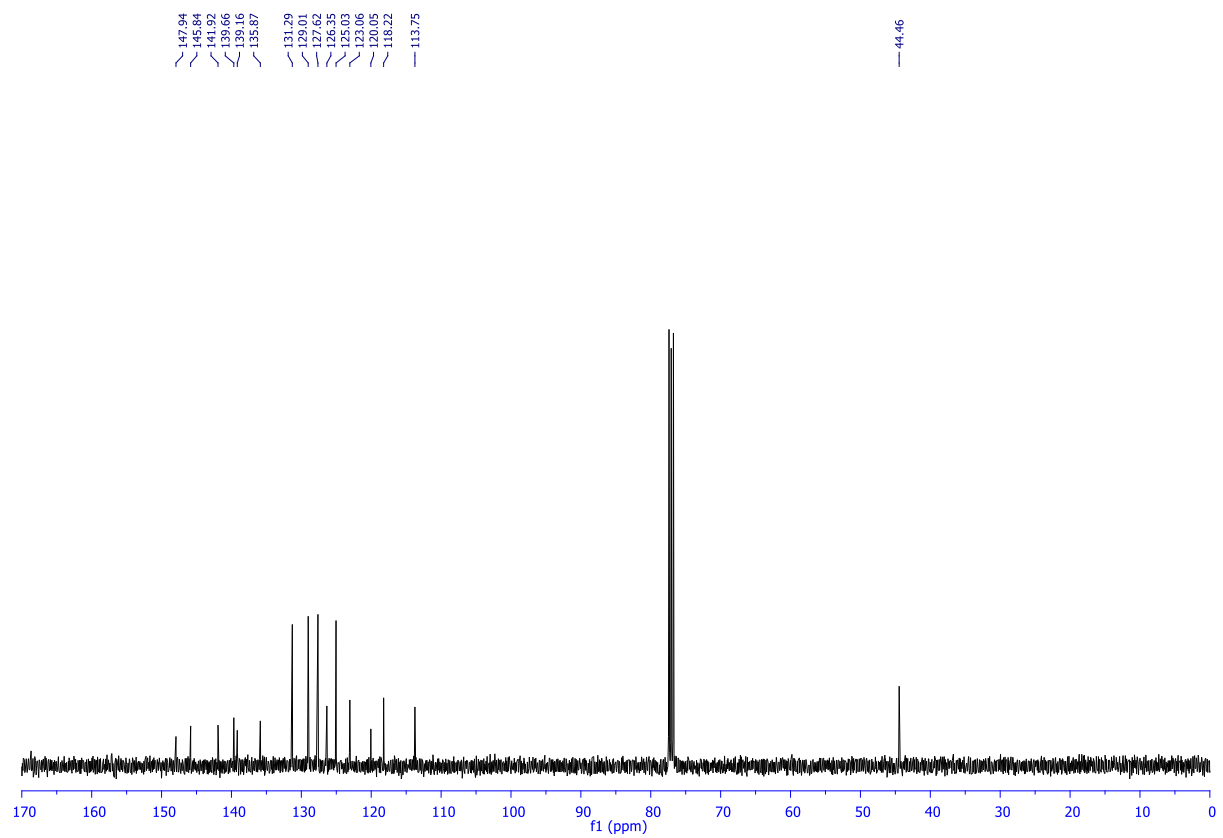

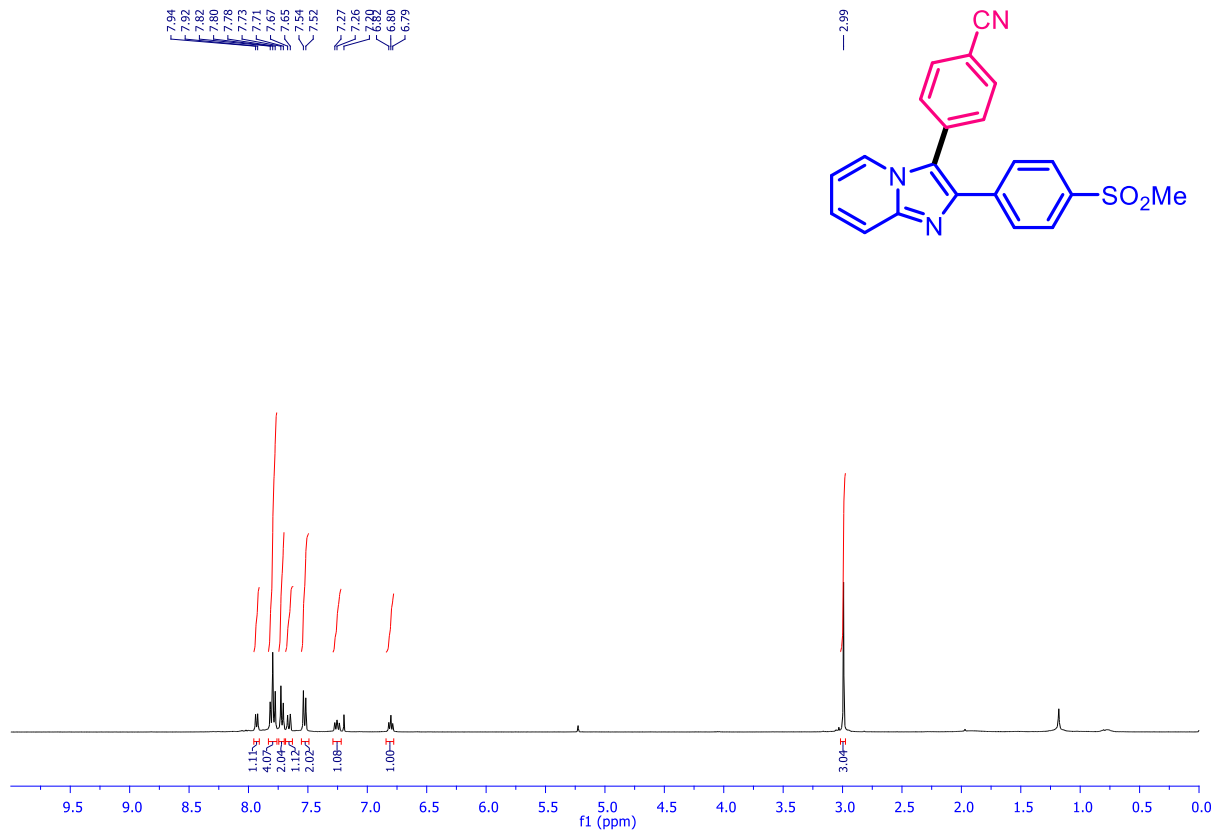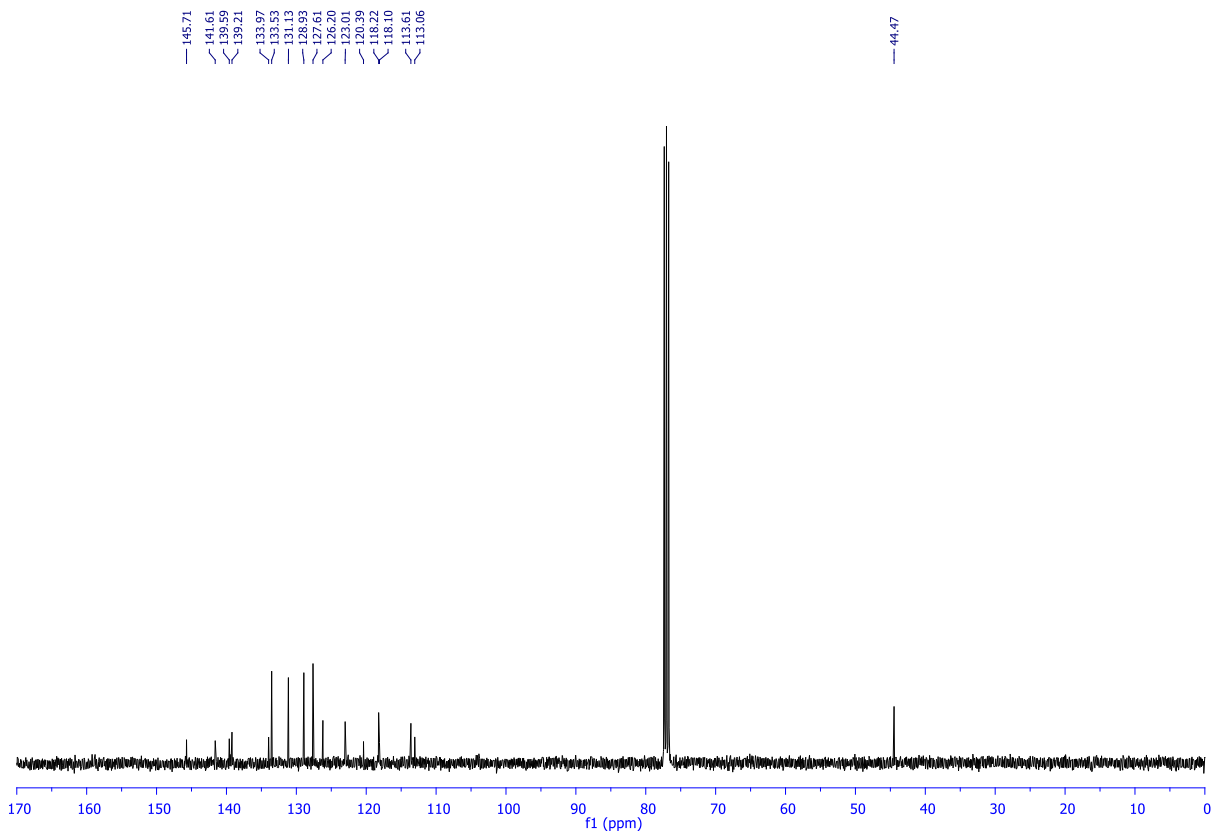

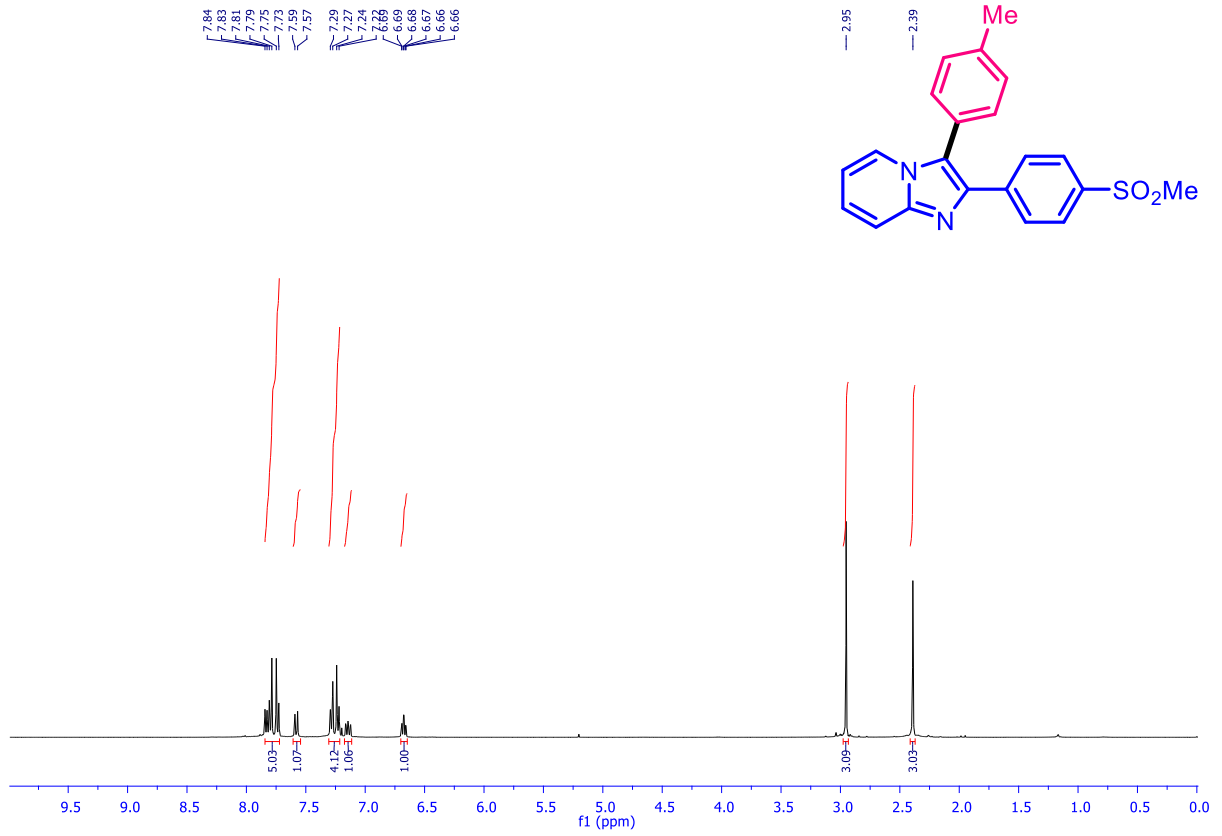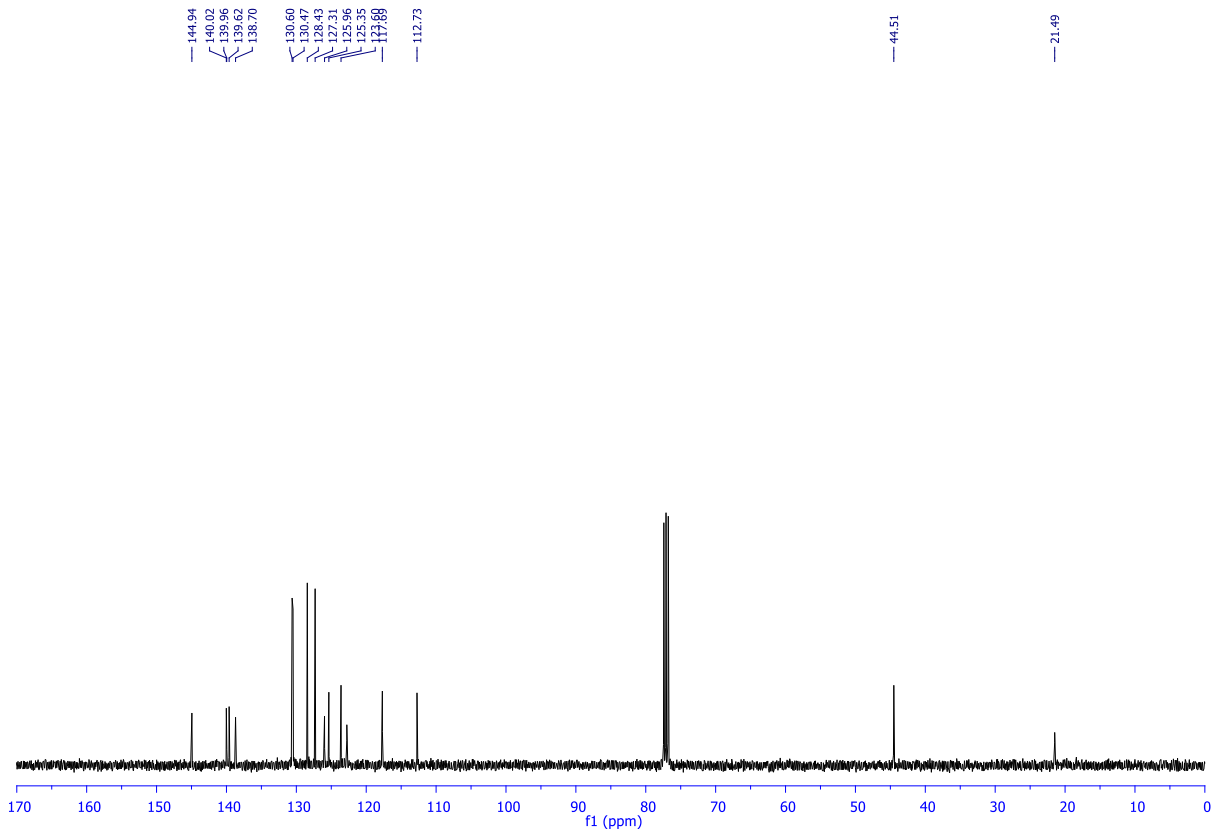

Supplement: d1dt02985a1.pdf [file d1dt02985a1.pdf]
